# Supplementary material for: Inhibition of 12/15-Lipoxygenase Protects Against β-Cell Oxidative Stress and Glycemic Deterioration in Mouse Models of Type 1 Diabetes
Source: Oxford University Press journal article supplement (doi:10.2337/db17-0215), 2017-08-25
Supplement: db170215supplementarydata2.xlsx [file db170215supplementarydata2.xlsx]

## Sheet: human_proteome_candock_run
PDB_CHAIN OR UNIPROT-ID	STRUCTURE	GENE SYMBOL	UNIPROT-ID	ML127 SCORE	ML351 SCORE
3snh_A	experimental	DNM1 DNM	Q05193	-65.6945	-32.4895
3hkv_A	experimental	PARP10	Q53GL7	-59.4984	-40.1661
3lh2_T	experimental	NA	3LH2	-54.311	-40.5102
1egd_A	experimental	ACADM	P11310	-52.7174	-40.5392
3pki_A	experimental	SIRT6 SIR2L6	Q8N6T7	-52.4621	-34.5142
1m6i_A	experimental	AIFM1 AIF PDCD8	O95831	-52.4494	-34.9744
2vr3_B	experimental	NA	2VR3	-52.4415	-39.9112
3ky9_A	experimental	VAV1 VAV	P15498	-52.4363	-39.743
2yl2_A	experimental	ACACA ACAC ACC1 ACCA	Q13085	-51.6117	-36.4665
1z08_A	experimental	RAB21 KIAA0118	Q9UL25	-51.5788	-40.9575
2qrv_A	experimental	DNMT3A	Q9Y6K1	-51.5405	-48.5207
1y93_A	experimental	MMP12 HME	P39900	-50.2059	-35.7771
3hyg_A	experimental	ADAMTS5 ADAMTS11 ADMP2	Q9UNA0	-50.1568	-41.7729
2ygq_A	experimental	WIF1 UNQ191/PRO217	Q9Y5W5	-50.0451	-32.7159
2ysp_A	experimental	ZNF224 BMZF2 KOX22 ZNF233 ZNF255 ZNF27	Q9NZL3	-50.0234	-37.0884
3f9x_A	experimental	KMT5A PRSET7 SET07 SET8 SETD8	Q9NQR1	-49.9913	-40.0961
1d7q_A	experimental	EIF1AX EIF1A EIF4C	P47813	-49.5438	-41.4094
3dlm_A	experimental	SETDB1 KIAA0067 KMT1E	Q15047	-49.3464	-44.0583
2p0w_A	experimental	HAT1 KAT1	O14929	-49.266	-45.4613
2xw9_A	experimental	CFD DF PFD	P00746	-49.2337	-40.8254
2jc6_A	experimental	CAMK1D CAMKID	Q8IU85	-49.1943	-41.7227
2x4f_A	experimental	MYLK4 SGK085	Q86YV6	-49.0062	-38.0534
3ld6_A	experimental	CYP51A1 CYP51	Q16850	-48.9655	-36.7433
3sr4_A	experimental	DOT1L KIAA1814 KMT4	Q8TEK3	-48.9441	-39.4444
1kfu_L	experimental	CAPN2 CANPL2	P17655	-48.9155	-34.5523
3g9v_A	experimental	IL22RA2 UNQ5793/PRO19598/PRO19822	Q969J5	-48.8912	-33.8826
2q3e_A	experimental	UGDH	O60701	-48.8646	-36.4726
2yuy_A	experimental	ARHGAP21 ARHGAP10 KIAA1424	Q5T5U3	-48.7169	-34.4804
2vxo_A	experimental	GMPS	P49915	-48.7162	-33.3968
2pla_A	experimental	GPD1L KIAA0089	Q8N335	-48.5925	-40.0825
2djr_A	experimental	ZBED2	Q9BTP6	-48.3665	-34.339
2jsd_A	experimental	MMP20	O60882	-48.292	-33.0328
2xah_A	experimental	KDM1A AOF2 KDM1 KIAA0601 LSD1	O60341	-48.1962	-38.2659
3o55_A	experimental	ALR	Q9NY86	-48.1825	-31.9417
2c4k_A	experimental	PRPSAP1	Q14558	-48.1567	-46.8077
3soa_A	experimental	CAMK2A CAMKA KIAA0968	Q9UQM7	-48.1263	-26.5654
3hei_B	experimental	EFNA1 EPLG1 LERK1 TNFAIP4	P20827	-48.0865	-32.1951
3tcl_H	experimental	NA	3TCL	-48.0505	-36.0557
3k5k_A	experimental	EHMT2 BAT8 C6orf30 G9A KMT1C NG36	Q96KQ7	-47.9187	-36.7754
1g91_A	experimental	CCL23 MIP3 MPIF1 SCYA23	P55773	-47.8492	-31.9241
2h3l_A	experimental	ERBIN ERBB2IP KIAA1225 LAP2	Q96RT1	-47.8447	-33.4406
3rtr_A	experimental	CUL1	Q13616	-47.7872	-46.9991
1wma_A	experimental	CBR1 CBR CRN SDR21C1	P16152	-47.6157	-33.5569
2l1c_A	experimental	NA	D3DV78	-47.5833	-31.1406
1lyb_A	experimental	CTSD CPSD	P07339	-47.5513	-33.9517
2iwo_A	experimental	MPDZ MUPP1	O75970	-47.3779	-32.6612
2d7q_A	experimental	FLNC ABPL FLN2	Q14315	-47.3294	-39.0685
2kuq_A	experimental	FRS3	O43559	-47.2868	-36.4482
1t94_A	experimental	POLK DINB1	Q9UBT6	-47.1658	-35.7161
2dsr_G	experimental	IGFBP4 IBP4	P22692	-47.1361	-32.0765
2j3s_A	experimental	FLNA FLN FLN1	P21333	-47.0888	-30.0651
3dpl_C	experimental	CUL5 VACM1	Q93034	-47.0503	-36.685
1isi_A	experimental	BST1	Q10588	-47.0335	-39.614
2ddf_A	experimental	ADAM17 CSVP TACE	P78536	-47.0152	-29.0203
3ahq_A	experimental	ERO1A ERO1L UNQ434/PRO865	Q96HE7	-46.9974	-28.129
1a27_A	experimental	HSD17B1 E17KSR EDH17B1 EDH17B2 EDHB17 SDR28C1	P14061	-46.9536	-34.4354
3ikm_A	experimental	POLG MDP1 POLG1 POLGA	P54098	-46.881	-36.1912
3teg_A	experimental	FARS2 FARS1 HSPC320	O95363	-46.7706	-32.1867
2lgr_A	experimental	OARD1 C6orf130	Q9Y530	-46.6831	-30.0426
3k26_A	experimental	EED	O75530	-46.6243	-29.1835
3swr_A	experimental	DNMT1 AIM CXXC9 DNMT	P26358	-46.6124	-30.8781
3h5c_B	experimental	PROZ	P22891	-46.539	-40.7979
3pta_A	experimental	DNMT1 AIM CXXC9 DNMT	P26358	-46.3994	-37.5621
2axn_A	experimental	PFKFB3	Q16875	-46.3951	-37.6989
2z0d_A	experimental	ATG4B APG4B AUTL1 KIAA0943	Q9Y4P1	-46.2762	-31.6371
2fho_A	experimental	SF3B1 SAP155	O75533	-46.2735	-38.8931
1fw1_A	experimental	GSTZ1 MAAI	O43708	-46.2386	-29.7562
3qfa_A	experimental	TXNRD1 GRIM12 KDRF	Q16881	-46.1713	-31.2206
1j96_A	experimental	AKR1C2 DDH2	P52895	-46.146	-37.3825
3i08_B	experimental	NOTCH1 TAN1	P46531	-46.1308	-43.1517
3caf_A	experimental	FGFR2 BEK KGFR KSAM	P21802	-46.124	-35.4979
3beg_B	experimental	SRSF1 ASF SF2 SF2P33 SFRS1 OK/SW-cl.3	Q07955	-46.1218	-35.6709
2w86_A	experimental	FBN1 FBN	P35555	-46.1096	-43.0039
2ccq_A	experimental	NGLY1 PNG1	Q96IV0	-46.0279	-29.3984
1yov_A	experimental	NAE1 APPBP1 HPP1	Q13564	-46.011	-34.736
2pd6_A	experimental	HSD17B8 FABGL HKE6 RING2 SDR30C1	Q92506	-46.0013	-27.2094
1zbq_A	experimental	HSD17B4 EDH17B4 SDR8C1	P51659	-45.989	-32.2661
2b3y_A	experimental	ACO1 IREB1	P21399	-45.9491	-34.7555
1t91_A	experimental	RAB7A RAB7	P51149	-45.9057	-35.8714
2i32_A	experimental	ASF1A CGI-98 HSPC146	Q9Y294	-45.899	-36.0034
3qwp_A	experimental	SMYD3 ZMYND1 ZNFN3A1	Q9H7B4	-45.876	-37.8105
2vod_B	experimental	SSB	P05455	-45.8712	-35.2647
3bu8_B	experimental	TERF2 TRBF2 TRF2	Q15554	-45.657	-36.2425
1u3w_A	experimental	ADH1C ADH3	P00326	-45.6519	-32.6917
1tpm_A	experimental	PLAT	P00750	-45.6175	-28.8488
3nks_A	experimental	PPOX	P50336	-45.5211	-34.7208
2dzq_A	experimental	GTF2IRD1 CREAM1 GTF3 MUSTRD1 RBAP2 WBSCR11 WBSCR12	Q9UHL9	-45.4843	-20.5514
2ode_A	experimental	GNAI3	P08754	-45.458	-32.7803
3cmy_A	experimental	PAX3 HUP2	P23760	-45.4141	-34.2453
1yov_B	experimental	UBA3 UBE1C	Q8TBC4	-45.4041	-30.1738
3qft_A	experimental	POR CYPOR	P16435	-45.3564	-43.976
2r53_A	experimental	BMP6 VGR	P22004	-45.2867	-29.2461
1wwx_A	experimental	ELF5 ESE2	Q9UKW6	-45.2454	-37.4494
3llp_A	experimental	FSCN1 FAN1 HSN SNL	Q16658	-45.2138	-35.0594
2yrq_A	experimental	HMGB1 HMG1	P09429	-45.204	-46.2349
3c3r_A	experimental	PDCD6IP AIP1 ALIX KIAA1375	Q8WUM4	-45.1839	-32.7635
2qq5_A	experimental	DHRS1 SDR19C1	Q96LJ7	-45.155	-38.9219
1zq9_A	experimental	DIMT1 DIMT1L HUSSY-05	Q9UNQ2	-45.1077	-36.5623
2uzc_A	experimental	PDLIM5 ENH L9	Q96HC4	-45.0882	-17.5453
1y8q_B	experimental	UBA2 SAE2 UBLE1B HRIHFB2115	Q9UBT2	-45.0872	-33.1526
1xu9_A	experimental	HSD11B1 HSD11 HSD11L SDR26C1	P28845	-44.9607	-38.776
3f02_A	experimental	SERPINI1 PI12	Q99574	-44.9266	-37.494
2rjp_A	experimental	ADAMTS4 KIAA0688 UNQ769/PRO1563	O75173	-44.9156	-37.977
2arr_A	experimental	SERPINB2 PAI2 PLANH2	P05120	-44.9	-49.5072
1z8g_A	experimental	HPN TMPRSS1	P05981	-44.8985	-28.4308
1btk_A	experimental	BTK AGMX1 ATK BPK	Q06187	-44.867	-28.1922
2rku_A	experimental	PLK1 PLK	P53350	-44.8651	-37.0102
1wz0_A	experimental	SUMO2 SMT3B SMT3H2	P61956	-44.8457	-35.3242
2xrw_A	experimental	MAPK8 hCG_23734	A1L4K2	-44.8156	-34.4697
2h3n_A	experimental	VPREB1 VPREB	P12018	-44.7905	-41.8906
3l43_A	experimental	DNM3 KIAA0820	Q9UQ16	-44.7669	-33.996
1k62_A	experimental	ASL	P04424	-44.7593	-38.6783
2eam_A	experimental	ANKS1B	Q7Z6G8	-44.7471	-31.0412
2daq_A	experimental	WHSC1L1 NSD3 DC28	Q9BZ95	-44.7259	-36.7424
2h32_A	experimental	VPREB1 VPREB	P12018	-44.7196	-38.5889
2z7x_A	experimental	TLR2 TIL4	O60603	-44.6711	-27.6754
2acm_B	experimental	MUC1 PUM	P15941	-44.655	-36.3913
2ffq_A	experimental	RAB6B	Q9NRW1	-44.654	-38.3435
3qxy_A	experimental	SETD6	Q8TBK2	-44.6281	-38.4531
3uyj_A	experimental	KDM8 JMJD5	Q8N371	-44.61	-19.8332
2eov_A	experimental	ZNF484	Q5JVG2	-44.5424	-34.7922
2i9p_A	experimental	HIBADH	P31937	-44.5183	-24.7429
1x6v_B	experimental	PAPSS1 ATPSK1 PAPSS	O43252	-44.4881	-38.0869
2hrb_A	experimental	CBR3	O75828	-44.4656	-37.2547
2oo0_A	experimental	ODC1	P11926	-44.4579	-38.496
2dah_A	experimental	UBQLN3	Q9H347	-44.4386	-29.8752
1fyh_A	experimental	IFNG	P01579	-44.4155	-42.3598
1qub_A	experimental	APOH B2G1	P02749	-44.4101	-30.7134
3dtc_A	experimental	MAP3K9 MLK1 PRKE1	P80192	-44.3736	-34.1825
1h6h_A	experimental	NCF4 SH3PXD4	Q15080	-44.3603	-35.4371
3idg_A	experimental	NA	3IDG	-44.3498	-31.1032
1siq_A	experimental	GCDH	Q92947	-44.3472	-33.0932
1ujv_A	experimental	MAGI2 ACVRINP1 AIP1 KIAA0705	Q86UL8	-44.2949	-34.8212
2i99_A	experimental	CRYM THBP	Q14894	-44.2803	-41.8431
1t3n_A	experimental	POLI RAD30B	Q9UNA4	-44.2739	-33.3179
2pbc_A	experimental	FKBP2 FKBP13	P26885	-44.263	-33.3979
2dko_B	experimental	CASP3 CPP32	P42574	-44.246	-32.0407
2odp_A	experimental	C2	P06681	-44.2447	-34.4315
3hr4_A	experimental	NOS2 NOS2A	P35228	-44.2269	-48.864
3iei_A	experimental	LCMT1 LCMT CGI-68	Q9UIC8	-44.2243	-39.5908
3dal_A	experimental	PRDM1 BLIMP1	O75626	-44.2125	-35.0547
1zmz_A	experimental	CETN2 CALT CEN2	P41208	-44.2034	-34.5715
3u9q_A	experimental	PPARG NR1C3	P37231	-44.1925	-31.5337
2rrf_A	experimental	ZFYVE21	Q9BQ24	-44.1769	-28.2823
2xzp_A	experimental	UPF1 KIAA0221 RENT1	Q92900	-44.1566	-37.492
1r55_A	experimental	ADAM33 C20orf153 UNQ873/PRO1891	Q9BZ11	-44.1236	-30.5241
2c5l_B	experimental	HRAS HRAS1	P01112	-44.1185	-37.8838
2qjf_A	experimental	PAPSS1 ATPSK1 PAPSS	O43252	-44.0885	-31.836
2dsp_B	experimental	IGFBP4 IBP4	P22692	-44.0876	-37.8666
1rm8_A	experimental	MMP16 MMPX2	P51512	-44.0636	-37.2096
1k6m_A	experimental	PFKFB1 F6PK PFRX	P16118	-44.0617	-41.0322
1lpb_B	experimental	PNLIP	P16233	-44.0517	-39.6435
1dyt_A	experimental	RNASE3 ECP RNS3	P12724	-44.0271	-25.1369
1p9o_A	experimental	PPCS COAB	Q9HAB8	-44.0091	-30.0216
1iau_A	experimental	GZMB CGL1 CSPB CTLA1 GRB	P10144	-43.9762	-36.2045
3f6u_H	experimental	PROC	P04070	-43.9352	-29.459
2eom_A	experimental	ZKSCAN5 KIAA1015 ZFP95	Q9Y2L8	-43.9289	-32.6028
2ena_A	experimental	ZNF224 BMZF2 KOX22 ZNF233 ZNF255 ZNF27	Q9NZL3	-43.9201	-30.7649
3orh_A	experimental	GAMT	Q14353	-43.8806	-26.773
1x47_A	experimental	DGCR8 C22orf12 DGCRK6 LP4941	Q8WYQ5	-43.8769	-39.5213
2k9g_A	experimental	SH3KBP1 CIN85	Q96B97	-43.8602	-32.1444
1mlw_A	experimental	TPH1 TPH TPRH TRPH	P17752	-43.8596	-45.5826
3b8k_A	experimental	DLAT DLTA	P10515	-43.843	-29.4677
1t2a_A	experimental	GMDS	O60547	-43.8201	-32.0956
2ctm_A	experimental	HDLBP HBP VGL	Q00341	-43.7493	-36.0374
2xij_A	experimental	MUT	P22033	-43.7031	-28.322
1d1t_A	experimental	ADH7	P40394	-43.695	-36.8398
1bg2_A	experimental	KIF5B KNS KNS1	P33176	-43.6905	-37.6596
1x0h_A	experimental	IQGAP1 KIAA0051	P46940	-43.6867	-33.086
2w5a_A	experimental	NEK2 NEK2A NLK1	P51955	-43.6461	-33.8788
2gjx_A	experimental	HEXA	P06865	-43.6281	-35.9121
1uap_A	experimental	PCOLCE PCPE1	Q15113	-43.6272	-25.6721
3ray_A	experimental	PRDM11 PFM8	Q9NQV5	-43.6239	-32.372
2fne_A	experimental	MPDZ MUPP1	O75970	-43.6191	-34.6063
3i90_A	experimental	CBX6	O95503	-43.6158	-40.4432
1kmv_A	experimental	DHFR	P00374	-43.5682	-36.2128
1pyo_A	experimental	CASP2 ICH1 NEDD2	P42575	-43.5653	-30.8371
1r2q_A	experimental	RAB5A RAB5	P20339	-43.541	-32.6303
3iho_A	experimental	MBD4 MED1	O95243	-43.5337	-31.0811
2wbi_A	experimental	ACAD11	Q709F0	-43.5281	-37.3927
3hfw_A	experimental	ADPRH ARH1	P54922	-43.505	-21.5595
2cpy_A	experimental	RBM12 KIAA0765 HRIHFB2091	Q9NTZ6	-43.4999	-39.2688
2rax_A	experimental	BIRC5 API4 IAP4	O15392	-43.497	-27.5253
3b6y_A	experimental	IFI16 IFNGIP1	Q16666	-43.4775	-33.6538
1xr0_B	experimental	FRS2	Q8WU20	-43.4771	-44.758
3dzy_A	experimental	RXRA NR2B1	P19793	-43.4722	-24.8772
2eqf_A	experimental	TNFAIP3 OTUD7C	P21580	-43.4681	-34.8387
1qzu_A	experimental	PPCDC COAC MDS018 UNQ9365/PRO34154	Q96CD2	-43.465	-35.1707
2bzy_A	experimental	CRKL	P46109	-43.4578	-29.393
1nst_A	experimental	NDST1 HSST HSST1	P52848	-43.4459	-34.7367
2r3a_A	experimental	SUV39H2 KMT1B	Q9H5I1	-43.3851	-33.7313
1qtn_A	experimental	CASP8 MCH5	Q14790	-43.3771	-31.3182
3lyi_A	experimental	BRD1 BRL BRPF2	O95696	-43.3539	-34.0039
2pzd_A	experimental	HTRA2 OMI PRSS25	O43464	-43.2992	-41.6681
1a12_A	experimental	RCC1 CHC1	P18754	-43.2915	-31.8585
1obz_B	experimental	SDCBP MDA9 SYCL	O00560	-43.2261	-32.0844
1wvn_A	experimental	PCBP1	Q15365	-43.1815	-24.2778
3qlp_H	experimental	F2	P00734	-43.1734	-29.5731
3tk9_A	experimental	GZMH CGL2 CTSGL2	P20718	-43.1549	-29.681
2zgc_A	experimental	GZMM MET1	P51124	-43.1504	-30.6968
3biy_A	experimental	EP300 P300	Q09472	-43.1484	-27.0679
2fho_B	experimental	SF3B6 SAP14 SF3B14 SF3B14A CGI-110 HSPC175 HT006	Q9Y3B4	-43.1292	-30.4743
1jd0_A	experimental	CA12	O43570	-43.103	-30.2551
2e6p_A	experimental	OBSL1 KIAA0657	O75147	-43.0918	-35.6334
2d9o_A	experimental	DNAJC17	Q9NVM6	-43.0762	-33.0415
3cu0_A	experimental	B3GAT3	O94766	-43.0465	-29.2046
2vfx_A	experimental	MAD2L1 MAD2	Q13257	-43.031	-31.519
2xue_A	experimental	KDM6B JMJD3 KIAA0346	O15054	-43.0259	-41.7737
3fpu_B	experimental	CCL3 G0S19-1 MIP1A SCYA3	P10147	-43.0135	-40.7195
2b3o_A	experimental	PTPN6 HCP PTP1C	P29350	-42.9549	-36.1247
2dmz_A	experimental	PATJ INADL	Q8NI35	-42.9481	-39.8335
1r3s_A	experimental	UROD	P06132	-42.9246	-34.8633
1f5n_A	experimental	GBP1	P32455	-42.8947	-31.7934
1bzy_A	experimental	HPRT1 HPRT	P00492	-42.8862	-41.0005
4a60_A	experimental	FABP9	Q0Z7S8	-42.8839	-33.436
2cqo_A	experimental	ZCCHC17 PS1D HSPC243 HSPC251 LDC4	Q9NP64	-42.8745	-31.2397
2gcg_A	experimental	GRHPR GLXR MSTP035	Q9UBQ7	-42.8616	-31.2688
2rjq_A	experimental	ADAMTS5 ADAMTS11 ADMP2	Q9UNA0	-42.8309	-35.8823
3aox_A	experimental	ALK	Q9UM73	-42.8251	NA
2pkt_A	experimental	PDLIM1 CLIM1 CLP36	O00151	-42.819	-29.7169
3abd_A	experimental	MAD2L2 MAD2B REV7	Q9UI95	-42.8133	-37.4583
3kzd_A	experimental	TIAM1	Q13009	-42.7248	-27.443
1jv1_A	experimental	UAP1 SPAG2	Q16222	-42.7242	-29.9884
1lct_A	experimental	LTF GIG12 LF	P02788	-42.6973	-33.4634
2kl7_A	experimental	EFEMP2 FBLN4 UNQ200/PRO226	O95967	-42.6886	-33.3645
2cq0_A	experimental	EIF3G EIF3S4	O75821	-42.6877	-37.5016
3dk9_A	experimental	GSR GLUR GRD1	P00390	-42.6849	-29.3799
2r7g_A	experimental	RB1	P06400	-42.6684	-33.9798
2daz_A	experimental	PATJ INADL	Q8NI35	-42.6567	-32.7083
3ckl_A	experimental	SULT1B1 ST1B2 SULT1B2	O43704	-42.6529	NA
3bj5_A	experimental	P4HB ERBA2L PDI PDIA1 PO4DB	P07237	-42.6486	-29.9303
2q7d_A	experimental	ITPK1	Q13572	-42.6279	-26.4723
2kyu_A	experimental	KMT2A ALL1 CXXC7 HRX HTRX MLL MLL1 TRX1	Q03164	-42.6059	-30.7774
3ber_A	experimental	DDX47	Q9H0S4	-42.6013	-22.6923
1xcr_A	experimental	C11orf54 LP4947 PTD012	Q9H0W9	-42.5883	-32.5769
1wf1_A	experimental	RALY HNRPCL2 P542	Q9UKM9	-42.5752	-27.9521
2p0k_A	experimental	SCMH1	Q96GD3	-42.5642	-31.8661
2npt_A	experimental	MAP2K5 MEK5 MKK5 PRKMK5	Q13163	-42.5609	-30.0642
1szb_A	experimental	MASP2	O00187	-42.518	-30.1076
2alr_A	experimental	AKR1A1 ALDR1 ALR	P14550	-42.5147	-34.5224
2exg_A	experimental	AFDN AF6 MLLT4	P55196	-42.5091	-33.0306
1m4u_A	experimental	NOG	Q13253	-42.5026	-26.5442
2i1n_A	experimental	DLG3 KIAA1232	Q92796	-42.4848	-29.7825
3efo_B	experimental	SEC24D KIAA0755	O94855	-42.4299	-33.4335
3s4y_A	experimental	TPK1	Q9H3S4	-42.4122	-23.159
3kus_A	experimental	PABPC1 PAB1 PABP1 PABPC2	P11940	-42.407	-26.1491
2nn6_B	experimental	EXOSC4 RRP41 SKI6	Q9NPD3	-42.3891	-36.5977
2vfk_A	experimental	AKAP7 AKAP18	Q9P0M2	-42.3842	-36.5787
2ql9_B	experimental	CASP7 MCH3	P55210	-42.3741	-33.7552
1k94_A	experimental	GCA GCL	P28676	-42.3716	-37.8014
1ujy_A	experimental	ARHGEF6 COOL2 KIAA0006 PIXA	Q15052	-42.3631	-35.8763
1o9s_B	experimental	SETD7 KIAA1717 KMT7 SET7 SET9	Q8WTS6	-42.362	-35.3571
2wns_A	experimental	UMPS OK/SW-cl.21	P11172	-42.3577	-32.463
1igm_H	experimental	NA	1IGM	-42.3536	-27.1147
2dyl_A	experimental	MAP2K7 JNKK2 MEK7 MKK7 PRKMK7 SKK4	O14733	-42.3497	-33.8063
2l76_A	experimental	NFATC2IP NIP45	Q8NCF5	-42.3394	-30.6396
2if7_A	experimental	SLAMF6 KALI UNQ6123/PRO20080	Q96DU3	-42.3183	-36.3094
3h8v_A	experimental	UBA5 UBE1DC1	Q9GZZ9	-42.3176	-31.3575
2edt_A	experimental	OBSCN KIAA1556 KIAA1639	Q5VST9	-42.3124	-30.8786
1hdo_A	experimental	BLVRB FLR	P30043	-42.2504	-32.1566
2xsn_A	experimental	TH TYH	P07101	-42.2317	-40.2256
3qj4_A	experimental	RNLS C10orf59	Q5VYX0	-42.2266	-37.3948
1k5n_B	experimental	B2M CDABP0092 HDCMA22P	P61769	-42.2253	-34.2976
2y5f_L	experimental	F10	P00742	-42.2238	-25.2466
3ecr_A	experimental	HMBS PBGD UPS	P08397	-42.2214	-33.7614
2pl3_A	experimental	DDX10	Q13206	-42.2077	-29.1663
2xjy_A	experimental	LMO2 RBTN2 RBTNL1 RHOM2 TTG2	P25791	-42.2022	-38.5072
2z0w_A	experimental	CLIP4 RSNL2	Q8N3C7	-42.2009	-40.5686
2ovx_A	experimental	MMP9 CLG4B	P14780	-42.2003	-38.7504
3saf_A	experimental	EXOSC10 PMSCL PMSCL2 RRP6	Q01780	-42.1995	-32.1973
3iu1_A	experimental	NMT1 NMT	P30419	-42.1982	-25.6896
3ghg_B	experimental	FGB	P02675	-42.1913	-31.1259
3bo5_A	experimental	SETMAR	Q53H47	-42.1894	-31.3363
3fby_A	experimental	COMP	P49747	-42.1792	-28.2572
2rlo_A	experimental	AGAP2 CENTG1 KIAA0167	Q99490	-42.1584	-28.0573
2ysr_A	experimental	DEPDC1 DEPDC1A	Q5TB30	-42.133	-30.3382
2vph_A	experimental	PTPN4	P29074	-42.1311	-34.5037
2djf_B	experimental	CTSC CPPI	P53634	-42.1205	-27.7542
1yx5_B	experimental	RPS27A UBA80 UBCEP1	P62979	-42.1047	-26.0809
2otp_A	experimental	LILRA2 ILT1 LIR7	Q8N149	-42.1047	-33.3599
1pdg_A	experimental	PDGFB PDGF2 SIS	P01127	-42.0791	-34.9001
2uxw_A	experimental	ACADVL VLCAD	P49748	-42.0623	-31.2371
1t6n_A	experimental	DDX39B BAT1 UAP56	Q13838	-42.0608	-30.1276
3ll6_A	experimental	GAK	O14976	-42.0483	-28.7356
3sxs_A	experimental	BMX	P51813	-42.0289	-33.4934
3o2g_A	experimental	BBOX1 BBH BBOX	O75936	-42.0285	-26.2478
2ofx_A	experimental	PAPSS1 ATPSK1 PAPSS	O43252	-42.02	-30.3959
1gvj_A	experimental	ETS1 EWSR2	P14921	-42.0185	-33.4953
2qbx_A	experimental	EPHB2 DRT EPHT3 EPTH3 ERK HEK5 TYRO5	P29323	-42.0112	-34.6163
2ce8_B	experimental	TLE1	Q04724	-42.0054	-39.693
1i76_A	experimental	MMP8 CLG1	P22894	-42.0038	-40.1396
3t2n_B	experimental	HPN TMPRSS1	P05981	-41.9897	-26.8699
2car_A	experimental	ITPA C20orf37 My049 OK/SW-cl.9	Q9BY32	-41.9886	-28.0373
1i1j_A	experimental	MIA	Q16674	-41.9859	-33.2038
2yup_A	experimental	SORBS3 SCAM1	O60504	-41.9768	-34.4087
2wqi_A	experimental	TP73 P73	O15350	-41.9756	-34.105
2hyi_C	experimental	EIF4A3 DDX48 KIAA0111	P38919	-41.9738	-33.3338
3qbt_C	experimental	RAB8A MEL RAB8	P61006	-41.9623	-29.4437
3v2b_A	experimental	PARP15 BAL3	Q460N3	-41.9588	-37.8782
2wh5_A	experimental	ACBD4 HMFT0700	Q8NC06	-41.9463	-28.8036
2qki_B	experimental	C3 CPAMD1	P01024	-41.9427	-36.445
3bzh_A	experimental	UBE2E1 UBCH6	P51965	-41.939	-33.3498
2ka4_B	experimental	STAT2	P52630	-41.935	-29.0268
3mao_A	experimental	MSRB1 SEPX1 HSPC270	Q9NZV6	-41.9349	-32.1483
2v3s_A	experimental	OXSR1 KIAA1101 OSR1	O95747	-41.9203	-28.4131
3t7a_A	experimental	PPIP5K2 HISPPD1 KIAA0433 VIP2	O43314	-41.9123	-28.8455
2dnu_A	experimental	SH3PXD2A FISH KIAA0418 SH3MD1 TKS5	Q5TCZ1	-41.9053	-33.3372
1jsg_A	experimental	TCL1A TCL1	P56279	-41.9026	-35.2994
3fd5_A	experimental	SEPHS1 SELD SPS SPS1	P49903	-41.8485	-36.8588
3kuc_B	experimental	RAF1 RAF	P04049	-41.8367	-30.9985
3hna_A	experimental	EHMT1 EUHMTASE1 GLP KIAA1876 KMT1D	Q9H9B1	-41.8347	-51.9415
1p5j_A	experimental	SDS SDH	P20132	-41.8304	-35.3928
2d9e_A	experimental	BRPF1 BR140	P55201	-41.8241	-30.9457
3fju_A	experimental	CPA1 CPA	P15085	-41.81	-24.3562
2dmb_A	experimental	FLNB FLN1L FLN3 TABP TAP	O75369	-41.8099	-32.4914
3glr_A	experimental	SIRT3 SIR2L3	Q9NTG7	-41.8042	-31.2001
2vkq_A	experimental	NT5C3A NT5C3 P5N1 UMPH1 HSPC233	Q9H0P0	-41.7873	-34.8515
3hhd_A	experimental	FASN FAS	P49327	-41.7844	NA
2aq0_A	experimental	ERCC4 ERCC11 XPF	Q92889	-41.7781	-40.0645
1ztg_A	experimental	PCBP1	Q15365	-41.7718	-29.3412
1d5v_A	experimental	FOXC2 FKHL14 MFH1	Q99958	-41.7626	-37.9477
2ke9_A	experimental	CASKIN2 KIAA1139	Q8WXE0	-41.7403	-35.6861
3i2n_A	experimental	WDR92	Q96MX6	-41.7172	-29.3982
2j5d_A	experimental	BNIP3 NIP3	Q12983	-41.7153	-32.0391
2w50_A	experimental	CDNF ARMETL1	Q49AH0	-41.7024	-33.8786
1jey_A	experimental	XRCC6 G22P1	P12956	-41.7003	-30.263
2yqg_A	experimental	DSG2 CDHF5	Q14126	-41.6812	-35.8371
2din_A	experimental	CDC5L KIAA0432 PCDC5RP	Q99459	-41.6805	-36.5994
3k1r_A	experimental	USH1C AIE75	Q9Y6N9	-41.6773	-35.7151
1aye_A	experimental	CPA2	P48052	-41.6719	-34.9422
3ksy_A	experimental	SOS1	Q07889	-41.6677	-31.4714
1saw_A	experimental	FAHD1 C16orf36 YISKL	Q6P587	-41.6596	-35.8068
1kwa_A	experimental	CASK LIN2	O14936	-41.6287	-30.3397
2gy5_A	experimental	TEK TIE2 VMCM VMCM1	Q02763	-41.6281	-35.6509
1hkk_A	experimental	CHIT1	Q13231	-41.6106	-26.7909
3h8o_A	experimental	ALKBH2 ABH2	Q6NS38	-41.6086	-34.8672
3ep6_A	experimental	AMD1 AMD	P17707	-41.6068	-35.0008
2qbw_A	experimental	ERBIN ERBB2IP KIAA1225 LAP2	Q96RT1	-41.6013	-41.7576
1uwy_A	experimental	CPM	P14384	-41.5983	-27.49
1zd9_A	experimental	ARL8A ARL10B GIE2	Q96BM9	-41.5774	-24.8167
1jma_A	experimental	NA	P57083	-41.5703	-31.5442
3py7_A	experimental	NA	3PY7	-41.5548	-27.6121
2v37_A	experimental	CDH13 CDHH	P55290	-41.5487	-32.8736
2d7o_A	experimental	FLNC ABPL FLN2	Q14315	-41.5407	-31.0217
2aze_A	experimental	TFDP1 DP1	Q14186	-41.5369	-26.8457
2dnq_A	experimental	RBM4B RBM30	Q9BQ04	-41.5346	-28.5461
3bn3_B	experimental	ICAM5 TLCN TLN	Q9UMF0	-41.5337	-33.2933
2fc9_A	experimental	NCL	P19338	-41.5275	-33.0528
3oes_A	experimental	RHEBL1	Q8TAI7	-41.5218	-33.6799
3p4u_A	experimental	CASP6 MCH2	P55212	-41.5117	-28.5206
3c6k_A	experimental	SMS	P52788	-41.5033	-27.528
1mco_H	experimental	NA	243866	-41.4976	-31.0612
2hi4_A	experimental	CYP1A2	P05177	-41.4928	-36.8751
1sgo_A	experimental	GSKIP C14orf129 HSPC210	Q9P0R6	-41.4881	-25.5234
2rra_A	experimental	NA	Q8N1H4	-41.4732	-39.1216
3p4l_A	experimental	NEO1 IGDCC2 NGN	Q92859	-41.4713	-29.3501
3rau_A	experimental	PTPN23 KIAA1471	Q9H3S7	-41.4556	-30.6999
2kkr_A	experimental	ATXN7 SCA7	O15265	-41.4358	-28.7412
1sg4_A	experimental	ECI1 DCI	P42126	-41.4297	-31.0675
2qlu_A	experimental	ACVR2B	Q13705	-41.4238	-34.0045
1pr9_A	experimental	DCXR SDR20C1	Q7Z4W1	-41.4127	-31.9822
2vxs_A	experimental	IL17A CTLA8 IL17	Q16552	-41.3917	-30.8358
1nub_A	experimental	SPARC ON	P09486	-41.387	-29.1246
2cg7_A	experimental	FN1 FN	P02751	-41.3642	-35.8465
1t38_A	experimental	MGMT	P16455	-41.364	-27.3341
2he9_A	experimental	NKTR	P30414	-41.3472	-31.5347
3vh8_G	experimental	KIR3DL1 CD158E NKAT3 NKB1	P43629	-41.3355	-30.0982
1ll8_A	experimental	PASK KIAA0135	Q96RG2	-41.3339	-32.1359
3ohu_A	experimental	BACH2	Q9BYV9	-41.3253	-30.908
2ffu_A	experimental	GALNT2	Q10471	-41.315	-31.5361
2e50_A	experimental	SET	Q01105	-41.3148	-33.9356
3lny_A	experimental	PTPN13 PNP1 PTP1E PTPL1	Q12923	-41.3124	-36.5951
1lqv_B	experimental	PROCR EPCR	Q9UNN8	-41.3038	-37.5944
1y4j_A	experimental	SUMF2 PSEC0171 UNQ1968/PRO4500	Q8NBJ7	-41.3035	-25.9378
2v9k_A	experimental	PUS10 CCDC139 DOBI	Q3MIT2	-41.2985	-36.3722
2dfk_B	experimental	CDC42	P60953	-41.2871	-33.8594
2dbj_A	experimental	MERTK MER	Q12866	-41.284	-31.51
3lqv_B	experimental	SF3B6 SAP14 SF3B14 SF3B14A CGI-110 HSPC175 HT006	Q9Y3B4	-41.271	-26.5185
3bfx_A	experimental	SULT1C2 SULT1C1	O00338	-41.2509	-21.2001
1du3_A	experimental	TNFRSF10B DR5 KILLER TRAILR2 TRICK2 ZTNFR9 UNQ160/PRO186	O14763	-41.2418	-29.0688
2qis_A	experimental	FDPS FPS KIAA1293	P14324	-41.2394	-26.1177
2h63_A	experimental	BLVRA BLVR BVR	P53004	-41.2389	-27.6563
1w3w_A	experimental	ANXA8 ANX8	P13928	-41.2293	-34.0353
2g76_A	experimental	PHGDH PGDH3	O43175	-41.2289	-37.3536
3mxn_B	experimental	RMI2 C16orf75	Q96E14	-41.216	-26.645
2q5e_A	experimental	CTDSP2 NIF2 OS4 SCP2	O14595	-41.2128	-29.7217
3pbl_A	experimental	DRD3	P35462	-41.197	-21.8231
1hfc_A	experimental	MMP1 CLG	P03956	-41.1942	-27.0844
3p1a_A	experimental	PKMYT1 MYT1	Q99640	-41.1924	-38.6065
1vec_A	experimental	DDX6 HLR2 RCK	P26196	-41.1821	-28.7897
3lf5_A	experimental	CYB5R4 NCB5OR	Q7L1T6	-41.1701	-34.6039
3f1s_A	experimental	SERPINA10 ZPI UNQ707/PRO1358	Q9UK55	-41.1566	-31.6393
2fei_A	experimental	CD2AP	Q9Y5K6	-41.1559	-36.6942
2a2n_A	experimental	PPWD1 KIAA0073	Q96BP3	-41.1447	-31.244
2vxt_I	experimental	IL18 IGIF IL1F4	Q14116	-41.1347	-27.7774
2o2t_A	experimental	MPDZ MUPP1	O75970	-41.1315	-32.7095
1e50_B	experimental	CBFB	Q13951	-41.1235	-35.2737
3pff_A	experimental	ACLY	P53396	-41.1197	-34.0835
2da0_A	experimental	ASAP1 DDEF1 KIAA1249	Q9ULH1	-41.1178	-27.0635
3c5h_A	experimental	ARHGAP35 GRF1 GRLF1 KIAA1722 P190A p190ARHOGAP	Q9NRY4	-41.0968	-37.0428
1qmn_A	experimental	SERPINA3 AACT GIG24 GIG25	P01011	-41.0875	-32.5496
1yh2_A	experimental	UBE2T HSPC150 PIG50	Q9NPD8	-41.0816	-33.6374
2ee0_A	experimental	PCDH9	Q9HC56	-41.0782	-33.8901
1pso_E	experimental	NA	P00790	-41.0763	-32.0741
3ov1_A	experimental	GRB2 ASH	P62993	-41.0721	-28.2833
1jwh_B	experimental	CSNK2A1 CK2A1	P68400	-41.0688	-34.2878
1icf_C	experimental	CTSL CTSL1	P07711	-41.0619	-31.6801
2p23_A	experimental	FGF19 UNQ334/PRO533	O95750	-41.0509	-31.608
2dzm_A	experimental	FAF1 UBXD12 UBXN3A CGI-03	Q9UNN5	-41.0398	-30.9268
1o9a_A	experimental	FN1 FN	P02751	-41.0369	-34.6825
3ihx_A	experimental	PRDM10 KIAA1231 PFM7 TRIS	Q9NQV6	-41.0344	-27.7451
1htr_B	experimental	PGC	P20142	-41.0323	-35.1469
3h91_A	experimental	CBX2	Q14781	-41.0321	-30.8199
1wmh_B	experimental	PARD6A PAR6A	Q9NPB6	-41.0301	-35.4526
2yul_A	experimental	SOX17	Q9H6I2	-41.0241	-33.2403
2ceo_A	experimental	SERPINA7 TBG	P05543	-41.0228	-35.3436
2d9w_A	experimental	DOK2	O60496	-41.0223	-33.8602
2epr_A	experimental	PATZ1 PATZ RIAZ ZBTB19 ZNF278 ZSG	Q9HBE1	-41.0172	-24.1618
2krb_A	experimental	EIF3B EIF3S9	P55884	-41.0027	-29.2775
1ueq_A	experimental	MAGI2 ACVRINP1 AIP1 KIAA0705	Q86UL8	-41.0001	-34.8501
1d3b_B	experimental	SNRPB COD SNRPB1	P14678	-40.9682	-26.2563
2wm9_A	experimental	DOCK9 KIAA1058	Q9BZ29	-40.9598	-29.1712
3l6x_A	experimental	CTNND1 KIAA0384	O60716	-40.9393	-30.7503
3i4u_A	experimental	DHX8 DDX8	Q14562	-40.9252	-37.4324
3s6c_A	experimental	B2M CDABP0092 HDCMA22P	P61769	-40.9135	-33.3778
2g30_A	experimental	AP2B1 ADTB2 CLAPB1	P63010	-40.9117	-31.8855
2kmz_A	experimental	TNFRSF12A FN14	Q9NP84	-40.904	-32.4388
1gkn_A	experimental	CR1 C3BR	P17927	-40.8917	-28.8187
2wtk_C	experimental	STK11 LKB1 PJS	Q15831	-40.8892	-30.178
2cpm_A	experimental	SPAG7	O75391	-40.8875	-25.1214
2daf_A	experimental	IQUB	Q8NA54	-40.885	-37.579
2wm1_A	experimental	ACMSD	Q8TDX5	-40.8822	-27.6735
2ycf_A	experimental	CHEK2 CDS1 CHK2 RAD53	O96017	-40.8734	-33.923
2dgu_A	experimental	SYNCRIP HNRPQ NSAP1	O60506	-40.8663	-29.8488
1uhp_A	experimental	PDZRN3 KIAA1095 LNX3 SEMCAP3	Q9UPQ7	-40.8643	-29.2465
3thw_A	experimental	MSH2	P43246	-40.8564	-33.345
1zlm_A	experimental	OSTF1	Q92882	-40.8528	-30.8477
1p57_B	experimental	HPN TMPRSS1	P05981	-40.8461	-31.8256
2efi_A	experimental	MORF4L1 MRG15 FWP006 HSPC008 HSPC061 PP368	Q9UBU8	-40.8374	-31.1667
2bz6_H	experimental	F7	P08709	-40.8306	-30.7284
2jjk_A	experimental	FBP1 FBP	P09467	-40.8015	-31.6787
2a25_A	experimental	SIAH1 HUMSIAH	Q8IUQ4	-40.7976	-30.4106
2dkr_A	experimental	LIN7B MALS2 VELI2 UNQ3116/PRO10200	Q9HAP6	-40.7918	-30.3771
2p6n_A	experimental	DDX41 ABS	Q9UJV9	-40.7669	-30.5324
2wax_A	experimental	DDX6 HLR2 RCK	P26196	-40.7654	-29.5101
3sei_A	experimental	CASKIN1 KIAA1306	Q8WXD9	-40.7434	-24.7022
2dmt_A	experimental	BARX1	Q9HBU1	-40.7432	-32.033
2ent_A	experimental	KLF15 KKLF	Q9UIH9	-40.7304	-38.9198
2vif_A	experimental	SOCS6 CIS4 SOCS4	O14544	-40.7151	-36.3539
1f0y_A	experimental	HADH HAD HADHSC SCHAD	Q16836	-40.704	-29.3054
1q38_A	experimental	FN1 FN	P02751	-40.6983	-30.6919
3ije_A	experimental	ITGAV MSK8 VNRA	P06756	-40.6944	-22.9873
2krk_A	experimental	PSMC5 SUG1	P62195	-40.6556	-27.6096
2ec1_A	experimental	NUP50 NPAP60L PRO1146	Q9UKX7	-40.6517	-38.325
1vzo_A	experimental	RPS6KA5 MSK1	O75582	-40.6443	-29.4293
2ys3_A	experimental	FERMT3 KIND3 MIG2B URP2	Q86UX7	-40.6392	-36.6933
1n5u_A	experimental	ALB GIG20 GIG42 PRO0903 PRO1708 PRO2044 PRO2619 PRO2675 UNQ696/PRO1341	P02768	-40.6354	-36.1514
2e63_A	experimental	NEURL4 KIAA1787	Q96JN8	-40.6294	-32.6988
3g3e_A	experimental	DAO DAMOX	P14920	-40.6235	-38.2968
1jey_B	experimental	XRCC5 G22P2	P13010	-40.6123	-37.2157
1x5t_A	experimental	SF3B4 SAP49	Q15427	-40.6111	-21.9271
2ljr_A	experimental	GSTT2	P0CG29	-40.6088	-38.9683
1kdu_A	experimental	PLAU	P00749	-40.5941	-32.7813
3ldq_B	experimental	BAG1 HAP	Q99933	-40.5622	-28.3298
2djf_C	experimental	CTSC CPPI	P53634	-40.5598	-30.9396
2wfq_A	experimental	DHH	O43323	-40.5506	-33.286
1hyn_P	experimental	SLC4A1 AE1 DI EPB3	P02730	-40.5419	-38.1163
2z15_A	experimental	TOB1 TOB TROB1	P50616	-40.5275	-33.9332
2rky_A	experimental	FN1 FN	P02751	-40.5071	-30.711
3pbh_A	experimental	CTSB CPSB	P07858	-40.5056	-28.7512
2nvu_B	experimental	UBA3 UBE1C	Q8TBC4	-40.5048	-33.5158
3hlt_A	experimental	HDHD2	Q9H0R4	-40.4961	-27.3104
1zrh_A	experimental	HS3ST1 3OST 3OST1	O14792	-40.4845	-38.2613
2wkq_A	experimental	RAC1 TC25 MIG5	P63000	-40.4589	-35.817
2cot_A	experimental	ZSCAN16 ZNF392 ZNF435	Q9H4T2	-40.4543	-34.3303
1gt0_C	experimental	POU2F1 OCT1 OTF1	P14859	-40.4524	-33.517
2dlp_A	experimental	MYO15B KIAA1783 MYO15BP	Q96JP2	-40.4308	-36.2907
2fzw_A	experimental	ADH5 ADHX FDH	P11766	-40.4289	-29.9501
1pyo_B	experimental	CASP2 ICH1 NEDD2	P42575	-40.4229	-34.9905
2v5e_B	experimental	GDNF	P39905	-40.4131	-28.0177
2ysa_A	experimental	RBBP6 P2PR PACT RBQ1 My038	Q7Z6E9	-40.404	-28.3909
1r1h_A	experimental	MME EPN	P08473	-40.3991	-33.322
2f3i_A	experimental	POLR2H	P52434	-40.3933	-27.8338
1dok_A	experimental	CCL2 MCP1 SCYA2	P13500	-40.3801	-31.7837
3q3j_B	experimental	RND1 RHO6	Q92730	-40.372	-31.5602
1hy7_A	experimental	MMP3 STMY1	P08254	-40.3416	-37.6669
3eqc_A	experimental	MAP2K1 MEK1 PRKMK1	Q02750	-40.334	-34.5466
1es0_B	experimental	GAD2 GAD65	Q05329	-40.3245	-29.7807
1qbh_A	experimental	BIRC2 API1 MIHB RNF48	Q13490	-40.3222	-27.8355
3mbw_A	experimental	EPHA2 ECK	P29317	-40.3188	-25.8736
2d9b_A	experimental	GTF2I BAP135 WBSCR6	P78347	-40.3181	-18.9931
1uvq_A	experimental	HLA-DQA1	P01909	-40.3121	-32.6106
1vig_A	experimental	HDLBP HBP VGL	Q00341	-40.2877	-28.7154
1ufw_A	experimental	SYNJ2 KIAA0348	O15056	-40.286	-30.8317
3bch_A	experimental	RPSA LAMBR LAMR1	P08865	-40.2771	-26.8473
1djl_A	experimental	NNT	Q13423	-40.263	-34.0141
3o5d_A	experimental	FKBP5 AIG6 FKBP51	Q13451	-40.2602	-27.7585
2csw_A	experimental	RNF8 KIAA0646	O76064	-40.258	-25.1962
2vz5_A	experimental	TAX1BP3 TIP1	O14907	-40.248	-28.9538
1z6t_A	experimental	APAF1 KIAA0413	O14727	-40.2395	NA
1kwm_A	experimental	CPB1 CPB PCPB	P15086	-40.2317	-30.1324
2pz1_A	experimental	ARHGEF4 KIAA1112	Q9NR80	-40.2278	-36.2602
3b2u_H	experimental	IGH@	Q6GMX6	-40.2272	-25.1814
1yse_A	experimental	SATB1	Q01826	-40.2266	-30.0877
1v04_A	experimental	PON1 PON	P27169	-40.2222	-34.925
2di7_A	experimental	KDELC1 EP58 UNQ1910/PRO4357	Q6UW63	-40.2173	-31.9399
3dpk_A	experimental	CSF1R FMS	P07333	-40.2059	-28.6299
1xg5_A	experimental	DHRS11 SDR24C1 UNQ836/PRO1774	Q6UWP2	-40.1967	-38.1337
2o95_A	experimental	PSMD7 MOV34L	P51665	-40.1919	-29.1927
2dha_A	experimental	ESRP1 RBM35A	Q6NXG1	-40.1792	-27.4633
2do0_A	experimental	HNRNPM HNRPM NAGR1	P52272	-40.1676	-35.6796
2a2r_A	experimental	GSTP1 FAEES3 GST3	P09211	-40.1623	-31.0887
3rgk_A	experimental	MB	P02144	-40.1532	NA
2xhi_A	experimental	OGG1 MMH MUTM OGH1	O15527	-40.1511	-26.7045
3gbn_H	experimental	NA	3GBN	-40.1465	-29.7389
3ews_A	experimental	DDX19B DBP5 DDX19 TDBP	Q9UMR2	-40.1419	-31.5439
2rkb_A	experimental	SDSL	Q96GA7	-40.1357	-37.1813
2y05_A	experimental	PTGR1 LTB4DH	Q14914	-40.1349	-31.6822
1x9q_A	experimental	NA	1X9Q	-40.1197	-41.5329
1wrm_A	experimental	DUSP22 JSP1 LMWDSP2 MKPX	Q9NRW4	-40.1077	-26.3874
2ct2_A	experimental	TRIM32 HT2A	Q13049	-40.0943	-23.5635
1elv_A	experimental	C1S	P09871	-40.0634	-29.7978
2ask_A	experimental	ARTN EVN	Q5T4W7	-40.0608	-34.8573
1b72_A	experimental	HOXB1 HOX2I	P14653	-40.0578	-29.6044
3s93_A	experimental	TDRD5	Q8NAT2	-40.0517	-29.7481
2he4_A	experimental	SLC9A3R2 NHERF2	Q15599	-40.0513	-31.1898
1hlz_A	experimental	NR1D1 EAR1 HREV THRAL	P20393	-40.0483	-29.6629
3fhr_A	experimental	MAPKAPK3	Q16644	-40.0475	-35.9577
2ha8_A	experimental	TARBP1 TRM3 TRP185	Q13395	-40.0437	-32.3564
3mr2_A	experimental	POLH RAD30 RAD30A XPV	Q9Y253	-40.0358	-22.0618
1um1_A	experimental	RADIL KIAA1849	Q96JH8	-40.0323	-35.7867
2dew_X	experimental	PADI4 PAD4 PADI5 PDI5	Q9UM07	-40.0284	-31.7268
2gf0_A	experimental	DIRAS1 GBTS1 RIG	O95057	-40.0153	-28.6942
2b5i_D	experimental	IL2RA	P01589	-39.995	-29.1069
2w4l_A	experimental	DCTD	P32321	-39.9947	-37.0481
3buv_A	experimental	AKR1D1 SRD5B1	P51857	-39.9853	-35.2069
1cb0_A	experimental	MTAP MSAP	Q13126	-39.9815	-25.9601
2z7x_B	experimental	TLR1 KIAA0012	Q15399	-39.9719	-28.1376
3ldz_A	experimental	STAM STAM1	Q92783	-39.9673	-21.9731
2vre_A	experimental	ECH1	Q13011	-39.9627	-30.4769
1lcf_A	experimental	LTF GIG12 LF	P02788	-39.9594	-42.0844
3otc_A	experimental	THG1L ICF45	Q9NWX6	-39.9532	-30.6832
1v5w_A	experimental	DMC1 DMC1H LIM15	Q14565	-39.9517	-26.5413
1x5s_A	experimental	CIRBP A18HNRNP CIRP	Q14011	-39.9516	-24.8132
3emw_A	experimental	SPSB2 GRCC9 SSB2	Q99619	-39.9489	-32.3859
2dkz_A	experimental	GAREM1 C18orf11 FAM59A GAREM	Q9H706	-39.9455	-31.3271
2gzv_A	experimental	PICK1 PRKCABP	Q9NRD5	-39.9405	-34.9501
2wjy_A	experimental	UPF1 KIAA0221 RENT1	Q92900	-39.9393	-35.7065
3gp0_A	experimental	MAPK11 PRKM11 SAPK2 SAPK2B	Q15759	-39.9389	-37.1965
1pdr_A	experimental	DLG1	Q12959	-39.9342	-29.4845
2xqn_T	experimental	TES	Q9UGI8	-39.9325	-36.3793
1r2b_B	experimental	BCL6 BCL5 LAZ3 ZBTB27 ZNF51	P41182	-39.9319	-30.6549
1pc2_A	experimental	FIS1 TTC11 CGI-135	Q9Y3D6	-39.8867	-33.773
1zli_A	experimental	CPB1 CPB PCPB	P15086	-39.8844	-22.9994
2pq8_A	experimental	KAT8 MOF MYST1 PP7073	Q9H7Z6	-39.8807	-27.0305
3ap1_A	experimental	TPST2	O60704	-39.8782	-41.64
2v1w_A	experimental	PDLIM4 RIL	P50479	-39.8634	-27.925
2znd_A	experimental	PDCD6 ALG2	O75340	-39.8629	-33.9495
1wsr_A	experimental	AMT GCST	P48728	-39.8564	-29.5258
1pbk_A	experimental	FKBP3 FKBP25	Q00688	-39.8491	-28.6155
1ivh_A	experimental	IVD	P26440	-39.8223	-34.9078
1gsm_A	experimental	MADCAM1	Q13477	-39.822	-27.4738
1ntg_A	experimental	YARS	P54577	-39.8113	-37.9936
1rx0_A	experimental	ACAD8 ARC42 IBD	Q9UKU7	-39.793	-34.7055
3tht_A	experimental	ALKBH8 ABH8	Q96BT7	-39.7848	-37.9579
1tvx_A	experimental	PPBP CTAP3 CXCL7 SCYB7 TGB1 THBGB1	P02775	-39.7843	-33.3968
1now_A	experimental	HEXB HCC7	P07686	-39.7833	-37.2984
2eea_A	experimental	FLNB FLN1L FLN3 TABP TAP	O75369	-39.7822	-30.0146
2xsq_A	experimental	NUDT16	Q96DE0	-39.7681	-33.0254
3h6l_A	experimental	SETD2 HIF1 HYPB KIAA1732 KMT3A SET2 HSPC069	Q9BYW2	-39.7577	-30.9421
2h00_A	experimental	METTL16 METT10D	Q86W50	-39.7541	-28.3502
2lct_A	experimental	VAV1 VAV	P15498	-39.7489	-27.197
1dyn_A	experimental	DNM1 DNM	Q05193	-39.7463	-28.1034
3doe_A	experimental	ARL2	P36404	-39.7462	-33.4868
2ror_A	experimental	VAV1 VAV	P15498	-39.7302	-25.2492
2pa1_A	experimental	PDLIM2 PP6345	Q96JY6	-39.7165	-29.1381
1l6j_A	experimental	MMP9 CLG4B	P14780	-39.715	-35.4241
2e8m_A	experimental	EPS8	Q12929	-39.7119	-27.9898
2i7v_A	experimental	CPSF3 CPSF73	Q9UKF6	-39.7081	-34.3047
1hdr_A	experimental	QDPR DHPR SDR33C1	P09417	-39.7014	-29.0294
3g9w_B	experimental	NA	Q71LX4	-39.6982	-32.5234
2y4i_B	experimental	KSR2	Q6VAB6	-39.6824	-37.1804
2klq_A	experimental	MCM6	Q14566	-39.6813	-31.3554
3ifw_A	experimental	UCHL1	P09936	-39.6759	-32.1447
3zxh_A	experimental	MMP13	P45452	-39.675	-34.8262
1h3i_A	experimental	SETD7 KIAA1717 KMT7 SET7 SET9	Q8WTS6	-39.6686	-28.0414
1war_A	experimental	ACP5	P13686	-39.6638	-33.5805
2kna_A	experimental	XIAP API3 BIRC4 IAP3	P98170	-39.6626	-30.8246
1i0z_A	experimental	LDHB	P07195	-39.6622	-31.5626
1v05_A	experimental	FLNC ABPL FLN2	Q14315	-39.6622	-27.1739
2dks_A	experimental	CEACAM8 CGM6	P31997	-39.6617	-28.3515
3rgf_A	experimental	CDK8	P49336	-39.6585	-32.9864
2hqq_A	experimental	KHK	P50053	-39.6547	-34.5062
3po1_C	experimental	F2	P00734	-39.6499	-30.8833
2dl3_A	experimental	SORBS1 KIAA0894 KIAA1296 SH3D5	Q9BX66	-39.6475	-28.6241
2boa_A	experimental	CPA4 CPA3 UNQ694/PRO1339	Q9UI42	-39.6342	-29.5057
2i7a_A	experimental	CAPN13	Q6MZZ7	-39.6212	-30.7612
2jq8_A	experimental	VTN	P04004	-39.6179	-17.7008
2hh0_H	experimental	NA	2HH0	-39.6177	-30.6207
1eak_A	experimental	MMP2 CLG4A	P08253	-39.6047	-33.3052
2bw0_A	experimental	ALDH1L1 FTHFD	O75891	-39.6023	-32.4608
2csk_A	experimental	SNX12	Q9UMY4	-39.5986	-30.6668
2fg5_A	experimental	RAB31 RAB22B	Q13636	-39.5985	-30.5675
1rrp_B	experimental	RANBP2 NUP358	P49792	-39.5979	-31.1457
2p3w_A	experimental	HTRA3 PRSP	P83110	-39.596	-36.2047
2he2_A	experimental	DLG2	Q15700	-39.5933	-34.9018
3eml_A	experimental	ADORA2A ADORA2	P29274	-39.5655	-25.2264
2xub_A	experimental	POLR3C	Q9BUI4	-39.5638	-30.8281
2jgz_B	experimental	CCNB1 CCNB	P14635	-39.5598	-30.8569
1c7c_A	experimental	HBA1; HBA2	P69905	-39.5509	-29.5449
1m6d_A	experimental	CTSF	Q9UBX1	-39.5503	-28.8047
2b8w_A	experimental	GBP1	P32455	-39.5449	-33.2103
2a9m_H	experimental	NA	2A9M	-39.5395	-30.1441
1zjk_A	experimental	MASP2	O00187	-39.5373	-33.3876
1bak_A	experimental	GRK2 ADRBK1 BARK BARK1	P25098	-39.5366	-36.1553
1ng2_A	experimental	NCF1 NOXO2 SH3PXD1A	P14598	-39.5241	-31.8274
1ibx_A	experimental	DFFB CAD DFF2 DFF40	O76075	-39.5073	-30.8924
3cu7_A	experimental	C5 CPAMD4	P01031	-39.5045	-31.7622
2cs8_A	experimental	ST18 KIAA0535 ZNF387	O60284	-39.4988	-22.8559
1qk1_A	experimental	CKMT1A CKMT; CKMT1B CKMT	P12532	-39.4942	-27.8662
2r83_A	experimental	SYT1 SVP65 SYT	P21579	-39.4889	-28.8509
2nzl_A	experimental	HAO1 GOX1 HAOX1	Q9UJM8	-39.4881	-38.2433
1d9n_A	experimental	MBD1 CXXC3 PCM1	Q9UIS9	-39.4834	-35.3891
3kvq_A	experimental	KDR FLK1 VEGFR2	P35968	-39.4744	-17.0931
3puf_C	experimental	RNASEH2C AYP1	Q8TDP1	-39.4712	-31.0767
2edp_A	experimental	SHROOM4 KIAA1202 SHAP	Q9ULL8	-39.4699	-33.4736
1q92_A	experimental	NT5M DNT2	Q9NPB1	-39.4626	-39.1723
3soc_A	experimental	ACVR2A ACVR2	P27037	-39.4617	-34.3781
1bv8_A	experimental	A2M CPAMD5 FWP007	P01023	-39.4612	-26.7826
3pm0_A	experimental	CYP1B1	Q16678	-39.459	NA
3gqc_A	experimental	REV1 REV1L	Q9UBZ9	-39.4578	-33.0561
2x5y_A	experimental	ZC3HAV1 ZC3HDC2 PRO1677	Q7Z2W4	-39.4444	-25.6209
3bi1_A	experimental	FOLH1 FOLH NAALAD1 PSM PSMA GIG27	Q04609	-39.4376	-31.2899
1mg4_A	experimental	DCLK1 DCAMKL1 DCDC3A KIAA0369	O15075	-39.4361	-31.9438
1bik_A	experimental	AMBP HCP ITIL	P02760	-39.4356	-28.9389
3llk_A	experimental	QSOX1 QSCN6 UNQ2520/PRO6013	O00391	-39.4355	-21.8897
1sl6_A	experimental	CLEC4M CD209L CD209L1 CD299	Q9H2X3	-39.4341	-39.023
2j9l_A	experimental	CLCN5 CLCK2	P51795	-39.4337	-46.8153
2acx_A	experimental	GRK6 GPRK6	P43250	-39.4302	-34.1366
1x63_A	experimental	FHL1 SLIM1	Q13642	-39.4275	-28.3454
2emy_A	experimental	ZNF268	Q14587	-39.4191	-34.0911
3qnt_A	experimental	NPC1L1	Q9UHC9	-39.41	-29.8046
2ej7_A	experimental	DNAJB3 HCG3	Q8WWF6	-39.3983	-33.4987
3aqq_A	experimental	CARHSP1	Q9Y2V2	-39.3883	-26.9621
2x7z_A	experimental	DLG1	Q12959	-39.3868	-30.3769
2ve7_A	experimental	NDC80 HEC HEC1 KNTC2	O14777	-39.3598	-25.2633
3ndd_A	experimental	SERPINA1 AAT PI PRO0684 PRO2209	P01009	-39.3564	-33.4675
2e9g_A	experimental	AP1G2	O75843	-39.3418	-31.5686
2ecz_A	experimental	SORBS1 KIAA0894 KIAA1296 SH3D5	Q9BX66	-39.3407	-31.1363
1tmc_A	experimental	HLA-A HLAA	P01891	-39.3298	-24.8792
3fe1_A	experimental	HSPA6 HSP70B'	P17066	-39.3274	-26.9864
3c4h_A	experimental	PARP3 ADPRT3 ADPRTL3	Q9Y6F1	-39.3258	-29.6322
2dko_A	experimental	CASP3 CPP32	P42574	-39.3213	-33.429
2g7b_A	experimental	CRABP2	P29373	-39.3102	-26.151
2jbm_A	experimental	QPRT	Q15274	-39.3048	-30.7105
3ow8_A	experimental	WDR61	Q9GZS3	-39.2833	-29.6545
2dl8_A	experimental	SRGAP2 ARHGAP34 FNBP2 KIAA0456 SRGAP2A	O75044	-39.2682	-25.824
2jp0_A	experimental	CD5 LEU1	P06127	-39.2569	-28.6611
3sqd_A	experimental	PAXIP1 PAXIP1L PTIP CAGF28	Q6ZW49	-39.2511	-28.264
1k8f_A	experimental	CAP1 CAP	Q01518	-39.2504	-27.8341
3kvh_A	experimental	NUDT16L1 SDOS	Q9BRJ7	-39.2451	-35.9854
3gni_B	experimental	STRADA LYK5 STRAD	Q7RTN6	-39.2447	-35.1914
2f8x_C	experimental	RBPJ IGKJRB IGKJRB1 RBPJK RBPSUH	Q06330	-39.2407	-30.6972
2pso_A	experimental	STARD13 DLC2 GT650	Q9Y3M8	-39.2354	-27.3285
2dgy_A	experimental	EIF1AD	Q8N9N8	-39.2092	-28.9622
1ohe_A	experimental	CDC14B	O60729	-39.2072	-22.4537
3c5e_A	experimental	ACSM2A ACSM2 MACS2	Q08AH3	-39.201	-34.3958
2xyc_A	experimental	NCAM2 NCAM21	O15394	-39.2004	-26.6786
2rb4_A	experimental	DDX25 GRTH	Q9UHL0	-39.1987	-33.6866
1eaz_A	experimental	PLEKHA1 TAPP1	Q9HB21	-39.1968	-32.4279
2nn6_C	experimental	EXOSC8 OIP2 RRP43	Q96B26	-39.1932	-29.1945
1dgf_A	experimental	CAT	P04040	-39.1923	-36.0579
3kv5_D	experimental	KDM7A JHDM1D KDM7 KIAA1718	Q6ZMT4	-39.1842	-27.0548
2zb4_A	experimental	PTGR2 ZADH1	Q8N8N7	-39.1752	-35.8273
3kjd_A	experimental	PARP2 ADPRT2 ADPRTL2	Q9UGN5	-39.1576	-32.693
1xk5_A	experimental	SNUPN RNUT1 SPN1	O95149	-39.1565	-33.1826
3cx2_A	experimental	MYBPC3	Q14896	-39.1564	-27.1768
2joa_A	experimental	HTRA1 HTRA PRSS11	Q92743	-39.1527	-31.1208
2dgt_A	experimental	RBM4B RBM30	Q9BQ04	-39.1479	-27.3869
3riy_A	experimental	SIRT5 SIR2L5	Q9NXA8	-39.1422	-38.2146
1je6_A	experimental	MICB PERB11.2	Q29980	-39.1379	NA
2wl1_A	experimental	MEFV MEF TRIM20	O15553	-39.13	-28.3839
3aaf_A	experimental	WRN RECQ3 RECQL2	Q14191	-39.1272	-25.5234
1olm_A	experimental	SEC14L2 C22orf6 KIAA1186 KIAA1658	O76054	-39.1181	-13.786
2dno_A	experimental	NA	Q5SZQ7	-39.1035	-26.4042
3n9y_A	experimental	CYP11A1 CYP11A	P05108	-39.0951	-26.5154
3t5d_A	experimental	SEPT7 CDC10	Q16181	-39.0878	-35.5402
2xdp_A	experimental	KDM4C GASC1 JHDM3C JMJD2C KIAA0780	Q9H3R0	-39.0715	-30.3668
1m7b_A	experimental	RND3 ARHE RHO8 RHOE	P61587	-39.0709	-31.1584
2edb_A	experimental	DCC IGDCC1	P43146	-39.0561	-29.599
3iu5_A	experimental	PBRM1 BAF180 PB1	Q86U86	-39.0543	-29.4068
2ql9_A	experimental	CASP7 MCH3	P55210	-39.052	-32.0962
2p57_A	experimental	ARFGAP2 ZNF289 Nbla10535	Q8N6H7	-39.0513	-31.5897
3ex7_D	experimental	CASC3 MLN51	O15234	-39.0458	-34.1776
1dle_A	experimental	CFB BF BFD	P00751	-39.0382	-32.0868
2x89_A	experimental	B2M CDABP0092 HDCMA22P	P61769	-39.0374	-27.8588
3mjk_A	experimental	PDGFA PDGF1	P04085	-39.0305	-31.2927
1rpm_A	experimental	PTPRM PTPRL1	P28827	-39.029	-24.7896
1qmb_B	experimental	SERPINA1 AAT PI PRO0684 PRO2209	P01009	-39.0277	-32.3298
2e9i_A	experimental	FLNB FLN1L FLN3 TABP TAP	O75369	-39.0258	-32.43
2g6b_A	experimental	RAB26	Q9ULW5	-39.0236	-31.7105
3bej_B	experimental	NR1H4 BAR FXR HRR1 RIP14	Q96RI1	-39.0143	-32.5844
2kxs_A	experimental	TJP1 ZO1	Q07157	-39.0111	-22.4549
2ohf_A	experimental	OLA1 GTPBP9 PRO2455 PTD004	Q9NTK5	-39.0089	-38.9688
2jkv_A	experimental	PGD PGDH	P52209	-38.9983	-32.4974
1s1e_A	experimental	KCNIP1 KCHIP1 VABP	Q9NZI2	-38.9874	-29.3077
2y9a_B	experimental	SNRPD1	P62314	-38.9831	-32.6345
2z6o_A	experimental	UFC1 CGI-126 HSPC155	Q9Y3C8	-38.9825	-27.6249
1i16_A	experimental	IL16	Q14005	-38.981	-27.3479
2eel_A	experimental	CIDEA	O60543	-38.9808	-39.8603
1l3y_A	experimental	ITGB2 CD18 MFI7	P05107	-38.9745	-31.439
2dwy_A	experimental	GGA1	Q9UJY5	-38.9722	-29.7364
2enp_A	experimental	SYT17	Q9BSW7	-38.9714	-23.9387
1fzc_E	experimental	FGB	P02675	-38.968	-31.3522
2kmv_A	experimental	ATP7A MC1 MNK	Q04656	-38.9645	-23.8634
2hup_A	experimental	RAB43 RAB41	Q86YS6	-38.9578	-25.6199
1woj_A	experimental	CNP	P09543	-38.9542	-28.8917
1ilk_A	experimental	IL10	P22301	-38.9532	-28.9725
1wym_A	experimental	TAGLN2 KIAA0120 CDABP0035	P37802	-38.9519	-24.0478
3oai_A	experimental	NA	D3QK41	-38.9466	-35.8217
2jw2_A	experimental	STARD13 DLC2 GT650	Q9Y3M8	-38.9444	-28.5629
3o4r_A	experimental	DHRS4 SDR25C2 UNQ851/PRO1800	Q9BTZ2	-38.9419	-31.6881
3thw_B	experimental	MSH3 DUC1 DUG	P20585	-38.9316	-27.8287
2f5k_A	experimental	MORF4L1 MRG15 FWP006 HSPC008 HSPC061 PP368	Q9UBU8	-38.9309	-31.4658
3lb6_A	experimental	IL13 NC30	P35225	-38.9252	-26.0661
1bo1_A	experimental	PIP4K2B PIP5K2B	P78356	-38.9211	-28.3318
2gdz_A	experimental	HPGD PGDH1 SDR36C1	P15428	-38.9169	-34.0134
3ixs_A	experimental	RNF2 BAP1 DING HIPI3 RING1B	Q99496	-38.9163	-34.0091
1qlz_A	experimental	PRNP ALTPRP PRIP PRP	P04156	-38.9133	-29.458
1x5c_A	experimental	P4HB ERBA2L PDI PDIA1 PO4DB	P07237	-38.912	-34.8974
3coo_A	experimental	SPON1 KIAA0762 VSGP	Q9HCB6	-38.9096	-28.2947
2i59_A	experimental	RGS10	O43665	-38.9091	-26.638
1g9o_A	experimental	SLC9A3R1 NHERF NHERF1	O14745	-38.9027	-30.5421
1zn8_A	experimental	APRT	P07741	-38.8984	-31.1958
3fau_A	experimental	N4BP2 B3BP KIAA1413	Q86UW6	-38.8969	-27.0052
2jif_A	experimental	ACADSB	P45954	-38.8744	-35.7712
2jxb_A	experimental	NCK2 GRB4	O43639	-38.8701	-34.446
2fvz_A	experimental	IMPA2 IMP.18P	O14732	-38.869	-37.501
2g4b_A	experimental	U2AF2 U2AF65	P26368	-38.8665	-31.1739
1z57_A	experimental	CLK1 CLK	P49759	-38.8658	-32.3113
1txd_A	experimental	ARHGEF12 KIAA0382 LARG	Q9NZN5	-38.8646	-34.1123
1iyf_A	experimental	PARK2 PRKN	O60260	-38.8633	-27.9947
2xss_A	experimental	PDE5A PDE5	O76074	-38.8578	-31.857
1j8e_A	experimental	LRP1 A2MR APR	Q07954	-38.8569	-28.9448
1lgp_A	experimental	CHFR RNF196	Q96EP1	-38.8565	-33.7282
2gra_A	experimental	PYCR1	P32322	-38.8504	-35.5159
3gvp_A	experimental	AHCYL2 KIAA0828	Q96HN2	-38.8442	-20.6608
2ocb_A	experimental	RAB9B RAB9L	Q9NP90	-38.8288	-30.3739
2wnv_B	experimental	C1QB	P02746	-38.8263	-34.0779
3crd_A	experimental	CRADD RAIDD	P78560	-38.8237	-26.7919
3gdh_A	experimental	TGS1 HCA137 NCOA6IP PIMT	Q96RS0	-38.8127	-43.7499
3b7s_A	experimental	LTA4H LTA4	P09960	-38.8084	-35.8148
2kkq_A	experimental	MYOT TTID	Q9UBF9	-38.8082	-35.7758
2nn6_E	experimental	EXOSC7 KIAA0116 RRP42	Q15024	-38.8059	-29.7131
2e7m_A	experimental	KIAA0319	Q5VV43	-38.8052	-31.0199
2edu_A	experimental	KIF22 KID KNSL4	Q14807	-38.7986	-32.8464
1qql_A	experimental	NA	1QQL	-38.7951	-28.8587
3n8e_A	experimental	HSPA9 GRP75 HSPA9B mt-HSP70	P38646	-38.7946	-28.4343
1w98_B	experimental	CCNE1 CCNE	P24864	-38.7945	-38.4151
1nfi_B	experimental	NFKB1	P19838	-38.7862	-28.5926
3nhn_A	experimental	HCK	P08631	-38.7565	-32.3083
1a4i_A	experimental	MTHFD1 MTHFC MTHFD	P11586	-38.7531	-28.3777
3rpp_A	experimental	GSTK1 HDCMD47P	Q9Y2Q3	-38.7456	-30.2868
2dj0_A	experimental	TMX2 TXNDC14 CGI-31 My009 PIG26 PSEC0045 UNQ237/PRO270	Q9Y320	-38.7353	-29.544
2ku7_A	experimental	KMT2A ALL1 CXXC7 HRX HTRX MLL MLL1 TRX1	Q03164	-38.7317	-31.4709
3ojm_B	experimental	FGFR2 BEK KGFR KSAM	P21802	-38.7297	-31.453
2dh7_A	experimental	TIAL1	Q01085	-38.7251	-29.9858
3gl6_A	experimental	KDM5A JARID1A RBBP2 RBP2	P29375	-38.7251	-37.452
1x5o_A	experimental	RBMS1 C2orf12 MSSP MSSP1 SCR2	P29558	-38.7233	-40.8518
1dt9_A	experimental	ETF1 ERF1 RF1 SUP45L1	P62495	-38.7211	-32.0606
3o0g_D	experimental	CDK5R1 CDK5R NCK5A	Q15078	-38.717	-34.5438
3m66_A	experimental	MTERF3 MTERFD1 CGI-12	Q96E29	-38.7143	-37.6109
2ast_B	experimental	SKP2 FBXL1	Q13309	-38.7128	-27.6567
2bp3_A	experimental	FLNA FLN FLN1	P21333	-38.7118	-27.505
1uew_A	experimental	MAGI2 ACVRINP1 AIP1 KIAA0705	Q86UL8	-38.7099	-31.8454
3a1f_A	experimental	CYBB NOX2	P04839	-38.7074	-31.7257
3ob9_A	experimental	NA	A6NHW8	-38.7032	-33.6324
2r4b_A	experimental	ERBB4 HER4	Q15303	-38.7023	-31.9869
1yb1_A	experimental	HSD17B11 DHRS8 PAN1B SDR16C2 PSEC0029 UNQ207/PRO233	Q8NBQ5	-38.7012	-34.3902
3bd9_A	experimental	HS3ST5 3OST5 HS3OST5	Q8IZT8	-38.7011	-31.6964
1ldj_A	experimental	CUL1	Q13616	-38.7	-33.9052
2e5n_A	experimental	ELL2	O00472	-38.6967	-29.8558
3my0_A	experimental	ACVRL1 ACVRLK1 ALK1	P37023	-38.6962	-34.4875
2cv5_C	experimental	HIST1H2AB H2AFM; HIST1H2AE H2AFA	P04908	-38.693	-25.613
2ebv_A	experimental	NUP153	P49790	-38.6882	-28.5376
2q8r_E	experimental	CCL14 NCC2 SCYA14	Q16627	-38.68	-32.3075
2e6j_A	experimental	HYDIN HYDIN1 KIAA1864	Q4G0P3	-38.6792	-28.3764
1uhc_A	experimental	DNMBP KIAA1010	Q6XZF7	-38.675	-32.8361
1wi5_A	experimental	PDCD11 KIAA0185	Q14690	-38.6578	-29.2454
2w4o_A	experimental	CAMK4 CAMK CAMK-GR CAMKIV	Q16566	-38.6519	-36.852
1egi_A	experimental	MRC1 CLEC13D CLEC13DL MRC1L1	P22897	-38.6519	-32.5567
2vx2_A	experimental	ECHDC3 PP1494 PP8332	Q96DC8	-38.6448	-27.7468
3e50_B	experimental	IDE	P14735	-38.6424	-32.8041
3loh_E	experimental	INSR	P06213	-38.6416	-32.4383
1jj7_A	experimental	TAP1 ABCB2 PSF1 RING4 Y3	Q03518	-38.6375	-26.1741
1k0m_A	experimental	CLIC1 G6 NCC27	O00299	-38.6312	-26.3463
2izv_A	experimental	SOCS4 SOCS7	Q8WXH5	-38.6312	-25.6201
2fi2_A	experimental	MZF1 MZF ZNF42 ZSCAN6	P28698	-38.6307	-26.7182
2kw1_A	experimental	FAIM FAIM1	Q9NVQ4	-38.6273	-27.2988
2ecd_A	experimental	ABL2 ABLL ARG	P42684	-38.6236	-29.4607
3hi9_A	experimental	ELAVL1 HUR	Q15717	-38.6183	-31.4748
2yuk_A	experimental	KMT2C HALR KIAA1506 MLL3	Q8NEZ4	-38.616	-33.3513
2hcc_A	experimental	CCL15 MIP5 NCC3 SCYA15	Q16663	-38.6144	-39.0485
2qp8_A	experimental	BACE1 BACE KIAA1149	P56817	-38.6136	-30.4794
2ytw_A	experimental	HTRA1 HTRA PRSS11	Q92743	-38.6047	-36.1538
3d6m_B	experimental	CASP1 IL1BC IL1BCE	P29466	-38.6014	-30.1576
1bvk_B	experimental	NA	S21681	-38.5913	-30.3843
2fn2_A	experimental	FN1 FN	P02751	-38.5865	-32.6414
1nko_A	experimental	SIGLEC7 AIRM1	Q9Y286	-38.5851	-30.4097
2xfn_A	experimental	MAOB	P27338	-38.5845	-30.2387
1x5p_A	experimental	NELFE RD RDBP	P18615	-38.5664	-29.3182
1k5d_B	experimental	RANBP1	P43487	-38.5602	-31.6198
3drx_A	experimental	KCTD5	Q9NXV2	-38.553	-30.7206
3al5_A	experimental	TYW5 C2orf60	A2RUC4	-38.5398	-15.2794
1hdm_A	experimental	HLA-DMA DMA RING6	P28067	-38.5388	-30.7187
1jid_A	experimental	SRP19	P09132	-38.5373	-31.6033
3fme_A	experimental	MAP2K6 MEK6 MKK6 PRKMK6 SKK3	P52564	-38.5324	-36.2478
2xqq_A	experimental	DYNLL2 DLC2	Q96FJ2	-38.5311	-26.1935
2di8_A	experimental	FLNB FLN1L FLN3 TABP TAP	O75369	-38.5298	-34.3774
3kfd_E	experimental	TGFBR2	P37173	-38.5298	-29.5532
3omv_A	experimental	RAF1 RAF	P04049	-38.5289	-30.868
1zza_A	experimental	SNN	O75324	-38.5235	NA
2eqs_A	experimental	DHX8 DDX8	Q14562	-38.5204	-30.3363
2hf6_A	experimental	COPZ1 COPZ CGI-120 HSPC181	P61923	-38.5141	-32.1945
2wwu_A	experimental	PHF8 KIAA1111 ZNF422	Q9UPP1	-38.5112	-33.036
1ba5_A	experimental	TERF1 PIN2 TRBF1 TRF TRF1	P54274	-38.5087	-28.0735
2ecc_A	experimental	HOMEZ KIAA1443	Q8IX15	-38.507	-28.3682
1f3u_B	experimental	GTF2F1 RAP74	P35269	-38.5021	-33.5673
2x1w_A	experimental	VEGFC	P49767	-38.5009	-28.3291
3sog_A	experimental	AMPH AMPH1	P49418	-38.5007	-30.5216
3dy0_A	experimental	SERPINA5 PCI PLANH3 PROCI	P05154	-38.4923	-28.8501
1f3u_A	experimental	GTF2F2 RAP30	P13984	-38.4898	-33.5078
2uv4_A	experimental	PRKAG1	P54619	-38.4896	-29.091
1ou5_A	experimental	TRNT1 CGI-47	Q96Q11	-38.48	-26.9803
2e0a_A	experimental	PDK4 PDHK4	Q16654	-38.4787	-32.9175
2kg4_A	experimental	GADD45A DDIT1 GADD45	P24522	-38.478	-30.5389
2pom_A	experimental	TAB1 MAP3K7IP1	Q15750	-38.4776	-22.8399
2f83_A	experimental	F11	P03951	-38.4759	-27.1917
1a81_A	experimental	SYK	P43405	-38.474	-30.8622
1mfq_C	experimental	SRP54	P61011	-38.4711	-29.5696
2jri_A	experimental	ATXN3 ATX3 MJD MJD1 SCA3	P54252	-38.4664	-28.2531
2iwg_B	experimental	TRIM21 RNF81 RO52 SSA1	P19474	-38.4615	-33.5053
3mtr_A	experimental	NCAM1 NCAM	P13591	-38.4517	-31.9127
1yrk_A	experimental	PRKCD	Q05655	-38.4483	-29.5319
1xm9_A	experimental	PKP1	Q13835	-38.44	-27.3468
3t6g_A	experimental	SH2D3C NSP3 UNQ272/PRO309/PRO34088	Q8N5H7	-38.4277	-31.5024
1hlv_A	experimental	CENPB	P07199	-38.4264	-32.1709
2b3g_A	experimental	RPA1 REPA1 RPA70	P27694	-38.4263	-33.1756
2da6_A	experimental	HNF1B TCF2	P35680	-38.4147	-26.8604
1m62_A	experimental	BAG4 SODD	O95429	-38.4048	-29.7637
2bp1_A	experimental	AKR7A2 AFAR AFAR1 AKR7	O43488	-38.4009	-32.0856
2cb8_A	experimental	DBI	P07108	-38.4003	-31.0598
2vj2_A	experimental	JAG1 JAGL1	P78504	-38.3962	-27.4118
2yu1_A	experimental	KDM2A CXXC8 FBL7 FBXL11 JHDM1A KIAA1004	Q9Y2K7	-38.3927	-35.9998
3cos_A	experimental	ADH4	P08319	-38.3719	-29.6281
2d9l_A	experimental	AGFG1 HRB RAB RIP	P52594	-38.3695	-31.2808
2w3l_A	experimental	BCL2	P10415	-38.3589	-27.6551
1wgd_A	experimental	HERPUD1 HERP KIAA0025 MIF1	Q15011	-38.3449	-35.7455
2eqn_A	experimental	NAF1	Q96HR8	-38.3374	-32.5158
2l9u_A	experimental	ERBB3 HER3	P21860	-38.3243	-41.1942
2wzo_A	experimental	TBRG1 NIAM	Q3YBR2	-38.3124	-28.6395
1hh4_B	experimental	RAC1 TC25 MIG5	P63000	-38.3107	-29.8063
1f9r_A	experimental	PF4 CXCL4 SCYB4	P02776	-38.3085	-31.2143
1ppf_E	experimental	ELANE ELA2	P08246	-38.307	-35.6124
2v4b_A	experimental	ADAMTS1 KIAA1346 METH1	Q9UHI8	-38.3015	-32.1701
3n00_A	experimental	NR1D1 EAR1 HREV THRAL	P20393	-38.2942	-34.4683
2enk_A	experimental	SLC30A9 C4orf1 HUEL	Q6PML9	-38.2936	-36.1931
1mza_A	experimental	GZMK TRYP2	P49863	-38.2896	-31.6701
2rr3_A	experimental	VAPA VAP33	Q9P0L0	-38.2756	-34.1763
1p9m_C	experimental	IL6R	P08887	-38.2652	-28.6713
2nyu_A	experimental	MRM2 FJH1 FTSJ2	Q9UI43	-38.2649	-38.3369
2zix_A	experimental	MUS81	Q96NY9	-38.2632	-36.9187
1inz_A	experimental	EPN1	Q9Y6I3	-38.2494	-35.6945
2lg1_A	experimental	AKAP13 BRX HT31 LBC	Q12802	-38.247	-37.2839
3k22_A	experimental	NR3C1 GRL	P04150	-38.2449	-33.1121
2pq5_A	experimental	DUSP13 DUSP13B TMDP	Q9UII6	-38.2405	-27.0239
1h95_A	experimental	YBX1 NSEP1 YB1	P67809	-38.2371	-32.8511
1w3b_A	experimental	OGT	O15294	-38.2334	-28.2946
2gtr_A	experimental	CDYL CDYL1	Q9Y232	-38.2311	-31.2889
1a3q_A	experimental	NFKB2 LYT10	Q00653	-38.2295	-32.9187
3dax_A	experimental	CYP7A1 CYP7	P22680	-38.2267	-24.2913
1ikf_H	experimental	NA	1IKF	-38.2251	-29.8149
2h57_A	experimental	ARL6 BBS3	Q9H0F7	-38.2245	-31.6798
1nzi_A	experimental	C1S	P09871	-38.2195	-32.7182
2db2_A	experimental	DHX30 DDX30 KIAA0890	Q7L2E3	-38.2154	-30.9243
2qtw_B	experimental	PCSK9 NARC1 PSEC0052	Q8NBP7	-38.2123	-28.1884
3hnc_A	experimental	RRM1 RR1	P23921	-38.211	-37.2472
3ehw_A	experimental	DUT	P33316	-38.2056	-25.9585
3nh6_A	experimental	ABCB6 MTABC3 PRP UMAT	Q9NP58	-38.2045	-30.3529
3llh_A	experimental	TARBP2 TRBP	Q15633	-38.1972	-24.2085
2clq_A	experimental	MAP3K5 ASK1 MAPKKK5 MEKK5	Q99683	-38.1967	-36.2793
3bkb_A	experimental	FES FPS	P07332	-38.194	-35.5958
1vtn_C	experimental	FOXA3 HNF3G TCF3G	P55318	-38.1912	-29.2911
1hbx_A	experimental	SRF	P11831	-38.1891	-37.9714
2jk2_A	experimental	TPI1 TPI	P60174	-38.1846	-30.5825
1olz_A	experimental	SEMA4D C9orf164 CD100 SEMAJ	Q92854	-38.1831	-33.5384
2y5f_A	experimental	F10	P00742	-38.1802	-35.1815
1k36_A	experimental	EREG	O14944	-38.1683	-32.6697
1v84_A	experimental	B3GAT1 GLCATP	Q9P2W7	-38.156	-39.9932
1c5c_L	experimental	NA	1C5C	-38.1515	-27.8566
3s24_A	experimental	RNGTT CAP1A	O60942	-38.1491	-33.5037
2ja4_A	experimental	CD5 LEU1	P06127	-38.1461	-27.9206
1h9d_A	experimental	RUNX1 AML1 CBFA2	Q01196	-38.145	-30.6209
2yun_A	experimental	NOSTRIN	Q8IVI9	-38.1422	-25.5316
2crl_A	experimental	CCS	O14618	-38.1401	-35.4514
1nrg_A	experimental	PNPO	Q9NVS9	-38.1261	-25.8374
1ilq_B	experimental	CXCL8 IL8	P10145	-38.1215	-33.8303
3m7p_A	experimental	FN1	B7ZLE5	-38.1108	-29.2695
3ljw_A	experimental	PBRM1 BAF180 PB1	Q86U86	-38.0939	-34.1998
1ihk_A	experimental	FGF9	P31371	-38.0895	-29.8231
3ir2_A	experimental	APOBEC3G MDS019	Q9HC16	-38.0836	NA
1ds6_B	experimental	ARHGDIB GDIA2 GDID4 RAP1GN1	P52566	-38.083	-27.8048
2vsm_B	experimental	EFNB2 EPLG5 HTKL LERK5	P52799	-38.0791	-32.9065
2wo1_A	experimental	EPHA4 HEK8 SEK TYRO1	P54764	-38.0761	-33.2321
2npl_X	experimental	CXADR CAR	P78310	-38.059	-29.408
2d7n_A	experimental	FLNC ABPL FLN2	Q14315	-38.0531	-27.0075
3oad_B	experimental	REN	P00797	-38.0511	-31.9492
3feo_A	experimental	MBTD1	Q05BQ5	-38.0426	-35.225
1mdm_A	experimental	PAX5	Q02548	-38.0419	-31.8085
2djt_A	experimental	MAGIX	Q9H6Y5	-38.0407	-30.8988
1w4m_A	experimental	PLEK P47	P08567	-38.0363	-40.4801
2ery_A	experimental	RRAS2 TC21	P62070	-38.0269	-28.2944
2dmy_A	experimental	STRBP SPNR	Q96SI9	-38.0216	-34.3679
3zy1_A	experimental	TP63 KET P63 P73H P73L TP73L	Q9H3D4	-38.0216	-33.0772
1sz7_A	experimental	TRAPPC3 BET3 CDABP0066	O43617	-38.0155	-32.6592
2d9x_A	experimental	OSBPL11 ORP11 OSBP12	Q9BXB4	-38.0151	-32.0156
2l6l_A	experimental	DNAJC24 DPH4 ZCSL3	Q6P3W2	-38.0073	-36.7335
2qg1_A	experimental	MPDZ MUPP1	O75970	-37.9968	-25.7577
3siv_B	experimental	PRPF31 PRP31	Q8WWY3	-37.9944	-39.0763
1jm7_B	experimental	BARD1	Q99728	-37.9901	-31.5799
1kfu_S	experimental	CAPNS1 CAPN4 CAPNS	P04632	-37.9854	-27.054
3h7h_B	experimental	SUPT5H SPT5 SPT5H	O00267	-37.9842	-30.0022
3op5_A	experimental	VRK1	Q99986	-37.9815	-29.9771
2zu6_A	experimental	EIF4A1 DDX2A EIF4A	P60842	-37.9734	-27.2087
2ome_A	experimental	CTBP2	P56545	-37.9673	-25.8489
3kas_A	experimental	TFRC	P02786	-37.9645	-42.3754
3hei_A	experimental	EPHA2 ECK	P29317	-37.9635	-33.1284
3l9q_A	experimental	PRIM2 PRIM2A	P49643	-37.9621	-32.0299
4a9z_A	experimental	TP63 KET P63 P73H P73L TP73L	Q9H3D4	-37.9602	-31.4365
1yrv_A	experimental	UBE2U	Q5VVX9	-37.959	-28.5094
2qz4_A	experimental	SPG7 CAR PGN	Q9UQ90	-37.9534	-31.0825
2ysv_A	experimental	ZNF473 KIAA1141 ZFP100	Q8WTR7	-37.9507	-32.428
2lbf_B	experimental	RPLP2 D11S2243E RPP2	P05387	-37.9489	-30.3937
1jmt_A	experimental	U2AF1 U2AF35 U2AFBP FP793	Q01081	-37.9456	-31.2245
2c3n_A	experimental	GSTT1	P30711	-37.9425	-40.9908
3pg6_A	experimental	DTX3L BBAP	Q8TDB6	-37.9392	-30.7028
1o7z_A	experimental	CXCL10 INP10 SCYB10	P02778	-37.9369	-31.8088
1eem_A	experimental	GSTO1 GSTTLP28	P78417	-37.9361	-32.2279
2cq1_A	experimental	PTBP2 NPTB PTB PTBLP	Q9UKA9	-37.9348	-25.7599
2grr_B	experimental	RANGAP1 KIAA1835 SD	P46060	-37.9289	-33.6083
1b9g_A	experimental	IGF1 IBP1	P05019	-37.9101	-22.6637
3k6s_A	experimental	ITGAX CD11C	P20702	-37.9097	-31.2683
2c2n_A	experimental	MCAT MT	Q8IVS2	-37.9089	-26.1444
1bi7_B	experimental	CDKN2A CDKN2 MTS1	P42771	-37.9032	-30.3861
3i8z_A	experimental	CBX4	O00257	-37.8986	-32.6231
2c7a_A	experimental	PGR NR3C3	P06401	-37.8985	-28.1235
1xw6_A	experimental	GSTM1 GST1	P09488	-37.8984	-32.9292
3d9h_A	experimental	ASB9	Q96DX5	-37.8984	-28.6166
3rk6_A	experimental	PAIP1	Q9H074	-37.8933	-35.346
3i3t_A	experimental	USP21 USP23 PP1490	Q9UK80	-37.8846	-26.8249
1wel_A	experimental	RBM12 KIAA0765 HRIHFB2091	Q9NTZ6	-37.8778	-32.6158
2jjz_A	experimental	AIF1L C9orf58 IBA2 UNQ672/PRO1306	Q9BQI0	-37.877	-31.4421
1v89_A	experimental	ARHGAP25 KIAA0053	P42331	-37.8745	-25.2196
3ba0_A	experimental	MMP12 HME	P39900	-37.8728	-27.1268
1fo1_A	experimental	NXF1 TAP	Q9UBU9	-37.8722	-31.5934
1j7d_B	experimental	UBE2N BLU	P61088	-37.8563	-33.738
3b2t_A	experimental	FGFR2 BEK KGFR KSAM	P21802	-37.8558	-31.7023
1roa_A	experimental	CST5	P28325	-37.8521	-30.9095
3b28_A	experimental	HSP90AA1 HSP90A HSPC1 HSPCA	P07900	-37.847	-27.1239
2f5j_A	experimental	MORF4L1 MRG15 FWP006 HSPC008 HSPC061 PP368	Q9UBU8	-37.8373	-29.038
2o61_A	experimental	RELA NFKB3	Q04206	-37.8329	-31.6136
3czh_A	experimental	CYP2R1	Q6VVX0	-37.8314	-32.9636
2xy1_A	experimental	NCAM2 NCAM21	O15394	-37.8078	-26.5583
2xzg_A	experimental	CLTC CLH17 CLTCL2 KIAA0034	Q00610	-37.8064	-30.169
1u3b_A	experimental	APBA1 MINT1 X11	Q02410	-37.7987	-29.9574
2elq_A	experimental	ZFAT KIAA1485 ZFAT1 ZNF406	Q9P243	-37.791	-26.0079
1opi_A	experimental	U2AF2 U2AF65	P26368	-37.7883	-33.7836
3elo_A	experimental	PLA2G1B PLA2 PLA2A PPLA2	P04054	-37.785	-23.7197
2dmi_A	experimental	TSHZ3 KIAA1474 TSH3 ZNF537	Q63HK5	-37.783	-32.5346
1zoq_C	experimental	CREBBP CBP	Q92793	-37.7799	-30.7314
2ex4_A	experimental	NTMT1 C9orf32 METTL11A NRMT NRMT1 AD-003	Q9BV86	-37.779	-30.0828
3f5o_A	experimental	ACOT13 THEM2 HT012 PNAS-27	Q9NPJ3	-37.7782	-25.1327
2dm1_A	experimental	VAV2	P52735	-37.7769	-25.1647
3d8b_A	experimental	FIGNL1	Q6PIW4	-37.7768	-31.988
2qfa_A	experimental	BIRC5 API4 IAP4	O15392	-37.7731	-26.8505
2dl0_A	experimental	SASH1 KIAA0790 PEPE1	O94885	-37.7663	-25.0829
2h6d_A	experimental	PRKAA2 AMPK AMPK2	P54646	-37.7644	-36.1571
2ytm_A	experimental	ZFP28 KIAA1431	Q8NHY6	-37.7621	-31.92
3gjo_B	experimental	MAPRE1	Q15691	-37.7614	-34.8602
1fxl_A	experimental	ELAVL4 HUD PNEM	P26378	-37.7588	-35.6964
2rfj_A	experimental	BRDT	Q58F21	-37.7536	-32.0489
3d2n_A	experimental	MBNL1 EXP KIAA0428 MBNL	Q9NR56	-37.7507	-23.6854
1br9_A	experimental	TIMP2	P16035	-37.7505	-33.8696
1jcn_A	experimental	IMPDH1 IMPD1	P20839	-37.7488	-35.5152
1zkz_A	experimental	GDF2 BMP9	Q9UK05	-37.7455	-28.2849
3ngb_H	experimental	NA	3NGB	-37.7441	-29.7799
1kt0_A	experimental	FKBP5 AIG6 FKBP51	Q13451	-37.7401	-25.4544
2dnr_A	experimental	SYNJ1 KIAA0910	O43426	-37.7392	-29.0662
2i46_A	experimental	ACD PIP1 PTOP TINT1 TPP1	Q96AP0	-37.7279	-33.8055
3p71_C	experimental	PPP2CA	P67775	-37.7277	-31.0732
3bpo_A	experimental	IL13 NC30	P35225	-37.7189	-36.4592
3maz_A	experimental	STAP1 BRDG1	Q9ULZ2	-37.7139	-25.4729
1jm7_A	experimental	BRCA1 RNF53	P38398	-37.7073	-36.0149
2ehr_A	experimental	PATJ INADL	Q8NI35	-37.7069	-31.4686
2el4_A	experimental	ZNF268	Q14587	-37.7056	-27.9063
3llu_A	experimental	RRAGC	Q9HB90	-37.699	-31.4527
2e7c_A	experimental	MYBPC2 MYBPCF	Q14324	-37.6923	-33.929
2fw2_A	experimental	CDY2A CDY2; CDY2B	Q9Y6F7	-37.6759	-28.9996
2uwn_A	experimental	CFH HF HF1 HF2	P08603	-37.6737	-23.0759
1wil_A	experimental	PHF24 KIAA1045	Q9UPV7	-37.67	-32.0091
2w5y_A	experimental	KMT2A ALL1 CXXC7 HRX HTRX MLL MLL1 TRX1	Q03164	-37.6615	-33.3481
3ovp_A	experimental	RPE HUSSY-17	Q96AT9	-37.6592	-31.1333
2e3l_A	experimental	GTF2IRD2B	Q6EKJ0	-37.6546	-33.2942
2cvd_A	experimental	HPGDS GSTS PGDS PTGDS2	O60760	-37.6496	-29.0984
3ctr_A	experimental	PARN DAN	O95453	-37.6466	-25.4973
1gri_A	experimental	GRB2 ASH	P62993	-37.644	-30.7829
2obi_A	experimental	GPX4	P36969	-37.6435	-36.5802
3es6_B	experimental	PIP GCDFP15 GPIP4	P12273	-37.6394	-32.3592
2dmm_A	experimental	PDIA3 ERP57 ERP60 GRP58	P30101	-37.6336	-27.9185
3g43_B	experimental	CALM1 CALM CAM CAM1; CALM2 CAM2 CAMB; CALM3 CALML2 CAM3 CAMC CAMIII	P62158	-37.6313	-29.1229
3qe2_A	experimental	POR CYPOR	P16435	-37.625	-41.1477
3gge_A	experimental	GIPC2	Q8TF65	-37.616	-32.588
3o4o_C	experimental	IL1R2 IL1RB	P27930	-37.6139	-35.1899
2o36_A	experimental	THOP1	P52888	-37.6127	-34.6325
2kdp_A	experimental	SAP30	O75446	-37.6108	-26.3659
2e6w_A	experimental	KCNIP3 CSEN DREAM KCHIP3	Q9Y2W7	-37.6038	-32.5726
1qa9_A	experimental	CD2 SRBC	P06729	-37.5883	-27.0158
1qo6_A	experimental	FN1 FN	P02751	-37.5882	-29.1435
2dgx_A	experimental	KIAA0430 LKAP MARF1	Q9Y4F3	-37.5858	-31.8194
1wf0_A	experimental	TARDBP TDP43	Q13148	-37.5829	-25.1675
2dmk_A	experimental	MID2 FXY2 RNF60 TRIM1	Q9UJV3	-37.5788	-30.4548
1e41_A	experimental	FADD MORT1 GIG3	Q13158	-37.5787	-32.2901
2a5d_A	experimental	ARF6	P62330	-37.5745	-30.8057
3kn6_A	experimental	RPS6KA5 MSK1	O75582	-37.5742	-33.4558
2a14_A	experimental	INMT	O95050	-37.5383	-24.5765
2x11_B	experimental	EFNA5 EPLG7 LERK7	P52803	-37.5323	-32.2972
2ewy_A	experimental	BACE2 AEPLC ALP56 ASP21 CDA13 UNQ418/PRO852	Q9Y5Z0	-37.5289	-34.2514
1uea_B	experimental	TIMP1 CLGI TIMP	P01033	-37.5288	-29.8537
1f6o_A	experimental	MPG AAG ANPG MID1	P29372	-37.5243	-31.4625
2p26_A	experimental	ITGB2 CD18 MFI7	P05107	-37.5183	-27.3243
3enb_A	experimental	PRPF8 PRPC8	Q6P2Q9	-37.5176	-37.9433
2nut_A	experimental	SEC23A	Q15436	-37.517	-30.5611
3po1_B	experimental	F2	P00734	-37.511	-28.8554
3zvz_B	experimental	UHRF1 ICBP90 NP95 RNF106	Q96T88	-37.5096	-24.7944
2w96_B	experimental	CDK4	P11802	-37.5079	-31.9212
1p1t_A	experimental	CSTF2	P33240	-37.5071	-35.9039
2keo_A	experimental	HERC2	O95714	-37.5018	-23.2473
3gov_A	experimental	MASP1 CRARF CRARF1 PRSS5	P48740	-37.4995	-30.6205
1na8_A	experimental	GGA1	Q9UJY5	-37.4923	-30.7615
3luc_A	experimental	AGO2 EIF2C2	Q9UKV8	-37.4907	-24.6317
2jrf_A	experimental	TPPP3 CGI-38	Q9BW30	-37.4885	-29.4172
4a0a_A	experimental	DDB1 XAP1	Q16531	-37.4779	-35.2323
3nwv_A	experimental	CYCS CYC	P99999	-37.4771	-30.944
1tgr_A	experimental	IGF1 IBP1	P05019	-37.4718	-19.8838
2ecn_A	experimental	RNF141 ZNF230	Q8WVD5	-37.4683	-23.8565
1quu_A	experimental	ACTN2	P35609	-37.4658	-25.5646
3ghg_C	experimental	FGG PRO2061	P02679	-37.4629	-30.8993
3zur_A	experimental	NA	3ZUR	-37.4628	-32.4013
2yt7_A	experimental	APBA3 MINT3 X11L2	O96018	-37.459	-24.9321
2ee6_A	experimental	FLNB FLN1L FLN3 TABP TAP	O75369	-37.4563	-31.7619
3au4_A	experimental	MYO10 KIAA0799	Q9HD67	-37.4541	-31.3243
2o9s_A	experimental	SORBS1 KIAA0894 KIAA1296 SH3D5	Q9BX66	-37.4485	-27.9894
2eyx_A	experimental	CRK	P46108	-37.4476	-32.0309
3u1s_H	experimental	NA	3U1S	-37.4474	-29.0015
1nrv_A	experimental	GRB10 GRBIR KIAA0207	Q13322	-37.4343	-25.8714
1ev2_B	experimental	FGF2 FGFB	P09038	-37.4309	-27.5668
2vfa_A	experimental	NA	P20035	-37.4297	-28.9793
2hzd_A	experimental	TEAD1 TCF13 TEF1	P28347	-37.4266	-24.3141
1ugn_A	experimental	LILRB1 ILT2 LIR1 MIR7	Q8NHL6	-37.425	-25.6727
2ozf_A	experimental	SLC9A3R1 NHERF NHERF1	O14745	-37.4241	-30.4718
2esl_A	experimental	PPIC CYPC	P45877	-37.422	-33.3593
2dnm_A	experimental	SRSF8 SFRS2B SRP46	Q9BRL6	-37.4208	-27.5987
3lru_A	experimental	PRPF8 PRPC8	Q6P2Q9	-37.4198	-36.2235
3cjj_A	experimental	AGER RAGE	Q15109	-37.4151	-27.1489
2ib8_A	experimental	ACAT1 ACAT MAT	P24752	-37.4115	-30.5433
2oqp_A	experimental	IL21	Q9HBE4	-37.4088	-29.0894
2do6_A	experimental	CBLB RNF56 Nbla00127	Q13191	-37.4065	-31.1736
2dir_A	experimental	THUMPD1	Q9NXG2	-37.4038	-30.1442
3l2p_A	experimental	LIG3	P49916	-37.4015	-32.487
2qy0_A	experimental	C1R	P00736	-37.4013	-29.9262
2jdq_A	experimental	KPNA1 RCH2	P52294	-37.4004	-31.1157
2ede_A	experimental	DCC IGDCC1	P43146	-37.3969	-29.0213
3fed_A	experimental	NAALAD2	Q9Y3Q0	-37.3925	-39.3824
1fj2_A	experimental	LYPLA1 APT1 LPL1	O75608	-37.3913	-29.8554
2jak_A	experimental	PPP2R5C KIAA0044	Q13362	-37.391	-31.0827
2d96_A	experimental	NFKB2 LYT10	Q00653	-37.3905	-30.9371
2cs0_A	experimental	HSH2D ALX	Q96JZ2	-37.3895	-29.1243
2auh_B	experimental	GRB14	Q14449	-37.3889	-25.0117
3jwr_B	experimental	PDE5A PDE5	O76074	-37.388	-31.7336
2i9a_A	experimental	PLAU	P00749	-37.3792	-32.3909
2dh9_A	experimental	HNRNPM HNRPM NAGR1	P52272	-37.3683	-30.7204
2oct_A	experimental	CSTB CST6 STFB	P04080	-37.3641	-25.9394
2jjs_B	experimental	SIRPA BIT MFR MYD1 PTPNS1 SHPS1 SIRP	P78324	-37.3597	-31.2747
2cr4_A	experimental	SH3BP2 3BP2 RES4-23	P78314	-37.3543	-27.5826
1rxt_A	experimental	NMT1 NMT	P30419	-37.354	-32.4114
3n3f_A	experimental	COL15A1	P39059	-37.3513	-37.6148
1m1e_B	experimental	CTNNBIP1 ICAT	Q9NSA3	-37.3462	-30.9272
2js2_A	experimental	NCK1 NCK	P16333	-37.346	-30.1915
1l9n_A	experimental	TGM3	Q08188	-37.3437	-27.8793
2dls_A	experimental	ARHGEF11 KIAA0380	O15085	-37.3424	-32.4
6pax_A	experimental	PAX6 AN2	P26367	-37.3301	-29.7624
2yuu_A	experimental	PRKCD	Q05655	-37.3213	-28.7564
2bfd_B	experimental	BCKDHB	P21953	-37.3166	-25.8091
3iwp_A	experimental	CUTC CGI-32	Q9NTM9	-37.3163	-28.4872
2c43_A	experimental	AASDHPPT CGI-80 HAH-P HSPC223 x0005	Q9NRN7	-37.3146	-14.7076
2uzg_A	experimental	USP33 KIAA1097 VDU1	Q8TEY7	-37.3136	-30.6349
3mdm_A	experimental	CYP46A1 CYP46	Q9Y6A2	-37.3035	-33.431
2kdg_A	experimental	MYOT TTID	Q9UBF9	-37.2981	-29.6268
1gqv_A	experimental	RNASE2 EDN RNS2	P10153	-37.2939	-31.2617
2c0y_A	experimental	CTSS	P25774	-37.2907	-28.0311
2grr_A	experimental	UBE2I UBC9 UBCE9	P63279	-37.2907	-30.7397
3b6u_A	experimental	KIF3B KIAA0359	O15066	-37.2845	-35.1207
2p4k_A	experimental	SOD2	P04179	-37.2841	-31.9106
2j32_A	experimental	CASP3 CPP32	P42574	-37.2751	-32.6379
2div_A	experimental	TRNAU1AP SECP43 TRSPAP1	Q9NX07	-37.2748	-30.1772
2ovr_A	experimental	SKP1 EMC19 OCP2 SKP1A TCEB1L	P63208	-37.273	-28.9772
3dwb_A	experimental	ECE1	P42892	-37.2729	-33.6324
2wph_S	experimental	F9	P00740	-37.2707	-40.095
1oth_A	experimental	OTC	P00480	-37.2612	-26.5784
2c46_A	experimental	RNGTT CAP1A	O60942	-37.2593	-23.41
1h0z_A	experimental	SPINK5	Q9NQ38	-37.2558	-25.3911
2k7w_A	experimental	BAX BCL2L4	Q07812	-37.2522	-28.8883
3c6w_A	experimental	ING5	Q8WYH8	-37.2513	-30.2466
1lb6_A	experimental	TRAF6 RNF85	Q9Y4K3	-37.2458	-31.4537
1x52_A	experimental	PELO CGI-17	Q9BRX2	-37.2404	-24.5891
1z1m_A	experimental	MDM2	Q00987	-37.2397	-30.3842
2ykt_A	experimental	BAIAP2	Q9UQB8	-37.2309	-34.2292
1fzv_A	experimental	PGF PGFL PLGF	P49763	-37.2305	-30.1193
1k5n_A	experimental	HLA-B HLAB	P03989	-37.227	-29.7089
2vsz_A	experimental	ELMO1 KIAA0281	Q92556	-37.2255	-30.9732
1oqj_A	experimental	GMEB1	Q9Y692	-37.2206	-28.3145
2d8k_A	experimental	SYT7 PCANAP7	O43581	-37.2198	-32.0337
2kjd_A	experimental	SLC9A3R1 NHERF NHERF1	O14745	-37.2169	-27.3766
1hjx_A	experimental	CHI3L1	P36222	-37.2165	-32.9267
2y1w_A	experimental	CARM1 PRMT4	Q86X55	-37.2159	-32.6091
2pmv_A	experimental	GIF IFMH	P27352	-37.2155	-35.2631
2aze_B	experimental	E2F1 RBBP3	Q01094	-37.2119	-27.5869
1qfw_B	experimental	NA	P01233	-37.2108	-28.2197
3uyo_D	experimental	NA	3UYO	-37.2103	-29.4326
1t7v_A	experimental	AZGP1 ZAG ZNGP1	P25311	-37.2102	-32.2381
2ozo_A	experimental	ZAP70 SRK	P43403	-37.2073	-33.6863
2qcq_A	experimental	BMP3 BMP3A	P12645	-37.1987	-33.3756
2buj_A	experimental	STK16 MPSK1 PKL12 TSF1	O75716	-37.1986	-29.6023
1li4_A	experimental	AHCY SAHH	P23526	-37.1953	-35.9685
2o23_A	experimental	HSD17B10 ERAB HADH2 MRPP2 SCHAD SDR5C1 XH98G2	Q99714	-37.1953	-27.683
1ihb_A	experimental	CDKN2C CDKN6	P42773	-37.1921	-37.0437
2gi7_A	experimental	GP6	Q9HCN6	-37.1875	-30.8824
1uw4_B	experimental	UPF2 KIAA1408 RENT2	Q9HAU5	-37.1751	-34.3784
2vm5_A	experimental	NAIP BIRC1	Q13075	-37.1678	-30.0053
2e9k_A	experimental	MICAL2 KIAA0750 MICAL2PV1 MICAL2PV2	O94851	-37.1647	-27.0298
1itb_B	experimental	IL1R1 IL1R IL1RA IL1RT1	P14778	-37.1602	-33.6327
2hz6_A	experimental	ERN1 IRE1	O75460	-37.1571	-33.8599
2nt2_A	experimental	SSH2 KIAA1725 SSH2L	Q76I76	-37.1571	-32.3539
1zua_X	experimental	AKR1B10 AKR1B11	O60218	-37.1558	-30.5983
1miu_B	experimental	SHFM1 DSS1 SHFDG1	P60896	-37.1544	-32.2637
2dk1_A	experimental	WBP4 FBP21 FNBP21	O75554	-37.1502	-25.2308
2o5x_H	experimental	IGHG1	P01857	-37.1493	-31.9122
2cpr_A	experimental	EXOSC10 PMSCL PMSCL2 RRP6	Q01780	-37.1423	-27.4533
2kn4_A	experimental	NA	P19909	-37.1417	-28.3298
2en9_A	experimental	ZFP28 KIAA1431	Q8NHY6	-37.1392	-30.9631
2dn9_A	experimental	DNAJA3 HCA57 TID1	Q96EY1	-37.1368	-32.455
2ema_A	experimental	ZNF347 ZNF1111	Q96SE7	-37.1342	-31.3876
2hth_B	experimental	VPS36 C13orf9 EAP45 CGI-145	Q86VN1	-37.1339	-28.7256
2i5f_A	experimental	PLEK P47	P08567	-37.132	-31.2876
1dgn_A	experimental	CARD18 ICEBERG UNQ5804/PRO19611	P57730	-37.1275	-28.311
1ich_A	experimental	TNFRSF1A TNFAR TNFR1	P19438	-37.125	-29.7804
2ke4_A	experimental	TRIP10 CIP4 STOT STP	Q15642	-37.1234	-28.1233
2f1z_A	experimental	USP7 HAUSP	Q93009	-37.1212	-26.9406
1zuo_A	experimental	UBE2Q2	Q8WVN8	-37.1128	-31.4072
2j7t_A	experimental	STK10 LOK	O94804	-37.1112	-32.4925
1ka6_A	experimental	SH2D1A DSHP SAP	O60880	-37.111	-33.2115
3an0_A	experimental	MAP2K6 MEK6 MKK6 PRKMK6 SKK3	P52564	-37.1094	-29.3553
2x6v_A	experimental	TBX5	Q99593	-37.1061	-31.4046
1wxt_A	experimental	EPS8L3 EPS8R3	Q8TE67	-37.1057	-31.3915
1wyo_A	experimental	MAPRE3	Q9UPY8	-37.104	-21.1831
1wm3_A	experimental	SUMO2 SMT3B SMT3H2	P61956	-37.0932	-28.8409
3pl6_C	experimental	NA	3PL6	-37.0877	-27.5083
3lre_A	experimental	KIF18A OK/SW-cl.108	Q8NI77	-37.0867	-36.3927
1ek6_A	experimental	GALE	Q14376	-37.0771	-48.5013
2l3d_A	experimental	KDM1A AOF2 KDM1 KIAA0601 LSD1	O60341	-37.0771	-32.9504
1k4u_S	experimental	NCF2 NOXA2 P67PHOX	P19878	-37.0573	-31.1947
2r37_A	experimental	GPX3 GPXP	P22352	-37.0506	-30.1655
3dm1_A	experimental	CBX3	Q13185	-37.049	-28.3621
2rgz_A	experimental	HMOX2 HO2	P30519	-37.0478	-26.3419
3rze_A	experimental	HRH1	P35367	-37.0431	-40.585
1un3_A	experimental	ANG RNASE5	P03950	-37.0418	-29.3574
2i96_A	experimental	CYB5A CYB5	P00167	-37.0416	-29.4376
2bt2_A	experimental	RGS16 RGSR	O15492	-37.0402	-33.3403
1ko6_A	experimental	NUP98 ADAR2	P52948	-37.037	-33.1405
2dun_A	experimental	POLM polmu	Q9NP87	-37.0298	-32.0871
3bgv_A	experimental	RNMT KIAA0398	O43148	-37.0293	-27.7829
3cok_A	experimental	PLK4 SAK STK18	O00444	-37.0282	-27.3934
2k8g_A	experimental	PABPC1 PAB1 PABP1 PABPC2	P11940	-37.0192	-28.016
2pnr_A	experimental	PDK3 PDHK3	Q15120	-37.014	-26.7426
1pcf_A	experimental	SUB1 PC4 RPO2TC1	P53999	-37.0118	-32.6028
2obd_A	experimental	CETP	P11597	-37.009	-32.5151
2eol_A	experimental	ZNF268	Q14587	-37.0064	-23.8287
2y43_A	experimental	RAD18 RNF73	Q9NS91	-37.0046	-27.9179
1jdw_A	experimental	GATM AGAT	P50440	-37.0035	-29.824
2dzi_A	experimental	UBL4A DXS254E GDX UBL4	P11441	-37.0016	-30.718
2yd8_A	experimental	PTPRF LAR	P10586	-37.0007	-34.5175
2j67_A	experimental	TLR10 UNQ315/PRO358	Q9BXR5	-36.9996	-26.1502
3cb2_A	experimental	TUBG1 TUBG	P23258	-36.989	-25.8645
2y4q_A	experimental	PKD2 TRPP2	Q13563	-36.9888	-33.854
1w4r_A	experimental	TK1	P04183	-36.9857	-24.6067
1n1j_A	experimental	NFYB HAP3	P25208	-36.9826	-28.2027
3pua_A	experimental	PHF2 CENP-35 KIAA0662	O75151	-36.9823	-25.2735
2v3q_A	experimental	NA	P85173	-36.9805	-28.2951
2fdv_A	experimental	CYP2A6 CYP2A3	P11509	-36.9797	NA
2rnr_B	experimental	GTF2H1 BTF2	P32780	-36.9791	-30.5705
2da4_A	experimental	HDX CXorf43	Q7Z353	-36.9721	-32.165
2rh1_A	experimental	ADRB2 ADRB2R B2AR	P07550	-36.9683	-34.68
2wgh_A	experimental	RRM1 RR1	P23921	-36.9648	-29.774
2xt3_A	experimental	KIF7 UNQ340/PRO539	Q2M1P5	-36.9633	-29.7047
2fu5_A	experimental	RABIF MSS4 RASGRF3	P47224	-36.9614	-31.8788
2f8a_A	experimental	GPX1	P07203	-36.9611	-25.682
1h2i_A	experimental	RAD52	P43351	-36.9558	-34.1441
2q3g_A	experimental	PDLIM7 ENIGMA	Q9NR12	-36.9549	-24.9403
2kfv_A	experimental	FKBP3 FKBP25	Q00688	-36.9507	-25.3448
1n83_A	experimental	RORA NR1F1 RZRA	P35398	-36.9472	-30.8296
2doa_A	experimental	ELL C19orf17	P55199	-36.9443	-23.9354
1s9c_A	experimental	HSD17B4 EDH17B4 SDR8C1	P51659	-36.944	-31.6546
1gkg_A	experimental	CR1 C3BR	P17927	-36.9428	-31.2975
2ra3_A	experimental	PRSS1 TRP1 TRY1 TRYP1	P07477	-36.9236	-27.774
2pid_A	experimental	YARS2 CGI-04	Q9Y2Z4	-36.9209	-30.2698
1wfq_A	experimental	CSDE1 D1S155E KIAA0885 NRU UNR	O75534	-36.9186	-32.8559
2jil_A	experimental	GRIP1	Q9Y3R0	-36.9186	-27.5871
1x65_A	experimental	CSDE1 D1S155E KIAA0885 NRU UNR	O75534	-36.9168	-27.3052
2bec_A	experimental	CHP2 HCA520	O43745	-36.9132	-35.895
2o10_A	experimental	CSRP3 CLP MLP	P50461	-36.9111	-26.611
2yuw_A	experimental	MYBPC1 MYBPCS	Q00872	-36.91	-30.888
2jxj_A	experimental	KDM5A JARID1A RBBP2 RBP2	P29375	-36.9083	-32.9552
3bx7_A	experimental	CTLA4 CD152	P16410	-36.9039	-28.1109
2eci_A	experimental	TRAF6 RNF85	Q9Y4K3	-36.9032	-33.0926
1l1o_C	experimental	RPA1 REPA1 RPA70	P27694	-36.9004	-27.1299
2ed7_A	experimental	DCC IGDCC1	P43146	-36.8981	-26.2755
3h0t_B	experimental	NA	3H0T	-36.897	-28.5345
3tg4_A	experimental	SMYD2 KMT3C	Q9NRG4	-36.8969	-37.2006
3fcs_B	experimental	ITGB3 GP3A	P05106	-36.8946	-28.7133
3rug_D	experimental	NA	Q91XJ8	-36.8919	-31.215
1imv_A	experimental	SERPINF1 PEDF PIG35	P36955	-36.8917	-31.7821
1wie_A	experimental	RIMBP2 KIAA0318 RBP2	O15034	-36.8914	-28.0183
2vx8_A	experimental	NA	2VX8	-36.8872	-27.8748
2yw8_A	experimental	RUFY1 RABIP4 ZFYVE12	Q96T51	-36.8846	-28.8681
2jgw_A	experimental	CFH HF HF1 HF2	P08603	-36.8811	-34.3027
2qkh_A	experimental	GIPR	P48546	-36.8778	-29.077
2jr7_A	experimental	DPH3 DESR1 ZCSL2	Q96FX2	-36.8734	-24.2767
1ete_A	experimental	FLT3LG	P49771	-36.8706	-31.2142
1i7k_A	experimental	UBE2C UBCH10	O00762	-36.8696	-29.153
1h6i_A	experimental	AQP1 CHIP28	P29972	-36.869	-27.5736
2cb5_A	experimental	BLMH	Q13867	-36.8596	-20.8844
2ovr_B	experimental	FBXW7 FBW7 FBX30 SEL10	Q969H0	-36.8512	-31.67
2e30_A	experimental	CHP1 CHP	Q99653	-36.8504	-32.5117
2nzi_A	experimental	TTN	Q8WZ42	-36.8455	-31.9595
1hzh_H	experimental	NA	185362	-36.8431	-35.7892
3h1p_B	experimental	CASP7 MCH3	P55210	-36.8404	-29.8833
3dsz_A	experimental	LCN2 HNL NGAL	P80188	-36.8397	-31.0732
2lgw_A	experimental	DNAJB2 HSJ1 HSPF3	P25686	-36.8332	-27.4358
2emj_A	experimental	ZFP28 KIAA1431	Q8NHY6	-36.8311	-29.8039
2d8z_A	experimental	FHL2 DRAL SLIM3	Q14192	-36.8267	-25.8861
2wz1_A	experimental	GUCY1B3 GUC1B3 GUCSB3 GUCY1B1	Q02153	-36.8262	-28.409
2db9_A	experimental	RTF1 KIAA0252	Q92541	-36.8249	-20.599
2jgn_A	experimental	DDX3X DBX DDX3	O00571	-36.8184	-33.0627
3kb5_A	experimental	TRIM72 MG53	Q6ZMU5	-36.8171	-33.6013
1qb0_A	experimental	CDC25B CDC25HU2	P30305	-36.8153	NA
1uj2_A	experimental	UCK2 UMPK	Q9BZX2	-36.8126	-31.8963
3ihp_A	experimental	USP5 ISOT	P45974	-36.8112	-37.1144
3hrz_D	experimental	CFB BF BFD	P00751	-36.81	-30.8004
2byg_A	experimental	DLG2	Q15700	-36.7988	-32.1444
1jl0_A	experimental	AMD1 AMD	P17707	-36.7892	-29.0072
1yz4_A	experimental	DUSP15 C20orf57 VHY	Q9H1R2	-36.7886	-37.5221
2r5t_A	experimental	SGK1 SGK	O00141	-36.7863	-31.1273
2ake_A	experimental	WARS IFI53 WRS	P23381	-36.7855	-28.3425
2e9x_B	experimental	GINS2 PSF2 CGI-122 DC5 HSPC037	Q9Y248	-36.7803	-35.0591
2oq5_A	experimental	TMPRSS11E DESC1 TMPRSS11E2 UNQ742/PRO1461	Q9UL52	-36.7753	-28.9294
2lmd_A	experimental	PROX1	Q92786	-36.7668	-28.4281
1x5e_A	experimental	TMX1 TMX TXNDC TXNDC1 PSEC0085 UNQ235/PRO268	Q9H3N1	-36.7664	-31.9939
3nyl_A	experimental	APP A4 AD1	P05067	-36.7657	-25.7638
2kwi_A	experimental	RALB	P11234	-36.7621	-31.5061
3rw6_A	experimental	NXF1 TAP	Q9UBU9	-36.7554	NA
3oad_A	experimental	REN	P00797	-36.7539	-28.3429
2eo9_A	experimental	ROBO1 DUTT1	Q9Y6N7	-36.752	-28.259
1lm8_C	experimental	TCEB1	Q15369	-36.7448	-30.5989
2p5x_A	experimental	ASMTL	O95671	-36.7408	-33.0594
3nbz_C	experimental	RAN ARA24 OK/SW-cl.81	P62826	-36.7354	-30.8038
3o47_A	experimental	ARFGAP1 ARF1GAP	Q8N6T3	-36.7258	-20.6455
2ldy_A	experimental	NA	Q15605	-36.7236	-33.3888
1mq4_A	experimental	AURKA AIK AIRK1 ARK1 AURA AYK1 BTAK IAK1 STK15 STK6	O14965	-36.7132	-37.2014
2ers_A	experimental	IL15RA	Q13261	-36.7114	-26.4867
1apj_A	experimental	FBN1 FBN	P35555	-36.7102	-31.6424
3dh1_A	experimental	ADAT2 DEADC1	Q7Z6V5	-36.7034	-27.7923
1adz_A	experimental	TFPI LACI TFPI1	P10646	-36.7025	-23.7412
2fzp_A	experimental	RNF41 FLRF NRDP1 SBBI03	Q9H4P4	-36.6935	-22.1137
1aap_A	experimental	APP A4 AD1	P05067	-36.69	-29.9259
2v40_A	experimental	ADSS ADSS2	P30520	-36.6858	-31.4509
2oyh_A	experimental	FGA	P02671	-36.6833	-23.2296
2dn6_A	experimental	SWAP70 KIAA0640 HSPC321	Q9UH65	-36.6779	-25.9793
2dzj_A	experimental	TECR GPSN2 SC2	Q9NZ01	-36.6726	-32.2813
2kmu_A	experimental	RECQL4 RECQ4	O94761	-36.6676	-30.5093
2o13_A	experimental	CSRP3 CLP MLP	P50461	-36.6626	-30.9116
3ew0_A	experimental	CISD1 C10orf70 ZCD1 MDS029	Q9NZ45	-36.6618	-23.2666
2cp6_A	experimental	CLIP1 CYLN1 RSN	P30622	-36.661	-28.1203
2ebl_A	experimental	NR2F1 EAR3 ERBAL3 TFCOUP1	P10589	-36.6593	-30.7806
2jgb_A	experimental	EIF4E2 EIF4EL3	O60573	-36.6565	-31.2472
2dlu_A	experimental	PATJ INADL	Q8NI35	-36.6549	-35.2432
2eki_A	experimental	DRG1 NEDD3	Q9Y295	-36.653	-30.9816
2iw2_A	experimental	PEPD PRD	P12955	-36.6513	-37.1435
1p22_A	experimental	BTRC BTRCP FBW1A FBXW1A	Q9Y297	-36.6502	-28.2882
2d9j_A	experimental	RGS7	P49802	-36.6393	-28.8408
1ldk_A	experimental	CUL1	Q13616	-36.6386	-29.4168
2o93_L	experimental	NFATC2 NFAT1 NFATP	Q13469	-36.6351	-31.5773
1m8o_B	experimental	ITGB3 GP3A	P05106	-36.6329	-30.168
2dis_A	experimental	RBM47	A0AV96	-36.6319	-25.7216
1so2_A	experimental	PDE3B	Q13370	-36.6298	-33.903
2dbd_A	experimental	NOD1 CARD4	Q9Y239	-36.6294	NA
2x7c_A	experimental	KIF11 EG5 KNSL1 TRIP5	P52732	-36.6272	-28.2466
3zwf_A	experimental	ELAC1 D29	Q9H777	-36.6265	-24.8226
2gl6_A	experimental	CKMT2	P17540	-36.6245	-32.2203
2ylm_A	experimental	USP7 HAUSP	Q93009	-36.6228	-29.5979
2ytd_A	experimental	ZNF473 KIAA1141 ZFP100	Q8WTR7	-36.6217	-25.6671
1p4o_A	experimental	IGF1R	P08069	-36.6199	-40.5463
1ext_A	experimental	TNFRSF1A TNFAR TNFR1	P19438	-36.6198	-31.6762
2e9x_C	experimental	GINS3 PSF3	Q9BRX5	-36.6195	-29.1116
1nun_A	experimental	FGF10	O15520	-36.6159	-29.0841
1owx_A	experimental	SSB	P05455	-36.6129	-30.4981
1fuj_A	experimental	PRTN3 MBN	P24158	-36.6088	-33.2545
1x5u_A	experimental	SF3B4 SAP49	Q15427	-36.6086	-29.1726
1ijb_A	experimental	VWF F8VWF	P04275	-36.6015	-32.2188
1o9k_C	experimental	RB1	P06400	-36.6005	-28.9022
2e9x_D	experimental	GINS4 SLD5	Q9BRT9	-36.599	-27.9095
2e8o_A	experimental	SAMHD1 MOP5	Q9Y3Z3	-36.5956	-26.3255
2fc8_A	experimental	NCL	P19338	-36.5951	-30.1319
2hk5_A	experimental	HCK	P08631	-36.5896	-27.7081
2kg5_A	experimental	ARAP3 CENTD3	Q8WWN8	-36.583	-28.4645
3sza_A	experimental	ALDH3A1 ALDH3	P30838	-36.58	-24.7213
2diq_A	experimental	TDRKH TDRD2	Q9Y2W6	-36.5767	-32.4633
2j0s_T	experimental	CASC3 MLN51	O15234	-36.5731	-30.718
1b8m_B	experimental	NA	M86528	-36.5696	-32.0067
1evs_A	experimental	OSM	P13725	-36.5682	-24.2125
1htn_A	experimental	CLEC3B TNA	P05452	-36.5669	-29.7134
3lpp_A	experimental	SI	P14410	-36.5637	NA
1p5z_B	experimental	DCK	P27707	-36.5617	-34.5371
3p23_A	experimental	ERN1 IRE1	O75460	-36.5603	-34.0735
1rgw_A	experimental	LDB3 KIAA0613 ZASP	O75112	-36.5602	-27.5652
1h2k_A	experimental	HIF1AN FIH1	Q9NWT6	-36.5543	-32.0337
1flk_A	experimental	TRAF3 CAP1 CRAF1	Q13114	-36.5533	-18.7153
2y7b_A	experimental	ANLN	Q9NQW6	-36.5511	-29.6759
2o28_A	experimental	GNPNAT1 GNA1	Q96EK6	-36.5461	-29.2795
3d2u_E	experimental	NA	P08560	-36.545	-26.1694
3sgj_B	experimental	IGHG1	P01857	-36.5447	-30.0062
1hh8_A	experimental	NCF2 NOXA2 P67PHOX	P19878	-36.5436	-32.5369
2wm3_A	experimental	NMRAL1 HSCARG	Q9HBL8	-36.5386	-35.1104
3plz_A	experimental	NR5A2 B1F CPF FTF	O00482	-36.5282	-29.5364
1h03_P	experimental	CD55 CR DAF	P08174	-36.516	-30.1006
2fry_A	experimental	NCK2 GRB4	O43639	-36.5138	-34.1608
2dm8_A	experimental	PATJ INADL	Q8NI35	-36.5078	-28.7606
2jp1_A	experimental	XCL1 LTN SCYC1	P47992	-36.5074	-27.6328
2enq_A	experimental	PIK3CA	P42336	-36.5015	-21.776
2e7a_A	experimental	TNF TNFA TNFSF2	P01375	-36.5006	-32.691
2ctj_A	experimental	HDLBP HBP VGL	Q00341	-36.4984	-33.4889
1l9x_A	experimental	GGH	Q92820	-36.4947	NA
1rw2_A	experimental	XRCC5 G22P2	P13010	-36.4929	-32.4698
2w2n_E	experimental	LDLR	P01130	-36.4927	-28.4887
3dkp_A	experimental	DDX52 ROK1 HUSSY-19	Q9Y2R4	-36.4912	-28.7768
2e9j_A	experimental	FLNB FLN1L FLN3 TABP TAP	O75369	-36.4832	-30.6479
2jii_A	experimental	VRK3	Q8IV63	-36.4821	-31.642
1y2k_A	experimental	PDE4D DPDE3	Q08499	-36.4819	-29.0416
3lgd_A	experimental	CECR1 ADA2 ADGF IDGFL	Q9NZK5	-36.4757	-37.6586
3h0h_A	experimental	FYN	P06241	-36.4748	-30.0876
2y7j_A	experimental	PHKG2	P15735	-36.4728	-33.7159
2hc1_A	experimental	PTPRB PTPB	P23467	-36.4725	-29.8559
3e7o_A	experimental	MAPK9 JNK2 PRKM9 SAPK1A	P45984	-36.4717	-33.0858
3p0u_A	experimental	NR2C2 TAK1 TR4	P49116	-36.4708	-30.0928
3l7u_A	experimental	NME1 NDPKA NM23	P15531	-36.4696	-25.1163
2ag4_A	experimental	GM2A	P17900	-36.4653	-25.1964
3eay_A	experimental	SENP7 KIAA1707 SSP2 SUSP2	Q9BQF6	-36.4641	-25.0491
3exe_A	experimental	PDHA1 PHE1A	P08559	-36.4604	-23.5177
3knv_A	experimental	TRAF2 TRAP3	Q12933	-36.4452	-28.1413
3huj_A	experimental	CD1D	P15813	-36.4393	-29.8438
3co1_A	experimental	MAPRE3	Q9UPY8	-36.4333	-27.7795
2wy8_A	experimental	C3 CPAMD1	P01024	-36.4291	-26.2907
1fnh_A	experimental	FN1 FN	P02751	-36.4262	-31.0475
2bbs_A	experimental	CFTR ABCC7	P13569	-36.4257	NA
1wis_A	experimental	SDK2 KIAA1514	Q58EX2	-36.4218	-26.4889
3t8x_A	experimental	CD1B	P29016	-36.4163	-33.6678
3if8_A	experimental	ZWILCH	Q9H900	-36.4159	-23.6466
2kqb_A	experimental	APLF C2orf13 PALF XIP1	Q8IW19	-36.4154	-30.8964
2dn5_A	experimental	GTF2IRD1 CREAM1 GTF3 MUSTRD1 RBAP2 WBSCR11 WBSCR12	Q9UHL9	-36.4116	-27.3812
2g7r_A	experimental	MALT1 MLT	Q9UDY8	-36.4035	-27.8245
1egx_A	experimental	VASP	P50552	-36.4025	-28.1868
2k3g_A	experimental	BMPR1A ACVRLK3 ALK3	P36894	-36.3978	-28.7054
1byg_A	experimental	CSK	P41240	-36.3961	-16.9802
2ojr_A	experimental	RPS27A UBA80 UBCEP1	P62979	-36.3895	-26.4601
2dlx_A	experimental	UBXN7 KIAA0794 UBXD7	O94888	-36.3888	-32.7033
2rep_A	experimental	KIFC1 HSET KNSL2	Q9BW19	-36.3886	-28.1941
2nn6_D	experimental	EXOSC5 CML28 RRP46	Q9NQT4	-36.3864	-31.4857
2he7_A	experimental	EPB41L3 DAL1 KIAA0987	Q9Y2J2	-36.3846	-30.9393
2gw5_A	experimental	LILRB2 ILT4 LIR2 MIR10	Q8N423	-36.3821	-30.4841
1iu1_A	experimental	AP1G1 ADTG CLAPG1	O43747	-36.3805	-28.2153
2d8m_A	experimental	XRCC1	P18887	-36.3804	-27.0135
2dnh_A	experimental	CELF5 BRUNOL5	Q8N6W0	-36.3804	-27.0227
1yde_A	experimental	HSD17B14 DHRS10 SDR3 SDR47C1 UNQ502/PRO474	Q9BPX1	-36.3798	-25.7447
1jkg_B	experimental	NXF1 TAP	Q9UBU9	-36.3753	-40.2141
2cub_A	experimental	NCK1 NCK	P16333	-36.3737	-31.9451
2p01_A	experimental	LRPAP1 A2MRAP	P30533	-36.3728	-28.5542
2zmd_A	experimental	TTK MPS1 MPS1L1	P33981	-36.3635	-27.837
1jfi_C	experimental	TBP GTF2D1 TF2D TFIID	P20226	-36.3604	-31.042
1w7j_B	experimental	MYL6B MLC1SA	P14649	-36.3593	-30.5995
1tfi_A	experimental	TCEA1 GTF2S TFIIS	P23193	-36.3562	-29.6327
2d0j_A	experimental	B3GAT2 GLCATS KIAA1963	Q9NPZ5	-36.3555	-34.1712
2qag_A	experimental	SEPT2 DIFF6 KIAA0158 NEDD5	Q15019	-36.3539	-31.5804
1wx9_A	experimental	BAG6 BAT3 G3	P46379	-36.3361	-34.3654
2edd_A	experimental	DCC IGDCC1	P43146	-36.3313	-32.5645
2bou_A	experimental	ADGRE2 EMR2	Q9UHX3	-36.325	-27.6165
1wwc_A	experimental	NTRK3 TRKC	Q16288	-36.3248	-28.8989
1a66_A	experimental	NFATC1 NFAT2 NFATC	O95644	-36.315	-35.5582
2e8n_A	experimental	EPHA2 ECK	P29317	-36.3146	-32.5823
1h4a_X	experimental	CRYGD CRYG4	P07320	-36.3136	-29.4782
1aud_A	experimental	SNRPA	P09012	-36.3121	-28.7689
2eaq_A	experimental	LMO7 FBX20 FBXO20 KIAA0858	Q8WWI1	-36.3085	-32.8278
1ry7_B	experimental	FGFR3 JTK4	P22607	-36.3057	-37.0105
2dnw_A	experimental	NDUFAB1	O14561	-36.3	-27.6776
1cdz_A	experimental	XRCC1	P18887	-36.2969	-33.2912
3j0s_B	experimental	NA	P60706	-36.2861	-36.0036
1srq_A	experimental	RAP1GAP KIAA0474 RAP1GA1	P47736	-36.2834	-29.2194
3bwy_A	experimental	COMT	P21964	-36.2831	-29.6636
2qj2_A	experimental	HGF HPTA	P14210	-36.2814	-26.9882
1syx_C	experimental	TXNL4A DIM1 TXNL4	P83876	-36.281	-34.4965
1ni2_A	experimental	EZR VIL2	P15311	-36.277	-26.8674
2rhk_B	experimental	NA	P03495	-36.2764	-27.1943
2kx3_A	experimental	UBLCP1	Q8WVY7	-36.2734	-31.5813
3mhw_U	experimental	PLAU	P00749	-36.2719	-10.8939
3thc_A	experimental	GLB1 ELNR1	P16278	-36.2684	-24.122
2qki_C	experimental	C3 CPAMD1	P01024	-36.2671	-29.7038
3k51_B	experimental	TNFRSF6B DCR3 TR6 UNQ186/PRO212	O95407	-36.266	-25.2561
2e8p_A	experimental	ELF3 ERT ESX JEN	P78545	-36.2649	-30.851
2fc7_A	experimental	ZZZ3	Q8IYH5	-36.264	-31.1564
2qzh_A	experimental	CD55 CR DAF	P08174	-36.2616	-23.6567
2wel_A	experimental	CAMK2D CAMKD	Q13557	-36.2516	-33.118
3q4u_A	experimental	ACVR1 ACVRLK2	Q04771	-36.2499	-35.7066
3cw3_A	experimental	AIM1 CRYBG1	Q9Y4K1	-36.2497	-26.7063
2ysg_A	experimental	STXBP4	Q6ZWJ1	-36.2468	-29.6533
1i10_A	experimental	LDHA PIG19	P00338	-36.2422	-36.6294
2qq2_A	experimental	ACOT7 BACH	O00154	-36.2344	-28.7351
3dlq_R	experimental	IL22RA1 IL22R	Q8N6P7	-36.2307	-29.9622
2xn6_A	experimental	SERPINA7 TBG	P05543	-36.2304	-32.5324
2ra4_A	experimental	CCL13 MCP4 NCC1 SCYA13	Q99616	-36.2253	-31.5128
1zrj_A	experimental	HNRNPUL1 E1BAP5 HNRPUL1	Q9BUJ2	-36.2241	-27.521
2a3j_A	experimental	SNRPA	P09012	-36.224	-25.3577
2vig_A	experimental	ACADS	P16219	-36.2222	-31.3606
1y8q_A	experimental	SAE1 AOS1 SUA1 UBLE1A	Q9UBE0	-36.2173	-33.4945
3n7s_B	experimental	CALCRL CGRPR	Q16602	-36.2156	-29.1158
2kwh_A	experimental	RALBP1 RLIP1 RLIP76	Q15311	-36.2146	-32.9775
1mkp_A	experimental	DUSP6 MKP3 PYST1	Q16828	-36.2111	-27.4324
3et1_B	experimental	PPARA NR1C1 PPAR	Q07869	-36.2089	-28.9795
2cr9_A	experimental	PARP1 ADPRT PPOL	P09874	-36.1972	-35.0028
3kfd_A	experimental	TGFB1 TGFB	P01137	-36.1942	-29.646
2dho_A	experimental	IDI1	Q13907	-36.189	-30.1784
3d3k_A	experimental	EDC3 LSM16 YJDC YJEFN2 PP844	Q96F86	-36.1783	-36.6488
3shv_B	experimental	MCPH1	Q8NEM0	-36.1763	-24.0447
1u37_A	experimental	APBA1 MINT1 X11	Q02410	-36.1762	-25.6758
3nmz_A	experimental	APC variant protein	Q4LE70	-36.1758	-27.9145
2f9q_A	experimental	CYP2D6 CYP2DL1	P10635	-36.1666	-27.9758
1zdt_A	experimental	NR5A1 AD4BP FTZF1 SF1	Q13285	-36.1612	-33.4874
2dm2_A	experimental	PALLD KIAA0992 CGI-151	Q8WX93	-36.1554	-31.2991
2ke1_A	experimental	AIRE APECED	O43918	-36.1544	-27.4647
1b3u_A	experimental	PPP2R1A	P30153	-36.153	-23.8332
2dhg_A	experimental	TRNAU1AP SECP43 TRSPAP1	Q9NX07	-36.1513	-26.5713
3ec8_A	experimental	RADIL KIAA1849	Q96JH8	-36.1487	-36.1088
2b9e_A	experimental	NSUN5 NSUN5A WBSCR20 WBSCR20A	Q96P11	-36.1439	-36.6667
3p0y_A	experimental	EGFR ERBB ERBB1 HER1	P00533	-36.1421	-29.7111
3h9e_O	experimental	GAPDHS GAPD2 GAPDH2 GAPDS HSD-35 HSD35	O14556	-36.1387	-34.8566
2nxy_D	experimental	DKFZp686K03196	Q6N095	-36.1362	-30.8232
1dev_B	experimental	ZFYVE9 MADHIP SARA SMADIP	O95405	-36.1354	-29.094
2eeg_A	experimental	PDLIM4 RIL	P50479	-36.1287	-30.8071
2opw_A	experimental	PHYHD1	Q5SRE7	-36.1262	-31.9998
2cih_A	experimental	FTH1 FTH FTHL6 OK/SW-cl.84 PIG15	P02794	-36.1236	-19.0824
3fy1_A	experimental	CHIA	Q9BZP6	-36.1211	-33.8858
2en7_A	experimental	ZNF268	Q14587	-36.1209	-27.9896
2o72_A	experimental	CDH1 CDHE UVO	P12830	-36.1165	-34.2542
1b1c_A	experimental	POR CYPOR	P16435	-36.1151	-40.8911
1pl8_A	experimental	SORD	Q00796	-36.1128	-24.6478
2yk1_H	experimental	NA	2YK1	-36.1102	-27.7157
2dav_A	experimental	MYBPC1 MYBPCS	Q00872	-36.1092	-30.9277
1qk9_A	experimental	MECP2	P51608	-36.1081	-27.0099
1ug3_A	experimental	EIF4G1 EIF4F EIF4G EIF4GI	Q04637	-36.1066	-31.746
2jrz_A	experimental	KDM5C DXS1272E JARID1C SMCX XE169	P41229	-36.1039	-29.8997
3to4_D	experimental	NA	3TO4	-36.1035	-31.2188
1za6_B	experimental	IGH@	Q6GMX6	-36.0958	-34.7854
2d9g_A	experimental	YAF2	Q8IY57	-36.0889	-34.1788
3hl2_B	experimental	SEPSECS TRNP48	Q9HD40	-36.0883	NA
1nbf_A	experimental	USP7 HAUSP	Q93009	-36.0857	-35.3214
1f2l_A	experimental	CX3CL1 FKN NTT SCYD1 A-152E5.2	P78423	-36.0843	-31.7181
3ny1_A	experimental	UBR1	Q8IWV7	-36.0794	-28.954
3khf_A	experimental	MAST3 KIAA0561	O60307	-36.0764	-31.7229
2p6x_A	experimental	PTPN22 PTPN8	Q9Y2R2	-36.0737	-25.0562
1qo5_A	experimental	ALDOB ALDB	P05062	-36.0714	-30.9229
2c7s_A	experimental	PTPRK PTPK	Q15262	-36.068	NA
3pl6_D	experimental	NA	D3YTB3	-36.0637	-28.5344
1ax8_A	experimental	LEP OB OBS	P41159	-36.0588	-27.5526
1x4u_A	experimental	ZFYVE27 SPG33	Q5T4F4	-36.056	-29.5578
1hae_A	experimental	NRG1 GGF HGL HRGA NDF SMDF	Q02297	-36.055	-32.6186
1nw9_B	experimental	CASP9 MCH6	P55211	-36.0518	-24.4335
1t8t_A	experimental	HS3ST3A1 3OST3A1 HS3ST3A UNQ2551/PRO6180	Q9Y663	-36.049	-24.3774
2a1i_A	experimental	ERCC1	P07992	-36.0476	-29.8771
2ec8_A	experimental	KIT SCFR	P10721	-36.0471	-29.0709
1w0u_A	experimental	TERF2 TRBF2 TRF2	Q15554	-36.0449	-30.5581
2dc2_A	experimental	GOPC CAL FIG	Q9HD26	-36.0438	-27.2957
3o70_A	experimental	PHF13	Q86YI8	-36.0416	-24.4004
2stt_A	experimental	ETS1 EWSR2	P14921	-36.0399	-28.9159
1egj_A	experimental	CSF2RB IL3RB IL5RB	P32927	-36.0365	-31.0594
1i8l_A	experimental	CD80 CD28LG CD28LG1 LAB7	P33681	-36.0348	-32.2721
2dc3_A	experimental	CYGB STAP	Q8WWM9	-36.0342	-28.7634
2hhm_A	experimental	IMPA1 IMPA	P29218	-36.0269	-26.9366
2wbj_D	experimental	NA	2WBJ	-36.0256	-35.6709
1ddj_A	experimental	PLG	P00747	-36.0105	-31.2824
1uhl_A	experimental	RXRB NR2B2	P28702	-36.0095	-28.2475
3b6v_A	experimental	KIF3C	O14782	-36.0074	-34.5411
3mmy_A	experimental	RAE1 MRNP41	P78406	-36.0003	-38.5474
2nte_A	experimental	BARD1	Q99728	-35.9858	-27.6427
1q2h_A	experimental	SH2B2 APS	O14492	-35.9834	-32.0881
1w1h_A	experimental	PDPK1 PDK1	O15530	-35.9834	-25.4811
2e5p_A	experimental	PHF1 PCL1	O43189	-35.981	-30.1166
1m54_A	experimental	CBS	P35520	-35.976	-29.218
1fh0_A	experimental	CTSV CATL2 CTSL2 CTSU UNQ268/PRO305	O60911	-35.9752	-31.159
2ctu_A	experimental	ZNF483 KIAA1962 ZKSCAN16	Q8TF39	-35.9668	-28.6764
2qqm_A	experimental	NRP1 NRP VEGF165R	O14786	-35.9625	-36.2436
2b6f_A	experimental	SRXN1 C20orf139 SRX	Q9BYN0	-35.9609	-27.243
1mv3_A	experimental	BIN1 AMPHL	O00499	-35.9529	-33.731
2dkm_A	experimental	COL20A1 KIAA1510	Q9P218	-35.9524	-29.9329
1zy8_B	experimental	DLD GCSL LAD PHE3	P09622	-35.9497	-31.8203
1bpv_A	experimental	TTN	Q8WZ42	-35.946	-32.9689
2ysl_A	experimental	TRIM31 C6orf13 RNF	Q9BZY9	-35.9377	-25.7348
1by8_A	experimental	CTSK CTSO CTSO2	P43235	-35.9376	-29.6548
2d9z_A	experimental	PRKD3 EPK2 PRKCN	O94806	-35.933	-31.9444
2dt7_A	experimental	SF3A3 SAP61	Q12874	-35.93	-31.2583
3ibd_A	experimental	CYP2B6	P20813	-35.9281	-34.6565
3b83_A	experimental	NA	3B83	-35.9276	-28.3377
3ich_A	experimental	PPIB CYPB	P23284	-35.927	-32.5096
3h95_A	experimental	NUDT6 FGF2AS	P53370	-35.9209	-32.9178
1ex0_A	experimental	F13A1 F13A	P00488	-35.9187	-27.1407
2cpx_A	experimental	RBM41	Q96IZ5	-35.9169	-38.5649
3e1i_A	experimental	FGA	P02671	-35.9118	-27.15
2atx_A	experimental	RHOQ ARHQ RASL7A TC10	P17081	-35.9108	-33.1732
2q4g_W	experimental	RNH1 PRI RNH	P13489	-35.9106	-27.6675
3di2_A	experimental	IL7	P13232	-35.9103	-32.7388
3n7q_A	experimental	MTERF1 MTERF	Q99551	-35.9088	-26.9792
1q20_A	experimental	SULT2B1 HSST2	O00204	-35.906	NA
3lqz_A	experimental	HLA-DPA1 HLA-DP1A HLASB	P20036	-35.9033	-26.9919
2x47_A	experimental	MACROD1 LRP16	Q9BQ69	-35.9002	-36.5997
3dem_A	experimental	MASP1 CRARF CRARF1 PRSS5	P48740	-35.8978	-28.8752
3hhr_B	experimental	GHR	P10912	-35.8978	-27.294
2uz9_A	experimental	GDA KIAA1258	Q9Y2T3	-35.8976	-29.9723
3mtl_A	experimental	CDK16 PCTAIRE1 PCTK1	Q00536	-35.894	-36.4597
2ept_A	experimental	ZNF32 KOX30	P17041	-35.8919	-27.6534
3ull_A	experimental	SSBP1 SSBP	Q04837	-35.8883	-29.0853
1bnd_A	experimental	BDNF	P23560	-35.8826	-38.8453
3drz_A	experimental	KCTD5	Q9NXV2	-35.8757	-30.1949
3zyq_A	experimental	HGS HRS	O14964	-35.875	-27.2463
1lj5_A	experimental	SERPINE1 PAI1 PLANH1	P05121	-35.8744	-39.7648
1x4e_A	experimental	RBMS2 SCR3	Q15434	-35.8729	-30.2767
1z5s_D	experimental	RANBP2 NUP358	P49792	-35.8675	-29.306
1zsy_A	experimental	MECR NBRF1 CGI-63	Q9BV79	-35.8671	-32.2883
3syx_A	experimental	SPRED1	Q7Z699	-35.8582	-27.5122
3iza_A	experimental	APAF1 KIAA0413	O14727	-35.8575	-31.2823
2b0o_E	experimental	ASAP3 DDEFL1 UPLC1	Q8TDY4	-35.8459	-32.8077
1ark_A	experimental	NEB	P20929	-35.8388	-28.5101
2eao_A	experimental	EPHB1 ELK EPHT2 HEK6 NET	P54762	-35.8378	-28.7715
2cpd_A	experimental	A1CF ACF ASP	Q9NQ94	-35.8376	-27.4738
2ds4_A	experimental	TRIM45 RNF99	Q9H8W5	-35.8371	-28.6824
2djy_A	experimental	SMURF2	Q9HAU4	-35.836	-29.214
3ivv_A	experimental	SPOP	O43791	-35.8349	-32.329
3a99_A	experimental	PIM1	P11309	-35.8342	-30.0712
2jc9_A	experimental	NT5C2 NT5B NT5CP PNT5	P49902	-35.8274	-27.8018
2pez_A	experimental	PAPSS1 ATPSK1 PAPSS	O43252	-35.8222	-31.2872
2e60_A	experimental	SFRS8	Q8IV81	-35.8179	-30.1893
1ch4_A	experimental	HBB	P68871	-35.8139	-35.1596
1xdt_R	experimental	HBEGF DTR DTS HEGFL	Q99075	-35.8135	-27.3459
1yhn_B	experimental	RILP PP10141	Q96NA2	-35.8116	-23.0398
1ri9_A	experimental	FYB SLAP130	O15117	-35.8091	-33.3316
3smj_A	experimental	PARP14 BAL2 KIAA1268	Q460N5	-35.798	-31.6857
2kz5_A	experimental	NFE2	Q16621	-35.7786	-28.646
2dnx_A	experimental	STX12	Q86Y82	-35.7715	-22.6045
2yrt_A	experimental	CHORDC1 CHP1	Q9UHD1	-35.7698	-24.8647
3fvy_A	experimental	DPP3	Q9NY33	-35.7669	NA
1x1f_A	experimental	STAP1 BRDG1	Q9ULZ2	-35.7659	-31.8445
2kiv_A	experimental	ANKS1B	Q7Z6G8	-35.7646	-29.7335
2d9n_A	experimental	CPSF4 CPSF30 NAR NEB1	O95639	-35.7644	-29.4411
2nzj_A	experimental	REM1 GES REM	O75628	-35.7635	-24.3025
3hqa_A	experimental	C5 CPAMD4	P01031	-35.7603	-31.7238
3lqh_A	experimental	KMT2A ALL1 CXXC7 HRX HTRX MLL MLL1 TRX1	Q03164	-35.7529	-35.6645
2pfi_A	experimental	CLCNKA	P51800	-35.7521	-26.9763
2i4i_A	experimental	DDX3X DBX DDX3	O00571	-35.7519	-31.5034
3lfm_A	experimental	FTO KIAA1752	Q9C0B1	-35.7479	-30.2268
1aui_A	experimental	PPP3CA CALNA CNA	Q08209	-35.7441	-29.0094
2dhz_A	experimental	RAPGEFL1	Q9UHV5	-35.7413	-34.1593
2cso_A	experimental	PLEK P47	P08567	-35.7386	-26.5411
2ghw_B	experimental	NA	Q0ZCG7	-35.7343	-28.1352
3e6i_A	experimental	CYP2E1 CYP2E	P05181	-35.734	-25.8546
3ph9_A	experimental	AGR3 BCMP11 PDIA18 UNQ642/PRO1272	Q8TD06	-35.7286	-27.7663
1u5s_A	experimental	NCK2 GRB4	O43639	-35.7205	-27.3166
2wng_A	experimental	SIRPA BIT MFR MYD1 PTPNS1 SHPS1 SIRP	P78324	-35.7186	-30.6344
1jfn_A	experimental	LPA	P08519	-35.7105	-33.3627
1ozj_A	experimental	SMAD3 MADH3	P84022	-35.7094	-27.1925
2dix_A	experimental	PRKRA PACT RAX HSD-14 HSD14	O75569	-35.7092	-26.5781
2eno_A	experimental	SYNJ2BP OMP25	P57105	-35.7079	-29.6993
2cu7_A	experimental	MYSM1 KIAA1915	Q5VVJ2	-35.7035	-26.4974
3f0w_A	experimental	NUMBL	Q9Y6R0	-35.7029	-31.7841
3c5n_A	experimental	TULP1 TUBL1	O00294	-35.7017	-23.5469
3rbg_A	experimental	CRTAM	O95727	-35.6974	-29.9088
3q8k_A	experimental	FEN1 RAD2	P39748	-35.6973	-35.0063
1j1d_C	experimental	TNNI3 TNNC1	P19429	-35.6964	-29.6871
1onq_A	experimental	CD1A	P06126	-35.6921	-27.8295
2yl4_A	experimental	ABCB10	Q9NRK6	-35.6915	-23.604
1jsu_C	experimental	CDKN1B KIP1	P46527	-35.6865	-27.3465
1le6_A	experimental	PLA2G10	O15496	-35.6862	-33.2089
2ggz_A	experimental	GUCA1C GCAP3	O95843	-35.6847	-23.2804
2kbs_A	experimental	USH1C AIE75	Q9Y6N9	-35.6847	-34.0943
2ar5_A	experimental	PIK3C2A	O00443	-35.6846	-29.7366
2l0s_A	experimental	PLG	P00747	-35.6846	-32.8821
2zqq_A	experimental	AUH	Q13825	-35.6841	-27.9424
1uf0_A	experimental	DCLK1 DCAMKL1 DCDC3A KIAA0369	O15075	-35.6839	-27.0735
1nnl_A	experimental	PSPH	P78330	-35.6836	-30.4387
1h8u_A	experimental	PRG2 MBP	P13727	-35.6816	-35.4349
3d7c_A	experimental	KAT2A GCN5 GCN5L2 HGCN5	Q92830	-35.6764	-28.5174
1p9a_G	experimental	GP1BA	P07359	-35.6742	-36.4356
3adl_A	experimental	TARBP2 TRBP	Q15633	-35.668	-26.9537
3puf_B	experimental	RNASEH2B DLEU8	Q5TBB1	-35.6655	-29.923
1kj6_A	experimental	DEFB103A BD3 DEFB103 DEFB3; DEFB103B	P81534	-35.6651	-33.1731
2dlw_A	experimental	DOK2	O60496	-35.6593	-30.5554
2la6_A	experimental	FUS TLS	P35637	-35.6579	-30.0098
3smz_A	experimental	RAVER1 KIAA1978	Q8IY67	-35.6571	-32.4347
3mmy_B	experimental	NUP98 ADAR2	P52948	-35.6548	-9.7866
3mv7_E	experimental	NA	3MV7	-35.6547	-34.3638
3o8v_A	experimental	FXR1	P51114	-35.6512	-24.5574
2dl4_A	experimental	STAC	Q99469	-35.6482	-28.8036
1fao_A	experimental	DAPP1 BAM32 HSPC066	Q9UN19	-35.6464	-31.1702
1nbq_A	experimental	F11R JAM1 JCAM UNQ264/PRO301	Q9Y624	-35.6463	-29.8498
2emm_A	experimental	ZKSCAN5 KIAA1015 ZFP95	Q9Y2L8	-35.6433	-30.5831
1pbu_A	experimental	EEF1G EF1G PRO1608	P26641	-35.6345	-32.8726
2edf_A	experimental	OBSCN KIAA1556 KIAA1639	Q5VST9	-35.6335	-31.6595
1l1f_A	experimental	GLUD1 GLUD	P00367	-35.6279	-33.0324
3mq4_A	experimental	GRM7 GPRC1G MGLUR7	Q14831	-35.6272	-32.4405
2g4c_A	experimental	POLG2 MTPOLB	Q9UHN1	-35.6269	-25.4504
2ct5_A	experimental	ZBED1 ALTE DREF KIAA0785 TRAMP	O96006	-35.6249	-26.64
2dmf_A	experimental	RNF25	Q96BH1	-35.613	-29.5706
2v9y_A	experimental	GART PGFT PRGS	P22102	-35.6124	-28.4631
1hfh_A	experimental	CFH HF HF1 HF2	P08603	-35.6121	-21.199
2pe4_A	experimental	HYAL1 LUCA1	Q12794	-35.6053	-29.9578
2yu4_A	experimental	NSMCE2 C8orf36 MMS21	Q96MF7	-35.6023	-27.0049
1eqt_A	experimental	CCL5 D17S136E SCYA5	P13501	-35.6014	-31.7977
2eko_A	experimental	KAT5 HTATIP TIP60	Q92993	-35.6011	-23.5301
1ilr_1	experimental	IL1RN IL1F3 IL1RA	P18510	-35.6005	-28.2181
2dle_A	experimental	PTPRJ DEP1	Q12913	-35.598	-38.4153
2cp5_A	experimental	CLIP1 CYLN1 RSN	P30622	-35.5922	-30.4912
2e5r_A	experimental	DTNA DRP3	Q9Y4J8	-35.5884	-29.3364
3tug_A	experimental	ITCH	Q96J02	-35.5874	-27.1656
2vq3_A	experimental	STEAP3 TSAP6	Q658P3	-35.5869	-32.7177
2d92_A	experimental	PATJ INADL	Q8NI35	-35.5867	-28.5082
2vxc_B	experimental	NA	P87074	-35.5842	-24.2676
2ywk_A	experimental	RBM11	P57052	-35.5779	-28.5675
2zw3_A	experimental	GJB2	P29033	-35.5758	NA
1nd6_A	experimental	ACPP	P15309	-35.5757	-27.4315
2w42_B	experimental	NA	O28951	-35.568	-34.7897
2ctd_A	experimental	ZNF512 KIAA1805	Q96ME7	-35.5588	-26.0099
2nzt_A	experimental	HK2	P52789	-35.5585	-36.7411
2phg_A	experimental	GTF2B TF2B TFIIB	Q00403	-35.5581	-33.3476
2jxw_A	experimental	WBP4 FBP21 FNBP21	O75554	-35.5494	-28.9243
3e46_A	experimental	UBE2K HIP2 LIG	P61086	-35.5471	-30.618
2dn8_A	experimental	ACACB ACC2 ACCB	O00763	-35.5443	-27.4707
2ee4_A	experimental	ARHGAP5 RHOGAP5	Q13017	-35.5421	-35.9459
2dky_A	experimental	DLC1 ARHGAP7 KIAA1723 STARD12	Q96QB1	-35.5399	-34.3687
2yst_A	experimental	PCDH7 BHPCDH	O60245	-35.5394	-33.2033
2kdb_A	experimental	HERPUD2	Q9BSE4	-35.5366	-18.8146
2o2k_A	experimental	MTR	Q99707	-35.5366	-32.4393
3q2t_A	experimental	NUDT21 CFIM25 CPSF25 CPSF5	O43809	-35.5293	-34.8161
2nz6_A	experimental	PTPRJ DEP1	Q12913	-35.5247	-27.2959
1irh_A	experimental	TFPI LACI TFPI1	P10646	-35.5241	-31.5666
1fle_I	experimental	PI3 WAP3 WFDC14	P19957	-35.5234	-27.7037
1apy_B	experimental	AGA	P20933	-35.5193	-28.6223
2ocg_A	experimental	BPHL MCNAA	Q86WA6	-35.5191	-32.959
1a6q_A	experimental	PPM1A PPPM1A	P35813	-35.5127	-37.6158
2esk_A	experimental	UBE2D2 PUBC1 UBC4 UBC5B UBCH4 UBCH5B	P62837	-35.51	-30.2705
2kg1_A	experimental	HNRNPF HNRPF	P52597	-35.51	-33.0428
2rey_A	experimental	DVL2	O14641	-35.5086	-32.0423
1g84_A	experimental	IGHE	P01854	-35.5038	-28.6165
2a2c_A	experimental	GALK2 GK2	Q01415	-35.4999	-23.8321
2elz_A	experimental	ZNF224 BMZF2 KOX22 ZNF233 ZNF255 ZNF27	Q9NZL3	-35.4976	-28.2362
3f31_A	experimental	SPTAN1 NEAS SPTA2	Q13813	-35.4972	-35.4224
1h6f_A	experimental	TBX3	O15119	-35.4966	-30.0359
3sbw_B	experimental	NA	Q02242	-35.493	-29.5227
3d9s_A	experimental	AQP5	P55064	-35.489	-34.1288
3qe9_Y	experimental	EXO1 EXOI HEX1	Q9UQ84	-35.4868	-35.5334
3o8y_A	experimental	ALOX5 LOG5	P09917	-35.4856	-20.0755
1eer_A	experimental	EPO	P01588	-35.4847	-26.4111
3erb_A	experimental	C2	P06681	-35.4811	-23.4589
1r74_A	experimental	GNMT	Q14749	-35.4796	-30.6046
2nms_A	experimental	CD300LF CD300F CLM1 IGSF13 IREM1 NKIR UNQ3105/PRO10111	Q8TDQ1	-35.4734	-26.6083
2uyy_A	experimental	GLYR1 HIBDL NP60	Q49A26	-35.4675	-29.0997
2cpw_A	experimental	UBASH3B KIAA1959 STS1	Q8TF42	-35.4645	-23.3356
2wnv_C	experimental	C1QC C1QG	P02747	-35.4638	-25.4237
2das_A	experimental	ZMYM5 ZNF198L1 ZNF237 HSPC050	Q9UJ78	-35.4589	-27.2943
2pny_A	experimental	IDI2	Q9BXS1	-35.4562	-33.765
2jju_A	experimental	SIRPB1	O00241	-35.4531	-29.6645
3t5g_B	experimental	PDE6D PDED	O43924	-35.4498	-27.6699
3pdy_A	experimental	PLEC PLEC1	Q15149	-35.4493	-32.5838
2fj4_A	experimental	MT3	P25713	-35.4446	-27.567
2ea6_A	experimental	RNF4 SNURF RES4-26	P78317	-35.4373	-27.1612
3n50_A	experimental	EBF3 COE3	Q9H4W6	-35.434	-30.1155
2h62_C	experimental	BMPR1A ACVRLK3 ALK3	P36894	-35.4295	-30.708
1b72_B	experimental	PBX1 PRL	P40424	-35.4284	-35.7433
2fx7_H	experimental	NA	Q6PYX1	-35.4282	-24.5441
2jxy_A	experimental	MMP12 HME	P39900	-35.4277	-30.966
2dt6_A	experimental	SF3A1 SAP114	Q15459	-35.4273	-26.5476
2hlw_A	experimental	UBE2V1 CROC1 UBE2V UEV1 P/OKcl.19	Q13404	-35.4257	-29.9779
1tvg_A	experimental	HSPB11 C1orf41 IFT25 HSPC034	Q9Y547	-35.4222	-32.0264
2kr0_A	experimental	ADRM1 GP110	Q16186	-35.4195	-26.2193
3soe_A	experimental	MAGI3 KIAA1634	Q5TCQ9	-35.4164	-27.9321
2ivs_A	experimental	RET CDHF12 CDHR16 PTC RET51	P07949	-35.4093	-28.6882
2qag_B	experimental	SEPT6 KIAA0128 SEP2	Q14141	-35.4083	-27.5025
2wqr_A	experimental	IGHE	P01854	-35.4028	-30.4713
2r3v_A	experimental	MVK	Q03426	-35.4011	-27.5109
1joc_A	experimental	EEA1 ZFYVE2	Q15075	-35.4002	-29.0717
1g1s_A	experimental	SELP GMRP GRMP	P16109	-35.3985	-29.3748
1umk_A	experimental	CYB5R3 DIA1	P00387	-35.3967	-32.8813
3qkd_A	experimental	BCL2L1 BCL2L BCLX	Q07817	-35.393	-29.3146
1lck_A	experimental	LCK	P06239	-35.3917	-25.4476
2dii_A	experimental	GTF2H1 BTF2	P32780	-35.3831	-26.794
1kfa_H	experimental	NA	1KFA	-35.3827	-28.6708
1orf_A	experimental	GZMA CTLA3 HFSP	P12544	-35.3781	-28.819
2egc_A	experimental	SH3PXD2A FISH KIAA0418 SH3MD1 TKS5	Q5TCZ1	-35.3751	-25.6784
2ihc_A	experimental	BACH1	O14867	-35.3723	-29.421
3dlx_A	experimental	OXCT1 OXCT SCOT	P55809	-35.3705	-33.7901
2yuj_A	experimental	UFD1L	Q92890	-35.369	-31.5622
2k8p_A	experimental	SOST UNQ2976/PRO7455/PRO7476	Q9BQB4	-35.3645	-26.9652
3hx0_A	experimental	POLL	Q9UGP5	-35.3645	-30.9159
2hgm_A	experimental	HNRNPF HNRPF	P52597	-35.3634	-27.7823
2dj4_A	experimental	FLNB FLN1L FLN3 TABP TAP	O75369	-35.3633	-32.014
2y6d_A	experimental	MMP7 MPSL1 PUMP1	P09237	-35.3588	-36.2276
1wg5_A	experimental	HNRNPH2 FTP3 HNRPH2	P55795	-35.3573	-33.7829
1wgx_A	experimental	MIS18BP1 C14orf106 KIAA1903 KNL2 M18BP1	Q6P0N0	-35.3573	-25.1164
2jam_A	experimental	CAMK1G CLICK3 VWS1	Q96NX5	-35.3568	-30.6347
2ppi_A	experimental	GAN GAN1 KLHL16	Q9H2C0	-35.3552	-30.9266
2cqb_A	experimental	PPIE CYP33	Q9UNP9	-35.3548	-27.2446
2kbx_B	experimental	LIMS1 PINCH PINCH1	P48059	-35.3532	-27.5231
3rnj_A	experimental	BAIAP2	Q9UQB8	-35.349	-28.4523
2d7m_A	experimental	FLNC ABPL FLN2	Q14315	-35.3487	-29.3729
2hr7_A	experimental	INSR	P06213	-35.3486	-35.1732
2jx2_A	experimental	NELFE RD RDBP	P18615	-35.3456	-28.3235
2dk5_A	experimental	POLR3F	Q9H1D9	-35.3453	-29.173
2p28_B	experimental	ITGB2 CD18 MFI7	P05107	-35.3429	-35.874
2fby_A	experimental	WRN RECQ3 RECQL2	Q14191	-35.341	-33.2269
2kms_A	experimental	CFH HF HF1 HF2	P08603	-35.3334	-25.3777
2dl5_A	experimental	FCHSD2 KIAA0769 SH3MD3	O94868	-35.3315	-28.0149
2jlp_A	experimental	SOD3	P08294	-35.3309	-28.2044
1tdh_A	experimental	NEIL1	Q96FI4	-35.3255	-30.1289
1nuu_A	experimental	NMNAT3 FKSG76	Q96T66	-35.3208	-24.6818
2epw_A	experimental	ZNF268	Q14587	-35.3134	-29.434
2y6w_A	experimental	BCL2L2 BCLW KIAA0271	Q92843	-35.3098	-28.35
2jyi_A	experimental	KMT2A ALL1 CXXC7 HRX HTRX MLL MLL1 TRX1	Q03164	-35.3073	-28.8067
2yrv_A	experimental	ARID4A RBBP1 RBP1	P29374	-35.3059	-30.5381
2igp_A	experimental	NDC80 HEC HEC1 KNTC2	O14777	-35.3025	-31.9078
2qxi_A	experimental	KLK7 PRSS6 SCCE	P49862	-35.3019	-26.2648
2dnt_A	experimental	CDYL CDYL1	Q9Y232	-35.3018	-34.2217
3cxl_A	experimental	CHN1 ARHGAP2 CHN	P15882	-35.2986	-24.7421
2h2t_B	experimental	FCER2 CD23A CLEC4J FCE2 IGEBF	P06734	-35.2952	-25.515
2xai_A	experimental	ASB9	Q96DX5	-35.2943	-27.7751
2dm0_A	experimental	TXK PTK4 RLK	P42681	-35.2932	-9.75585
2h2b_A	experimental	TJP1 ZO1	Q07157	-35.2922	-27.8022
3e1r_A	experimental	CEP55 C10orf3 URCC6	Q53EZ4	-35.292	-25.9408
3s2k_B	experimental	LRP6	O75581	-35.2919	-24.0476
2wa0_A	experimental	MAGEA4 MAGE4	P43358	-35.29	-32.7305
3qeq_D	experimental	TRAC TCRA	P01848	-35.2873	-26.4715
2kjx_A	experimental	JTB HSPC222	O76095	-35.2859	-22.0398
2jox_A	experimental	CHURC1 C14orf52 CHCH My015	Q8WUH1	-35.2849	-28.5338
3r62_A	experimental	CFH HF HF1 HF2	P08603	-35.2849	-25.5193
3ldo_A	experimental	HSPA5 GRP78	P11021	-35.2802	-29.6299
2kn7_A	experimental	ERCC4 ERCC11 XPF	Q92889	-35.2799	-31.4113
2p1b_A	experimental	NPM1 NPM	P06748	-35.2773	-24.6408
2bme_A	experimental	RAB4A RAB4	P20338	-35.276	-31.2452
2yrg_A	experimental	TRIM5 RNF88	Q9C035	-35.2749	-32.1262
1mqb_A	experimental	EPHA2 ECK	P29317	-35.2726	-30.4114
1fst_A	experimental	ARHGDIA GDIA1	P52565	-35.2722	-27.1591
2oay_A	experimental	SERPING1 C1IN C1NH	P05155	-35.2673	-24.2736
1x2n_A	experimental	PKNOX1 PREP1	P55347	-35.2656	-30.1802
2rqp_A	experimental	HP1BP3	Q5SSJ5	-35.2639	-23.927
2acj_A	experimental	ADAR ADAR1 DSRAD G1P1 IFI4	P55265	-35.2629	-34.4171
1w6k_A	experimental	LSS OSC	P48449	-35.2609	NA
2ous_A	experimental	PDE10A	Q9Y233	-35.2586	-32.6463
2w51_A	experimental	MANF ARMET ARP	P55145	-35.2577	-28.604
2cob_A	experimental	LCOR KIAA1795 MLR2	Q96JN0	-35.2546	-29.921
2ig2_H	experimental	IGHV3-33	P01772	-35.2535	-28.4274
3clz_A	experimental	UHRF1 ICBP90 NP95 RNF106	Q96T88	-35.251	-31.3427
2v5p_A	experimental	IGF2R MPRI	P11717	-35.2497	-33.24
1hra_A	experimental	RARB HAP NR1B2	P10826	-35.2493	-33.5802
1n3l_A	experimental	YARS	P54577	-35.2485	-32.0817
2ysd_A	experimental	MAGI1 AIP3 BAIAP1 BAP1 TNRC19	Q96QZ7	-35.2452	-27.9511
2dku_A	experimental	OBSCN KIAA1556 KIAA1639	Q5VST9	-35.2418	-30.0639
2cpq_A	experimental	FXR1	P51114	-35.2406	-26.1932
1z6u_A	experimental	UHRF2 NIRF RNF107	Q96PU4	-35.2365	-28.5339
2nnj_A	experimental	CYP2C8	P10632	-35.2355	-25.6514
3bfn_A	experimental	KIF22 KID KNSL4	Q14807	-35.2354	-29.1048
2wwy_A	experimental	RECQL RECQ1 RECQL1	P46063	-35.2334	-25.4871
2knh_A	experimental	RUNX1T1 AML1T1 CBFA2T1 CDR ETO MTG8 ZMYND2	Q06455	-35.2277	-25.9167
3gg6_A	experimental	NUDT18 MTH3	Q6ZVK8	-35.2223	-29.9131
2fn4_A	experimental	RRAS	P10301	-35.219	-28.4125
2ddi_A	experimental	WFIKKN1 C16orf12 GASP2 WFIKKN PSEC0040	Q96NZ8	-35.2178	-26.1762
1ity_A	experimental	TERF1 PIN2 TRBF1 TRF TRF1	P54274	-35.2119	-28.628
3rf3_A	experimental	VCL	P18206	-35.2097	-26.9104
2e5s_A	experimental	MBNL2 MBLL MBLL39 MLP1	Q5VZF2	-35.201	-23.8846
1t08_B	experimental	CTNNBIP1 ICAT	Q9NSA3	-35.1947	-26.499
2kv8_A	experimental	RGS12	O14924	-35.1931	-29.0821
2evz_A	experimental	PTBP1 PTB	P26599	-35.1925	-29.9116
4aaa_A	experimental	CDKL2	Q92772	-35.1924	-24.5946
1g9l_A	experimental	PABPC1 PAB1 PABP1 PABPC2	P11940	-35.1904	-31.141
3hms_A	experimental	HGF HPTA	P14210	-35.188	-24.8732
3jvf_B	experimental	IL17F	Q96PD4	-35.1875	-28.6439
3rpi_L	experimental	NA	3RPI	-35.1821	-30.1254
1iar_B	experimental	IL4R IL4RA 582J2.1	P24394	-35.1738	-34.1314
2kup_A	experimental	FRS3	O43559	-35.1688	-26.173
3k0w_A	experimental	MALT1 MLT	Q9UDY8	-35.1678	-29.6596
1j8c_A	experimental	UBQLN2 N4BP4 PLIC2 HRIHFB2157	Q9UHD9	-35.1644	-29.9131
1imh_C	experimental	NFAT5 KIAA0827 TONEBP	O94916	-35.1627	-31.5464
3fdo_A	experimental	MDM4 MDMX	O15151	-35.1573	-29.2053
2rnl_A	experimental	AREG AREGB SDGF	P15514	-35.1559	-30.6339
1mp8_A	experimental	PTK2 FAK FAK1	Q05397	-35.1553	-28.0035
1x6e_A	experimental	ZNF24 KOX17 ZNF191 ZSCAN3	P17028	-35.1552	-29.5769
1wa7_A	experimental	LYN JTK8	P07948	-35.1512	-28.4408
2cq3_A	experimental	RBFOX2 FOX2 HRNBP2 RBM9 RTA	O43251	-35.1476	-26.4294
2qrv_B	experimental	DNMT3L	Q9UJW3	-35.1475	-33.7732
2en6_A	experimental	ZNF268	Q14587	-35.1463	-29.0979
2en8_A	experimental	ZNF224 BMZF2 KOX22 ZNF233 ZNF255 ZNF27	Q9NZL3	-35.1455	-29.005
1qip_A	experimental	GLO1	Q04760	-35.1404	-31.8377
2vtb_C	experimental	NA	Q84KJ5	-35.1345	-29
3eto_A	experimental	NOTCH1 TAN1	P46531	-35.1337	-36.3933
2vsp_A	experimental	PDZK1 CAP70 NHERF3 PDZD1	Q5T2W1	-35.1298	-35.4487
3fs1_A	experimental	HNF4A HNF4 NR2A1 TCF14	P41235	-35.128	-29.0435
3dsh_A	experimental	IRF5	Q13568	-35.1278	-37.6216
2dm4_A	experimental	SORL1 C11orf32	Q92673	-35.1256	-22.6459
2foz_A	experimental	ADPRHL2 ARH3	Q9NX46	-35.1253	-26.2671
1lyb_B	experimental	CTSD CPSD	P07339	-35.1236	-25.2525
1kgd_A	experimental	CASK LIN2	O14936	-35.1232	-27.5113
2q8k_A	experimental	PA2G4 EBP1	Q9UQ80	-35.1173	-28.3464
2vpj_A	experimental	KLHL12 C3IP1	Q53G59	-35.1151	-29.0239
2ctl_A	experimental	HDLBP HBP VGL	Q00341	-35.1094	-37.9866
2ysf_A	experimental	ITCH	Q96J02	-35.1089	-26.5062
1mgx_A	experimental	F9	P00740	-35.1088	-25.5115
2v24_A	experimental	SPSB4 SSB4	Q96A44	-35.108	-29.9366
3fn1_B	experimental	UBE2F NCE2	Q969M7	-35.1044	-29.1097
3rpg_C	experimental	RNF2 BAP1 DING HIPI3 RING1B	Q99496	-35.1031	-29.6941
3tem_A	experimental	NQO2 NMOR2	P16083	-35.0999	-27.5263
3ojy_A	experimental	C8A	P07357	-35.0991	-32.4294
3l5h_A	experimental	IL6ST	P40189	-35.0983	-26.27
2gys_A	experimental	CSF2RB IL3RB IL5RB	P32927	-35.0974	-27.9489
2ok3_A	experimental	PPIL3	Q9H2H8	-35.0958	-27.8256
2ecv_A	experimental	TRIM5 RNF88	Q9C035	-35.0954	-29.0583
2d9p_A	experimental	PABPC3 PABP3 PABPL3	Q9H361	-35.0945	-24.4028
1i1n_A	experimental	PCMT1	P22061	-35.0926	-29.8222
2egq_A	experimental	NA	Q6IB30	-35.0908	-29.1086
3odc_A	experimental	PARP1 ADPRT PPOL	P09874	-35.0907	-23.8929
1fyj_A	experimental	EPRS GLNS PARS QARS QPRS PIG32	P07814	-35.0899	-27.2254
2v5o_A	experimental	IGF2R MPRI	P11717	-35.0848	-24.4365
3hng_A	experimental	FLT1 FLT FRT VEGFR1	P17948	-35.0842	-32.2923
2iuh_A	experimental	PIK3R1 GRB1	P27986	-35.0819	-27.1232
1xcg_A	experimental	ARHGEF11 KIAA0380	O15085	-35.0804	-31.9702
2iyb_A	experimental	ENAH MENA	Q8N8S7	-35.0786	-27.3561
2y9b_H	experimental	SNRPB COD SNRPB1	P14678	-35.0723	-24.3464
3rn8_A	experimental	GRIA2 GLUR2	P42262	-35.0715	-25.506
2y8g_A	experimental	RANBP3	Q9H6Z4	-35.0706	-22.9448
1o8r_A	experimental	GUCA2A GUCA2	Q02747	-35.0658	-24.6609
3dtp_A	experimental	NA	P10587	-35.0624	-36.6426
3poz_A	experimental	EGFR ERBB ERBB1 HER1	P00533	-35.062	-31.4706
2x6l_A	experimental	CCL4 LAG1 MIP1B SCYA4	P13236	-35.0616	-28.6253
2dbk_A	experimental	CRKL	P46109	-35.0609	-29.1493
1hcc_A	experimental	CFH HF HF1 HF2	P08603	-35.0553	-29.093
2e5j_A	experimental	MTHFSD	Q2M296	-35.0539	-30.0869
2fmm_A	experimental	CBX1 CBX	P83916	-35.0538	-27.3635
2l9s_A	experimental	PHF12 KIAA1523	Q96QT6	-35.0507	-35.318
1dtj_A	experimental	NOVA2 ANOVA NOVA3	Q9UNW9	-35.0504	-26.791
3kcg_I	experimental	SERPINC1 AT3 PRO0309	P01008	-35.0471	-29.3244
1n1a_A	experimental	FKBP4 FKBP52	Q02790	-35.0467	-34.0692
2ik8_B	experimental	RGS16 RGSR	O15492	-35.0437	-29.4055
2dgs_A	experimental	DAZAP1	Q96EP5	-35.0416	-36.2913
2fdb_M	experimental	FGF8 AIGF	P55075	-35.0398	-29.0171
2h4u_A	experimental	ACOT13 THEM2 HT012 PNAS-27	Q9NPJ3	-35.039	-31.1801
1uep_A	experimental	MAGI2 ACVRINP1 AIP1 KIAA0705	Q86UL8	-35.0366	-26.6817
1ck7_A	experimental	MMP2 CLG4A	P08253	-35.0359	-28.0356
2dlh_A	experimental	PTPRD	P23468	-35.035	-28.3234
1j8u_A	experimental	PAH	P00439	-35.0331	-37.4295
3rq4_A	experimental	KMT5C SUV420H2 PP7130	Q86Y97	-35.0324	-34.4531
1gen_A	experimental	MMP2 CLG4A	P08253	-35.0299	-33.2995
2kdd_A	experimental	CDCA8 PESCRG3	Q53HL2	-35.0271	-29.8772
2ej4_A	experimental	ZIC3 ZNF203	O60481	-35.0263	-28.2007
2yd9_A	experimental	PTPRS	Q13332	-35.0258	-27.5675
2l6u_A	experimental	MED25 ACID1 ARC92 PTOV2 TCBAP0758	Q71SY5	-35.0225	-32.7388
1jlj_A	experimental	GPHN GPH KIAA1385	Q9NQX3	-35.0177	-25.8529
2epz_A	experimental	ZFP28 KIAA1431	Q8NHY6	-35.0137	-31.528
2rr3_B	experimental	OSBP OSBP1	P22059	-35.0135	-29.4581
3a4u_B	experimental	MCFD2 SDNSF	Q8NI22	-35.01	-40.3924
1su3_A	experimental	MMP1 CLG	P03956	-35.0055	-30.4478
2zv6_A	experimental	SERPINB3 SCCA SCCA1	P29508	-35.0032	-15.1098
1jqe_A	experimental	HNMT	P50135	-35.0023	-30.8225
1bnd_B	experimental	NTF3	P20783	-35.001	-33.508
3ncl_A	experimental	ST14 PRSS14 SNC19 TADG15	Q9Y5Y6	-35	-27.2274
2jrh_A	experimental	MAP3K3 MAPKKK3 MEKK3	Q99759	-34.9997	-27.5664
1ue9_A	experimental	ITSN2 KIAA1256 SH3D1B SWAP	Q9NZM3	-34.9987	-27.5098
2yvi_A	experimental	ANK1 ANK	P16157	-34.9971	-30.5823
3fo5_A	experimental	ACOT11 BFIT KIAA0707 THEA	Q8WXI4	-34.9953	-24.5833
2ec4_A	experimental	FAF1 UBXD12 UBXN3A CGI-03	Q9UNN5	-34.9922	-39.0819
1efv_A	experimental	ETFA	P13804	-34.9896	-32.641
2q80_A	experimental	GGPS1	O95749	-34.989	-29.9865
2ct6_A	experimental	SH3BGRL2 FASH3	Q9UJC5	-34.9886	-27.6228
2kyk_A	experimental	ITCH	Q96J02	-34.9879	-25.7089
2yrn_A	experimental	NAV2 HELAD1 KIAA1419 POMFIL2 RAINB1 STEERIN2	Q8IVL1	-34.9852	-21.7002
2dfd_A	experimental	MDH2	P40926	-34.9844	-33.4042
2om5_A	experimental	CNTN2 AXT TAG1 TAX1	Q02246	-34.9835	-26.3925
1oa8_A	experimental	ATXN1 ATX1 SCA1	P54253	-34.9816	-31.5125
1ycs_B	experimental	TP53BP2 ASPP2 BBP	Q13625	-34.9754	-27.6873
2ed9_A	experimental	DCC IGDCC1	P43146	-34.969	-29.1927
3op8_A	experimental	APOH B2G1	P02749	-34.9652	-25.5387
1pls_A	experimental	PLEK P47	P08567	-34.9605	-27.8641
2dhj_A	experimental	ARHGAP21 ARHGAP10 KIAA1424	Q5T5U3	-34.9598	-27.692
1r42_A	experimental	ACE2 UNQ868/PRO1885	Q9BYF1	-34.9594	-29.4261
1zd1_A	experimental	SULT4A1 SULTX3	Q9BR01	-34.9578	-19.6276
2gfu_A	experimental	MSH6 GTBP	P52701	-34.9526	-29.4251
2v8s_V	experimental	VTI1B VTI1 VTI1L VTI1L1 VTI2	Q9UEU0	-34.9488	-26.8153
2yqe_A	experimental	KDM5D HY HYA JARID1D KIAA0234 SMCY	Q9BY66	-34.9484	-28.6708
3b5h_A	experimental	BSG UNQ6505/PRO21383	P35613	-34.9431	-25.1467
1ujd_A	experimental	PCLO ACZ KIAA0559	Q9Y6V0	-34.9413	-29.5959
2izr_A	experimental	CSNK1G3	Q9Y6M4	-34.9401	-29.9526
3gn8_A	experimental	NA	3GN8	-34.9391	-27.5731
3nvn_B	experimental	PLXNC1 VESPR	O60486	-34.9384	-36.3944
3ygs_P	experimental	CASP9 MCH6	P55211	-34.9382	-28.7356
3c5w_A	experimental	PPP2R1A	P30153	-34.9358	-28.1475
1sxe_A	experimental	ERG	P11308	-34.9333	-24.2037
2ecy_A	experimental	TRAF3 CAP1 CRAF1	Q13114	-34.9332	-27.9665
1zr5_A	experimental	H2AFY MACROH2A1	O75367	-34.9323	-32.7882
1ufi_A	experimental	CENPB	P07199	-34.9318	-28.8421
1wwv_A	experimental	CNKSR1 CNK1	Q969H4	-34.929	-32.3659
1ov3_A	experimental	NCF1 NOXO2 SH3PXD1A	P14598	-34.9227	-23.595
3zzw_A	experimental	ROR2 NTRKR2	Q01974	-34.919	-20.9184
2c0c_A	experimental	ZADH2 PTGR3	Q8N4Q0	-34.9155	-31.2018
1whb_A	experimental	USP8 KIAA0055 UBPY	P40818	-34.9126	-27.4218
3d3l_A	experimental	ALOX12 12LO LOG12	P18054	-34.9114	NA
2b5i_B	experimental	IL2RB	P14784	-34.9008	-27.8824
2eyw_A	experimental	CRK	P46108	-34.9001	-31.9344
1mox_A	experimental	EGFR ERBB ERBB1 HER1	P00533	-34.8995	-28.6252
3cuq_A	experimental	SNF8 EAP30	Q96H20	-34.8989	-31.85
2r2p_A	experimental	EPHA5 BSK EHK1 HEK7 TYRO4	P54756	-34.8919	-25.8661
2oj4_A	experimental	RGS3	P49796	-34.8915	-29.6427
2dn0_A	experimental	ZHX3 KIAA0395 TIX1	Q9H4I2	-34.8902	-29.236
1wh1_A	experimental	PDZRN3 KIAA1095 LNX3 SEMCAP3	Q9UPQ7	-34.8892	-26.793
2dnz_A	experimental	RBM23 RNPC4 PP239	Q86U06	-34.8874	-31.0092
1l2h_A	experimental	IL1B IL1F2	P01584	-34.8858	-27.7429
3h11_A	experimental	CFLAR CASH CASP8AP1 CLARP MRIT	O15519	-34.8844	-24.9774
1by1_A	experimental	ARHGEF7 COOL1 KIAA0142 P85SPR PAK3BP PIXB Nbla10314	Q14155	-34.8837	-20.534
2l08_A	experimental	UPF3A RENT3A UPF3	Q9H1J1	-34.8829	-24.9139
1d2j_A	experimental	LDLR	P01130	-34.8811	-28.8612
2edq_A	experimental	OBSCN KIAA1556 KIAA1639	Q5VST9	-34.8809	-25.8132
2r7e_B	experimental	F8 F8C	P00451	-34.8791	-28.7382
2jnb_A	experimental	SNU13 NHP2L1	P55769	-34.8778	-27.6202
1sqw_A	experimental	NIP7 CGI-37 HSPC031 HSPC180 OK/SW-cl.76 OK/SW-cl.78	Q9Y221	-34.8754	NA
2ct4_A	experimental	TRIP10 CIP4 STOT STP	Q15642	-34.8648	-25.507
1fxy_A	experimental	PRSS1 TRP1 TRY1 TRYP1	P07477	-34.8618	-28.9563
1m3g_A	experimental	DUSP2 PAC1	Q05923	-34.86	-31.5314
2bgr_A	experimental	DPP4 ADCP2 CD26	P27487	-34.8515	-29.0989
2c7n_A	experimental	RABGEF1 RABEX5	Q9UJ41	-34.8509	-23.0003
1t32_A	experimental	CTSG	P08311	-34.848	-27.6602
1oz2_A	experimental	L3MBTL1 KIAA0681 L3MBT L3MBTL	Q9Y468	-34.8437	-34.0585
2gut_A	experimental	MED15 ARC105 CTG7A PCQAP TIG1 TNRC7	Q96RN5	-34.8399	-12.2057
2kbq_A	experimental	USH1C AIE75	Q9Y6N9	-34.8345	-32.9636
2e5k_A	experimental	UBASH3B KIAA1959 STS1	Q8TF42	-34.8255	-26.8598
1hry_A	experimental	SRY TDF	Q05066	-34.818	-24.0553
1j8h_D	experimental	NA	RWHUAC	-34.8111	-28.011
2r2n_A	experimental	AADAT KAT2	Q8N5Z0	-34.8069	-25.7323
2le3_A	experimental	CPT1A CPT1	P50416	-34.7989	-23.8281
2d9k_A	experimental	TRAFD1 FLN29	O14545	-34.7974	-26.0056
2kie_A	experimental	OCRL INPP5F OCRL1	Q01968	-34.796	-28.5224
2k7b_A	experimental	CABP1	Q9NZU7	-34.7955	-29.876
1fsb_A	experimental	SELP GMRP GRMP	P16109	-34.7897	-32.0642
3lrg_A	experimental	NA	3LRG	-34.7789	-25.8281
2yu5_A	experimental	ZNF473 KIAA1141 ZFP100	Q8WTR7	-34.7788	-24.8876
2xb1_A	experimental	PYGO2 PP7910	Q9BRQ0	-34.776	-29.5648
2f15_A	experimental	PRKAB2	O43741	-34.7738	-27.6601
1wyr_A	experimental	ARHGEF6 COOL2 KIAA0006 PIXA	Q15052	-34.7711	-28.4156
3tcx_A	experimental	ICAM1	P05362	-34.7707	-29.715
3b84_A	experimental	ZBTB48 HKR3 ZNF855	P10074	-34.7688	-26.2429
3gz9_A	experimental	PPARD NR1C2 PPARB	Q03181	-34.7679	-34.6318
3krm_A	experimental	IGF2BP1 CRDBP VICKZ1 ZBP1	Q9NZI8	-34.7669	-29.8056
2qfe_A	experimental	CAPN7 PALBH	Q9Y6W3	-34.7651	-23.5387
2zme_C	experimental	VPS25 DERP9 EAP20	Q9BRG1	-34.7587	-30.5829
3j0k_J	experimental	NA	3J0K	-34.7583	-38.847
2yg2_A	experimental	APOM G3A NG20 HSPC336	O95445	-34.7532	-29.9161
1anx_A	experimental	ANXA5 ANX5 ENX2 PP4	P08758	-34.7472	-28.4508
1x45_A	experimental	APBA1 MINT1 X11	Q02410	-34.7406	-27.6389
1pgz_A	experimental	HNRNPA1 HNRPA1	P09651	-34.7399	-35.1719
1fl0_A	experimental	AIMP1 EMAP2 SCYE1	Q12904	-34.7375	-27.6404
1adq_H	experimental	NA	1ADQ	-34.7371	-25.7699
2rk3_A	experimental	PARK7	Q99497	-34.7361	-29.9981
[truncated: 12,596 more rows]
