# Supplementary material for: Inhibition of 12/15-Lipoxygenase Protects Against β-Cell Oxidative Stress and Glycemic Deterioration in Mouse Models of Type 1 Diabetes
Source: Oxford University Press journal article supplement (doi:10.2337/db17-0215), 2017-08-25
Supplement: db170215supplementarydata3.xlsx [file db170215supplementarydata3.xlsx]

## Sheet: Sheet1
	PIC vs. PIC+ ML351
Gene_symbol	Log2FoldChange	PValue	FDR
Cyp1a1	-4.17973	3.94306e-22	5.55538e-18
Mat2a	0.561902	1.93242e-11	6.22324e-08
Vwf	-3.99981	2.63589e-10	6.18952e-07
Dbpht2	0.949089	1.05527e-09	2.12396e-06
Gpd1	-0.475523	4.96203e-08	3.81207e-05
Itch	0.407713	5.57475e-08	3.81207e-05
Xpo1	0.35742	5.68199e-08	3.81207e-05
Ppip5k2	0.463463	6.45128e-08	4.13146e-05
Rph3al	-0.359318	9.65487e-08	5.5884e-05
Maged2	-0.369021	1.10512e-07	5.98845e-05
Nr4a1	1.58664	1.59774e-07	8.33726e-05
Rab27b	1.48353	3.21831e-07	0.000151143
Pfkfb2	0.418809	3.79228e-07	0.000166967
Edem3	0.383369	5.06357e-07	0.000216184
Sstr3	-0.365201	7.01768e-07	0.000274645
Lrrc10b	0.451019	8.22134e-07	0.000313055
Wdr90	0.861044	8.78695e-07	0.000325788
Slc37a4	-0.358197	1.16286e-06	0.000409588
Prkci	0.410555	1.34883e-06	0.000456587
Dnal4	0.413251	1.36111e-06	0.000456587
Ndn	-0.391353	1.90935e-06	0.000611381
Cdh2	-0.36907	2.15813e-06	0.000675686
Bhlha15	0.565934	3.68142e-06	0.00104587
Btg2	0.379371	4.76613e-06	0.00131667
Ankrd10	0.341749	6.20281e-06	0.0016806
Cplx2	-0.490889	6.51921e-06	0.0017249
Hhex	1.06834	6.61116e-06	0.0017249
Ophn1	1.00167	6.87054e-06	0.00175998
Eng	-0.655933	7.072e-06	0.00177924
Sorbs2	0.395586	7.75657e-06	0.00188418
Brca2	1.8214	7.97868e-06	0.00190528
Nfxl1	0.420556	9.00157e-06	0.00206541
Tob1	0.495576	9.47033e-06	0.0021179
Etv5	0.800084	1.04909e-05	0.00230947
Oprl1	-4.19594	1.24022e-05	0.0026475
Rnft1	0.454341	1.70711e-05	0.00316467
Disp2	-0.34014	1.75979e-05	0.00321995
Syndig1l	-0.302952	1.84817e-05	0.00329605
Ppl	0.68314	1.89214e-05	0.00333229
Adk	0.320171	1.93744e-05	0.00336996
Slc9a9	-0.546784	1.97025e-05	0.00338523
Plvap	-1.09422	2.11331e-05	0.0035839
Zfp260	0.330428	2.14677e-05	0.0035839
P4htm	-0.370621	2.18478e-05	0.0035839
Plod1	-0.358588	2.32329e-05	0.00367784
Cth	1.72686	2.44608e-05	0.00376236
Apobec1	0.349927	2.45679e-05	0.00376236
Enpp2	-0.320273	2.54526e-05	0.00385593
Cyp39a1	1.14932	2.61862e-05	0.00392487
Vil1	-0.402564	2.96776e-05	0.00431059
Golim4	0.311442	3.28206e-05	0.00467109
Gmppb	0.310986	3.34664e-05	0.00467109
Gls2	1.36656	3.37346e-05	0.00467109
Stil	3.66057	3.38019e-05	0.00467109
Ugt8a	4.06561	3.38172e-05	0.00467109
Loxl2	-0.625804	3.42745e-05	0.00468829
Mir6236	-0.619152	3.97218e-05	0.00532991
Pcsk1n	-0.301403	4.25225e-05	0.00546092
Esyt2	0.27416	4.25928e-05	0.00546092
Spock2	-0.334122	4.26362e-05	0.00546092
Ccdc107	0.563494	4.30817e-05	0.00546828
Mpp7	0.469737	4.56469e-05	0.00573082
Gprasp2	0.374979	4.80315e-05	0.00583376
St3gal5	0.351606	5.22172e-05	0.00618226
Nr4a2	0.907625	5.44879e-05	0.00639733
Igsf9	1.31635	5.53221e-05	0.00640655
Kif17	2.20105	5.54758e-05	0.00640655
Dcun1d4	0.477267	5.79502e-05	0.00659319
Idh1	0.334005	5.82745e-05	0.00659319
Gpt2	0.424054	5.84959e-05	0.00659319
Atad2	0.729872	5.9563e-05	0.00661024
Ugdh	0.425896	5.95855e-05	0.00661024
Rassf7	0.556399	6.52901e-05	0.00706356
Sec16b	0.570939	6.61786e-05	0.00706356
Slc25a39	-0.238448	6.70644e-05	0.00710429
Mmrn2	-1.59207	7.12478e-05	0.00743563
Fstl4	1.86933	7.70017e-05	0.00781021
Fbxl5	0.270478	7.70544e-05	0.00781021
Chd1	0.419286	8.80171e-05	0.00865722
Emcn	-2.23881	8.84832e-05	0.00865722
Snapin	0.345097	9.16973e-05	0.00890982
Impact	0.324064	9.29755e-05	0.00897213
Dhx32	0.301585	0.000100813	0.00946899
Mtcl1	0.490816	0.000104052	0.00962113
AI414108	1.13205	0.000104292	0.00962113
Kdr	-0.949789	0.000107526	0.00983549
Sst	0.570538	0.000112653	0.0101094
Crot	0.385843	0.000119792	0.0106819
Gm14322	0.743136	0.000121633	0.0107779
Atoh8	-1.46648	0.000124198	0.0108685
Gm14326	0.676343	0.000133106	0.0115253
Slc7a6	0.504562	0.000134769	0.0115426
Tnrc6a	0.571934	0.000141688	0.012024
Dagla	-0.474279	0.000143214	0.012024
2900097C17Rik	0.248518	0.000145015	0.0120894
Mknk2	0.380148	0.000157766	0.012923
Btbd17	-0.437569	0.000159274	0.0129712
Arl4a	0.343102	0.000165762	0.0132716
Tmed5	0.381769	0.000166731	0.0132716
Vprbp	0.359145	0.000169388	0.0132759
Nek5	1.15708	0.000171188	0.0133253
Gatsl2	0.394888	0.000184085	0.0138694
Cyfip2	-0.270227	0.000188091	0.014054
Hs3st2	-2.40601	0.000208183	0.0151091
Nos3	-1.82201	0.000210012	0.0151091
Atp2b1	0.304104	0.000222079	0.0158826
Akap8	0.338676	0.000228737	0.0161915
Chuk	0.239719	0.000228908	0.0161915
Ptprz1	-1.07318	0.000237594	0.016654
Calr3	1.04463	0.000238778	0.0166542
Bscl2	-0.266649	0.000248496	0.0172466
Tmem51	-0.333888	0.000251488	0.017284
Bet1	0.34705	0.000267939	0.0182367
Prr15l	0.669504	0.000281481	0.018975
Serp1	0.256844	0.000290305	0.0194393
Cdc14a	1.0093	0.000298837	0.0197667
Cdh5	-1.35257	0.000302456	0.0199127
Sh3bgrl2	1.10237	0.000305064	0.0199409
Ttc7	0.455811	0.00031044	0.020114
Adgrl4	-1.05262	0.000311226	0.020114
Il6ra	-0.480414	0.000314466	0.0202307
Vsig2	2.10943	0.000317889	0.0203579
Pcyox1l	-0.54124	0.000319841	0.0203902
Pygl	-0.784357	0.000331116	0.0206934
S1pr1	-0.890192	0.000338209	0.0208992
Pcyox1	0.273219	0.000349989	0.0213463
Mapk10	-0.321413	0.000352334	0.0213967
Sdcbp2	0.813772	0.000353869	0.0213977
Ntn4	1.10523	0.000355398	0.0213983
Gp5	-2.15843	0.000359387	0.0214551
Tbc1d4	0.851421	0.000363925	0.021622
Zfp422	0.368991	0.000365251	0.021622
1700086L19Rik	0.344991	0.000375519	0.0221027
Tkt	-0.256001	0.000376511	0.0221027
Senp2	0.306548	0.000379755	0.0222007
Srebf1	-0.287767	0.000388781	0.0226344
Rnf182	-0.908173	0.000394886	0.0228014
Hspa13	0.249411	0.000398697	0.0229275
Arl15	0.613633	0.000417705	0.0238261
2810403A07Rik	0.376454	0.000427415	0.0241842
Far1	0.302254	0.000429486	0.0242041
1810011O10Rik	1.35895	0.000440744	0.024543
Apoe	-0.331285	0.000444106	0.024543
4931408D14Rik	-1.45833	0.000444684	0.024543
Pdxk	0.313231	0.000448328	0.024543
Pdia4	0.232371	0.000448893	0.024543
H1fx	-0.688919	0.000450379	0.024543
Cldn3	0.469229	0.000450851	0.024543
Msl3l2	-0.487576	0.000468108	0.0248875
Epn1	-0.419687	0.000475841	0.025199
Rapgefl1	2.64573	0.000477544	0.025199
Crebzf	0.468881	0.000513582	0.0267995
Morf4l2	0.185542	0.000525033	0.0272343
Sars2	0.46406	0.000525781	0.0272343
Gnao1	-0.253415	0.000534204	0.0275692
Ptov1	-0.246103	0.000554892	0.0282517
Igfals	-0.332984	0.00055545	0.0282517
Armcx5	0.565716	0.000562467	0.0283745
Ncam2	-0.981401	0.000563905	0.0283745
Slc12a2	0.591674	0.000579991	0.0290801
Ddx26b	0.617515	0.000600314	0.0297963
Prom2	1.83606	0.000608525	0.0298235
Cask	-0.279877	0.000609965	0.0298235
0610007P14Rik	0.366383	0.00061168	0.0298235
Lrrc24	-0.554192	0.000613237	0.0298235
Slc44a3	-0.324821	0.00061599	0.0298237
Zranb1	0.311441	0.000631689	0.030375
Cks1b	0.474703	0.000642331	0.0307816
Aplp2	0.34267	0.00066314	0.0314944
Trip13	1.54916	0.000663911	0.0314944
Zfp386	0.330856	0.000676589	0.0317381
Ensa	0.231922	0.000678534	0.0317381
Ercc6	0.492648	0.000679789	0.0317381
Pdk4	1.0756	0.000681339	0.0317381
Engase	-0.567008	0.000682563	0.0317381
Nfatc3	0.430592	0.000702185	0.0321979
Col25a1	2.17845	0.000703879	0.0321979
Grhpr	-0.429204	0.000714446	0.032366
Edn2	2.99714	0.000731706	0.0329361
Arhgap31	-0.747898	0.000745834	0.0333717
2510002D24Rik	0.430118	0.000755595	0.0333717
Xpot	0.279121	0.000764412	0.0336556
Prss8	0.631627	0.000782818	0.0343586
Alg6	0.578864	0.000803557	0.0351594
Cstf2t	0.355848	0.00084248	0.0366349
Sez6l2	-0.319484	0.000848715	0.0367377
Kras	0.274641	0.000850059	0.0367377
Rps4l	-0.283149	0.000853679	0.0367813
Gnas	-0.22485	0.000859437	0.036841
Kif5b	0.215963	0.000860295	0.036841
Slc38a3	2.43059	0.000876325	0.0371884
Fam83d	4.59075	0.00091011	0.0382955
Sgpp1	0.183085	0.000910567	0.0382955
Slc25a33	0.735945	0.000924468	0.0387644
Atp11b	0.207551	0.00093741	0.0388998
Tmem41b	0.306223	0.000952166	0.0392068
Prdm15	0.456941	0.000954498	0.0392068
Slc40a1	0.278722	0.00101011	0.0406611
Cyp4b1	2.15935	0.00102345	0.041081
Ahr	0.730811	0.00104542	0.0416073
Luzp1	0.381593	0.00108649	0.0428785
Mapk8ip1	-0.356952	0.00110594	0.0434026
Zcchc16	-1.65006	0.00111408	0.0436009
Kctd12b	-1.16786	0.00113887	0.0443249
Tdo2	-0.942798	0.00117094	0.0450747
Srrm4	0.9031	0.00118549	0.0453869
Ucp2	-0.218467	0.00119186	0.0455072
Mcfd2	0.249803	0.0012115	0.0458841
Mafb	-0.529834	0.00122508	0.0461007
Ap3b2	-0.232145	0.00125532	0.0469131
Rnf25	0.272407	0.0012616	0.0470228
Adh1	-0.356321	0.00127969	0.0475713
Slc6a6	0.231232	0.00130192	0.0481342
Med13l	0.488201	0.0013085	0.0481342
Ssr2	0.225237	0.00133294	0.0487787
1810043G02Rik	-0.255617	0.00133659	0.0487854
Dcaf5	-0.299547	0.00134465	0.0488267
Ubn1	0.266962	0.00135189	0.0489425
Zfp445	0.297887	0.00136341	0.0491279
Hgfac	-0.280769	0.00136765	0.0491551
Slco1a6	-0.346454	0.00138022	0.0492395
Stambpl1	0.514459	0.00138048	0.0492395
